# Supplementary material for: Spectroscopic and quantum chemical characterization of the ground and lowest electronically excited singlet and triplet states of halo- and nitro-harmines in aqueous media
Source: Royal Society of Chemistry journal article supplement (doi:10.1039/d1cp00901j), 2021-01-01
Supplement: d1cp00901j1.pdf [file d1cp00901j1.pdf]

## Supporting Information

### **Spectroscopic and quantum chemical characterization of the ground and lowest electronically excited singlet and triplet states of halo- and nitro-harmines in aqueous media**

*M. Paula Denofrio,<sup>a</sup> Fernando D. Villarruel,<sup>a</sup> Rosa Erra-Balsells,<sup>b,c</sup> Peter R. Ogilby<sup>d</sup>, Ezequiel Wolcan,<sup>e,\*</sup> and Franco M. Cabrerizo<sup>a,\*</sup>*

<sup>a</sup> Instituto Tecnológico de Chascomús (INTECH), Universidad Nacional de San Martín (UNSAM) - Consejo Nacional de Investigaciones Científicas y Técnicas (CONICET), Av. Intendente Marino Km 8.2, CC 164 (B7130IWA), Chascomús, Argentina. E-mail: [fcabrerizo@intech.gov.ar](mailto:fcabrerizo@intech.gov.ar)

<sup>b</sup> Universidad de Buenos Aires. Facultad de Ciencias Exactas y Naturales. Departamento de Química Orgánica. Pabellón II, 3er P., Ciudad Universitaria, (1428) Buenos Aires, Argentina.

<sup>c</sup> CONICET, Universidad de Buenos Aires. Centro de Investigación en Hidratos de Carbono (CIHIDECAR). Facultad de Ciencias Exactas y Naturales. Pabellón II, 3er P., Ciudad Universitaria, (1428) Buenos Aires, Argentina.

<sup>d</sup> Center for Oxygen Microscopy and Imaging, Department of Chemistry, University of Aarhus, DK-8000 Århus, Denmark.

<sup>e</sup> INIFTA - CONICET, Universidad Nacional de La Plata, Diag. 113 y 64 (1900), La Plata, Argentina. E-mail: [ewolcan@inifta.unlp.edu.ar](mailto:ewolcan@inifta.unlp.edu.ar)

\* To whom correspondence should be addressed. E-mail: F.M.C, [fcabrerizo@intech.gov.ar](mailto:fcabrerizo@intech.gov.ar) and E.W., [ewolcan@inifta.unlp.edu.ar](mailto:ewolcan@inifta.unlp.edu.ar)

| <b>Contents:</b>                                                                                                                                     | <b><u>Page</u></b> |
|------------------------------------------------------------------------------------------------------------------------------------------------------|--------------------|
| 1. Electrostatic potential maps                                                                                                                      | SI.3               |
| 2. UV-visible spectroscopic titration of <b>8</b> and <b>10</b> and $pK_a$ vs Gibbs “acid half-reaction” free energies ( $\Delta G^0$ ) relationship | SI.4               |
| 3. UV-visible experimental and theoretical spectra of <b>C</b> and <b>N</b> species of <b>5 – 7</b>                                                  | SI.5               |
| 4. UV-visible experimental and theoretical spectra of <b>C</b> and <b>N</b> species of <b>8 – 10</b>                                                 | SI.6               |
| 5. UV-visible experimental and theoretical spectra of <b>Z</b> species of <b>5 – 10</b>                                                              | SI.7               |
| 6. <b>Table SI.1.</b> Theoretical data of the 50 electronic transitions calculated for <b>5C</b>                                                     | SI.8               |
| 7. <b>Table SI.2.</b> Theoretical data of the 50 electronic transitions calculated for <b>6C</b>                                                     | SI.9               |
| 8. <b>Table SI.3.</b> Theoretical data of the 50 electronic transitions calculated for <b>7C</b>                                                     | SI.10              |
| 9. <b>Table SI.4.</b> Theoretical data of the 50 electronic transitions calculated for <b>8C</b>                                                     | SI.11              |
| 10. <b>Table SI.5.</b> Theoretical data of the 50 electronic transitions calculated for <b>9C</b>                                                    | SI.12              |
| 11. <b>Table SI.6.</b> Theoretical data of the 50 electronic transitions calculated for <b>10C</b>                                                   | SI.13              |
| 12. <b>Table SI.7.</b> Theoretical data of the 50 electronic transitions calculated for <b>5N</b>                                                    | SI.14              |
| 13. <b>Table SI.8.</b> Theoretical data of the 50 electronic transitions calculated for <b>6N</b>                                                    | SI.15              |
| 14. <b>Table SI.9.</b> Theoretical data of the 50 electronic transitions calculated for <b>7N</b>                                                    | SI.16              |
| 15. <b>Table SI.10.</b> Theoretical data of the 50 electronic transitions calculated for <b>8N</b>                                                   | SI.17              |
| 16. <b>Table SI.11.</b> Theoretical data of the 50 electronic transitions calculated for <b>9N</b>                                                   | SI.18              |
| 17. <b>Table SI.12.</b> Theoretical data of the 50 electronic transitions calculated for <b>10N</b>                                                  | SI.19              |
| 18. Molecular orbital diagram of neutral ( <b>N</b> ) and cationic ( <b>C</b> ) species of bromoharmines ( <b>5 - 7</b> )                            | SI.20              |
| 19. Molecular orbital diagram of neutral ( <b>N</b> ) and cationic ( <b>C</b> ) species of nitroharmines ( <b>8 - 10</b> )                           | SI.21              |
| 20. Other molecular orbital diagram of compounds <b>5</b> to <b>10</b>                                                                               | SI.22              |
| 21. <b>Table SI.13.</b> Self-Consistent Field energies of <b>N</b> and <b>Z</b> species of <b>5 – 10</b>                                             | SI.23              |
| 22. Fluorescence spectra of 6-bromoharmine ( <b>5</b> ) as a function of pH and O <sub>2</sub> concentration.                                        | SI.24              |
| 23. Phosphorescence spectra at 77 K                                                                                                                  | SI.25              |
| 24. Calculated (0K) vs. experimental (77K) maximum wavelength of phosphoresce emission                                                               | SI.26              |
| 25. Spin-density distribution of <b>1 – 3</b>                                                                                                        | SI.27              |
| 26. Spin-density distribution of <b>5 - 10</b>                                                                                                       | SI.28              |
| 27. Dipole moments and the total electron density in the ground (S <sub>0</sub> ) and triplet (T <sub>1</sub> ) states                               | SI.29              |
| 28. Relationship between $\lambda_{0-0}$ , $\mu_d^C(T_1)$ and experimental $\Phi_{\Delta}^{(O_2)}$                                                   | SI.30              |

## 1. Electrostatic potential maps

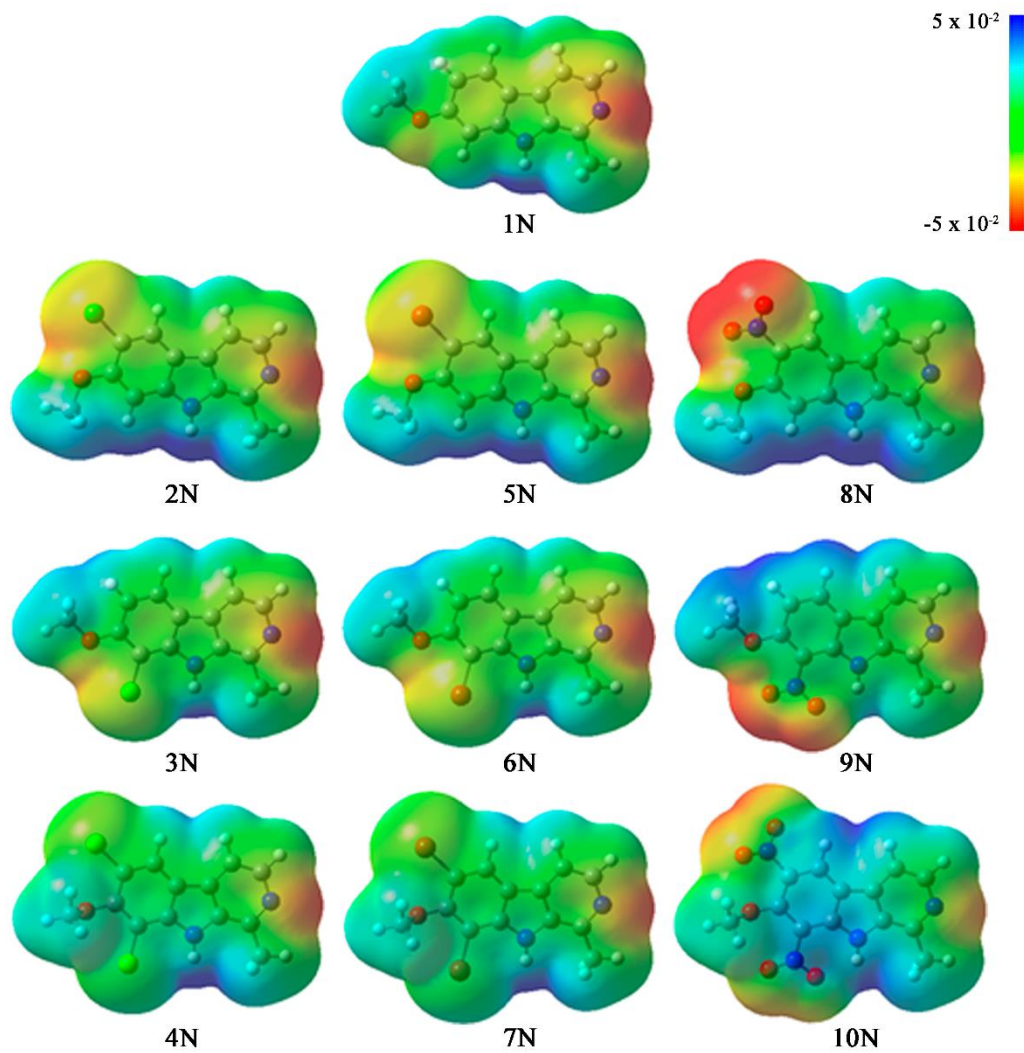

**Figure SI.1.** Electrostatic potential maps of neutral species of harmine (**1**), bromoharmines (**5 – 7**) and nitroharmines (**8 – 10**).

## 2. UV-visible spectroscopic titration of **8** and **10** and $pK_a$ vs Gibbs “acid half-reaction” free energies ( $\Delta G^0$ ) relationship

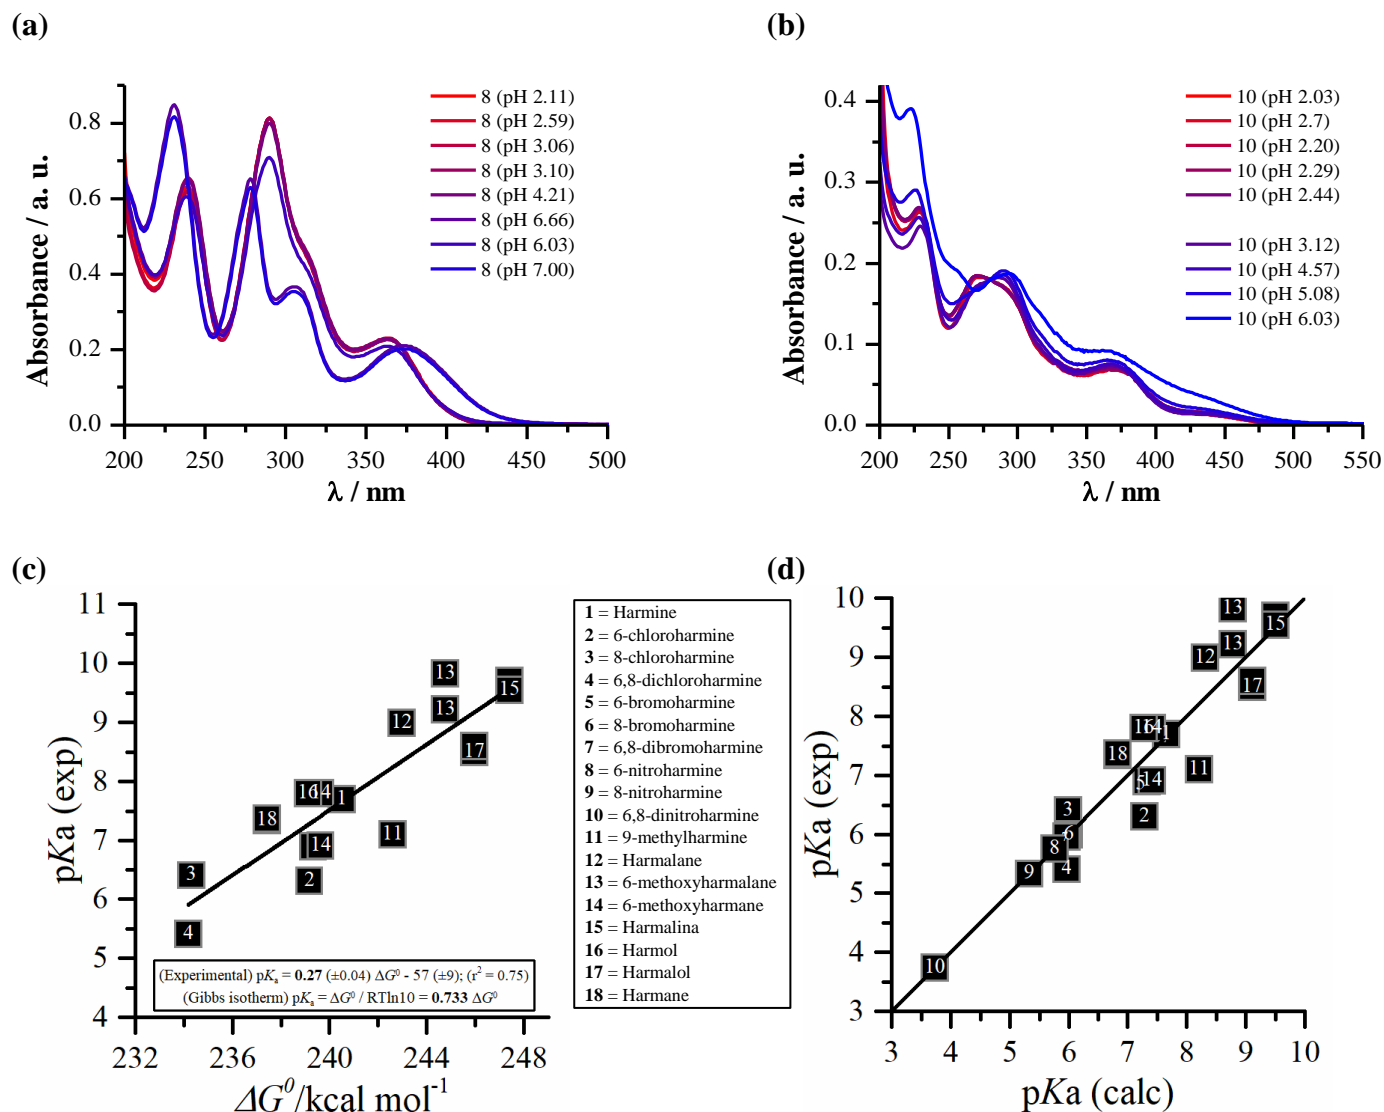

**Figure SI.2.** (a) and (b) UV-visible absorption spectra pH-evolution of 6-nitroharmine (**8**) and 6,8-dinitroharmine (**10**), respectively. (c) Relationship between the experimental  $pK_a$  and the difference between Gibbs “acid half-reaction” free energies ( $\Delta G^0$ ) between cationic (C) and neutral (N) species in the gas phase. (d) Relationship between the experimental and calculated  $pK_a$  values.

### 3. UV-visible experimental and theoretical spectra of C and N species of 5 – 7

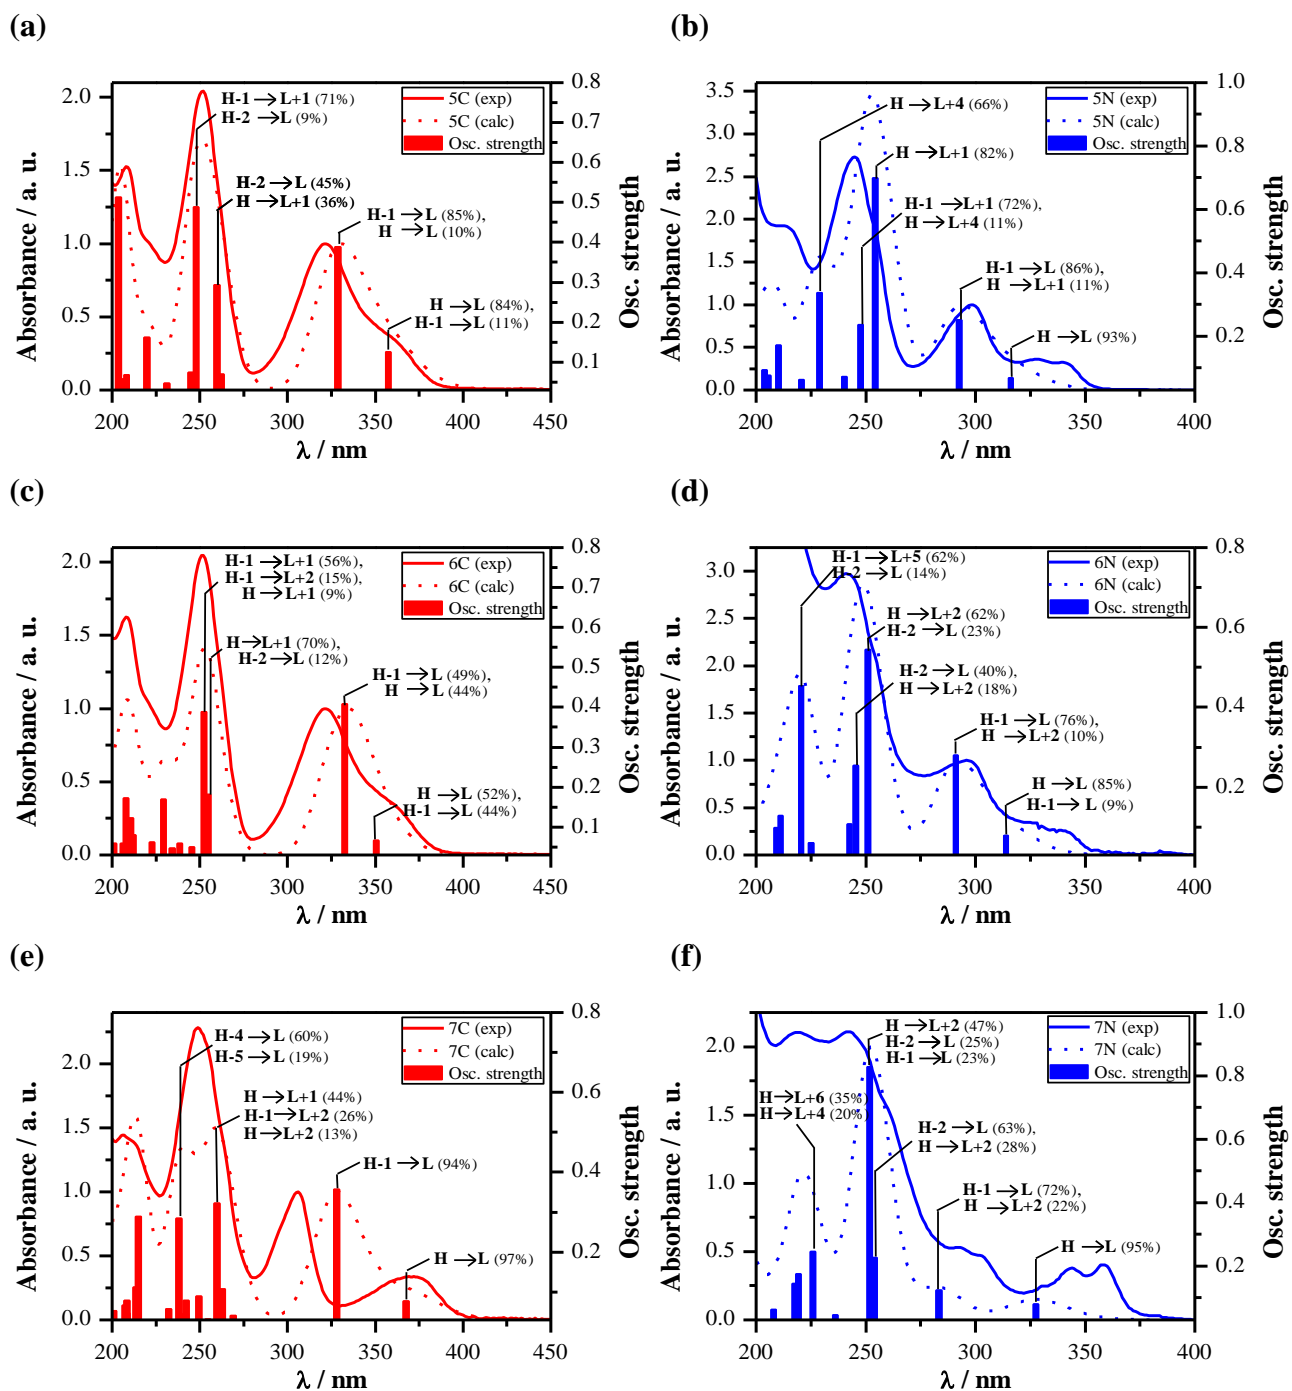

**Figure SI.3.** Experimental (solid lines) and calculated (dashed lines) absorption spectra of cationic (C) (red) and neutral (N) (blue) species of compounds **5** (a, b), **6** (c, d) and **7** (e, f).

#### 4. UV-visible experimental and theoretical spectra of C and N species of 8 – 10

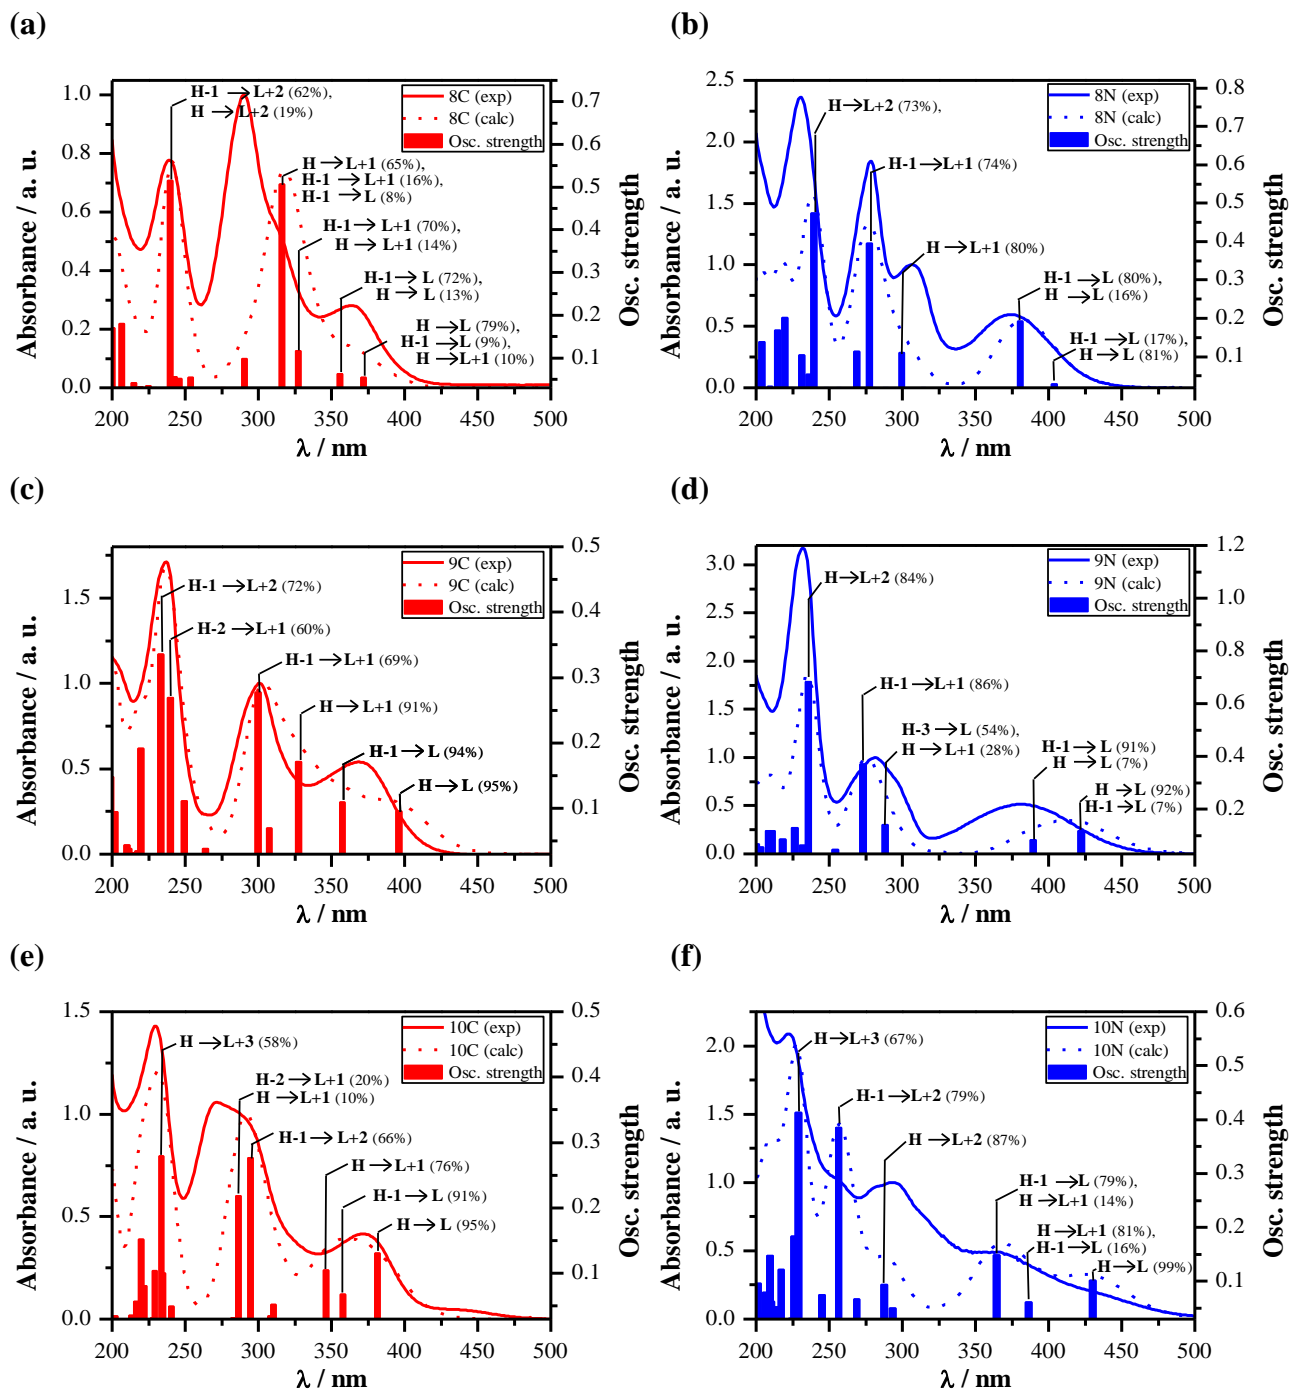

**Figure SI.4.** Experimental (solid lines) and calculated (dashed lines) absorption spectra of cationic (C) (red) and neutral (N) (blue) species of compounds **8** (a, b), **9** (c, d) and **10** (e, f).

## 5. UV-visible experimental and theoretical spectra of Z species of 5 – 10

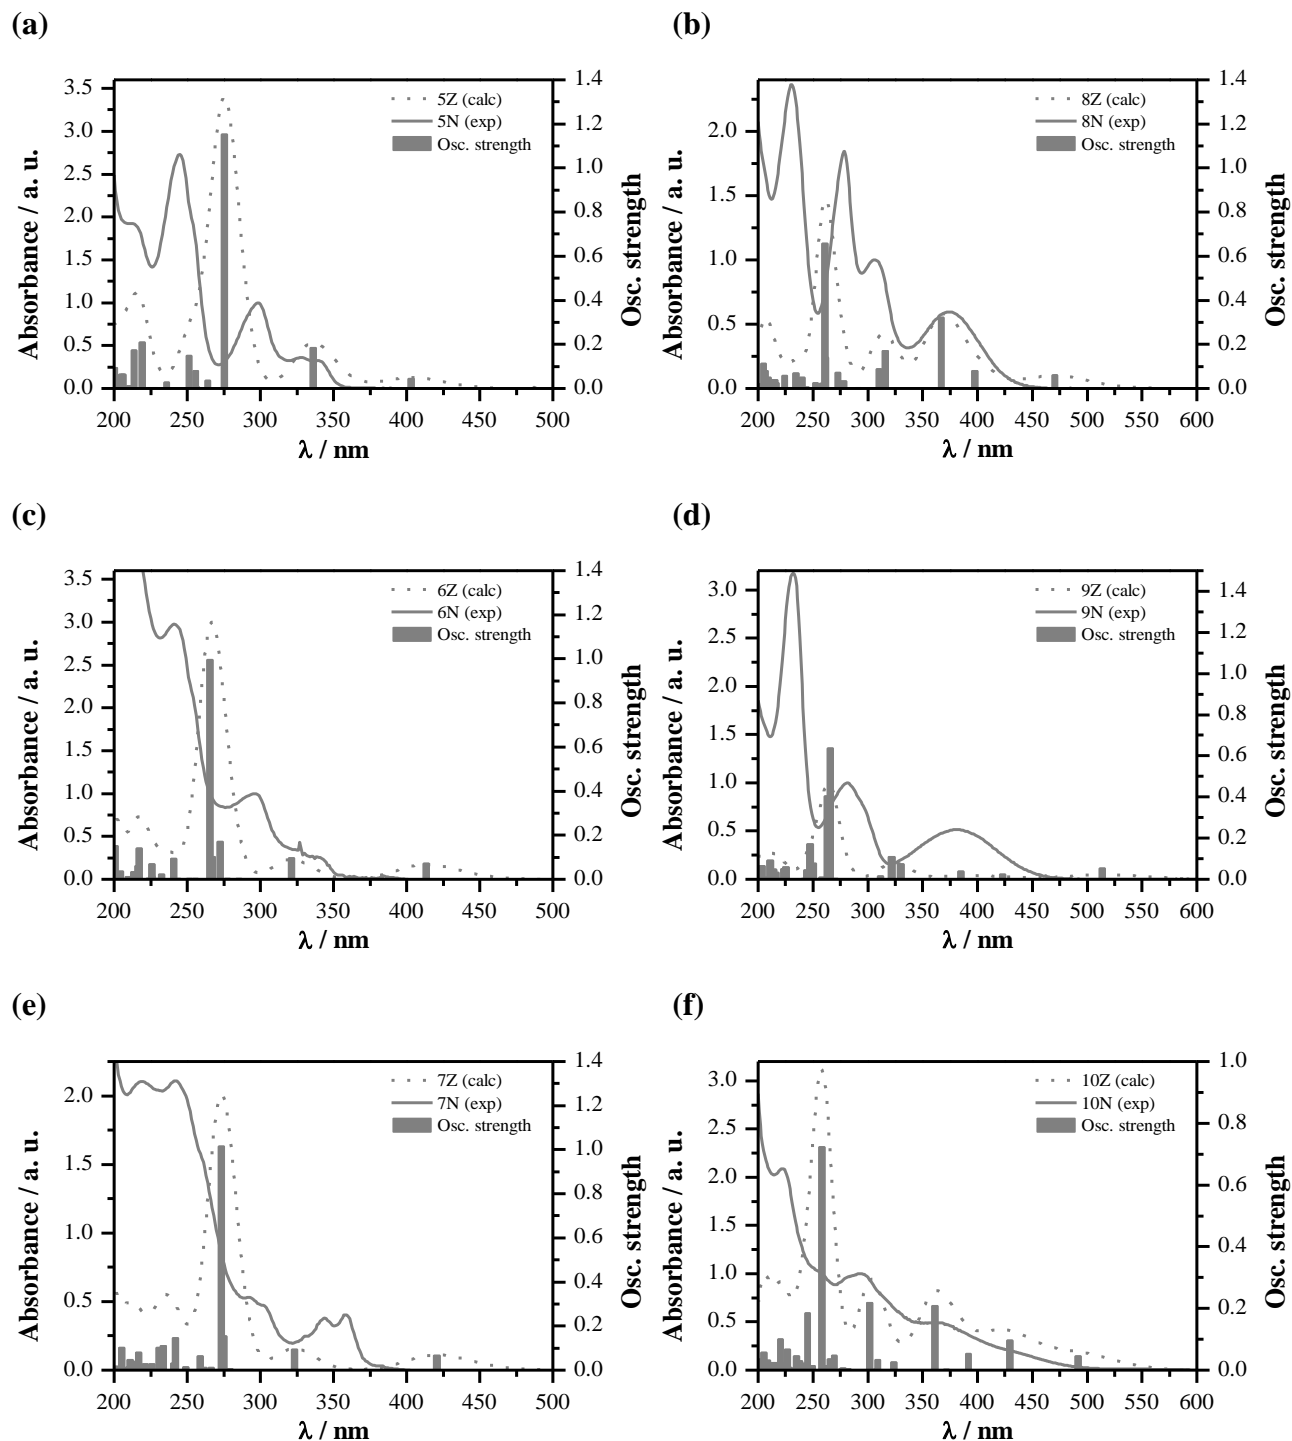

**Figure SI.5.** Experimental (solid lines) and calculated (dashed lines) absorption spectra of neutral (N) and zwitterionic (Z) species of (a) 6-bromoharmine (5), (b) 6-nitroharmine (8), (c) 8-bromoharmine (6), (d) 8-nitroharmine (9), (e) 6,8-dibromoharmine (7) and (f) 6,8-dinitroharmine (10).

**Table SI.1.** Theoretical data of the 50 electronic transitions calculated for the cationic species of 6-bromoharmine (**5C**).

| No. | Energy (cm <sup>-1</sup> ) | λ (nm) | Osc.   | Symmetry (% contribution)                                                                                                                       |
|-----|----------------------------|--------|--------|-------------------------------------------------------------------------------------------------------------------------------------------------|
| 1   | 27980.98625                | 357.39 | 0.1259 | H-1->LUMO (11%), <b>HOMO-&gt;LUMO (84%)</b> , H-1->L+1 (3%)                                                                                     |
| 2   | 30420.00684                | 328.73 | 0.3888 | <b>H-1-&gt;LUMO (85%)</b> , HOMO->LUMO (10%), HOMO->L+1 (3%)                                                                                    |
| 3   | 38135.50651                | 262.22 | 0.0694 | H-2->LUMO (29%), H-1->L+1 (10%), HOMO->L+1 (56%)                                                                                                |
| 4   | 38497.64945                | 259.76 | 0.2939 | <b>H-2-&gt;LUMO (45%)</b> , <b>HOMO-&gt;L+1 (36%)</b> , H-1->L+1 (6%), H-1->L+2 (5%), HOMO->L+2 (2%)                                            |
| 5   | 40347.07876                | 247.85 | 0.4878 | <b>H-1-&gt;L+1 (71%)</b> , H-4->LUMO (2%), H-2->LUMO (9%), H-1->L+2 (4%), HOMO->LUMO (4%), HOMO->L+2 (4%)                                       |
| 6   | 40359.17707                | 247.78 | 0.0008 | HOMO->L+3 (96%)                                                                                                                                 |
| 7   | 40850.36872                | 244.80 | 0.0744 | HOMO->L+2 (78%) H-2->LUMO (8%), H-1->L+1 (4%), H-1->L+7 (4%)                                                                                    |
| 8   | 41034.26313                | 243.70 | 0.0001 | H-3->LUMO (98%)                                                                                                                                 |
| 9   | 43238.57638                | 231.27 | 0.0465 | H-1->L+2 (81%) H-2->LUMO (6%), HOMO->L+2 (5%), HOMO->L+7 (2%)                                                                                   |
| 10  | 43306.32696                | 230.91 | 0.0001 | H-1->L+3 (97%)                                                                                                                                  |
| 11  | 44370.9788                 | 225.37 | 0.0001 | HOMO->L+4 (88%) HOMO->L+5 (5%)                                                                                                                  |
| 12  | 45323.51958                | 220.64 | 0.0005 | H-1->L+4 (88%) H-1->L+5 (5%), HOMO->L+5 (2%)                                                                                                    |
| 13  | 45501.76811                | 219.77 | 0.161  | <b>H-4-&gt;LUMO (83%)</b> , H-2->L+1 (7%)                                                                                                       |
| 14  | 46903.55971                | 213.20 | 0.0032 | HOMO->L+5 (76%) HOMO->L+4 (8%), HOMO->L+6 (9%)                                                                                                  |
| 15  | 47518.15418                | 210.45 | 0.0013 | HOMO->L+5 (13%), HOMO->L+6 (80%) H-1->L+6 (2%)                                                                                                  |
| 16  | 47981.11643                | 208.42 | 0.0102 | H-1->L+5 (90%) H-1->L+4 (5%)                                                                                                                    |
| 17  | 48014.99171                | 208.27 | 0.0683 | H-5->LUMO (60%), HOMO->L+7 (27%) H-2->L+1 (5%), H-1->L+7 (4%)                                                                                   |
| 18  | 48482.79328                | 206.26 | 0.0571 | H-5->LUMO (18%), H-2->L+1 (13%), HOMO->L+7 (53%) H-2->L+2 (6%), H-1->L+2 (3%)                                                                   |
| 19  | 48905.4278                 | 204.48 | 0      | H-1->L+6 (92%)                                                                                                                                  |
| 20  | 49100.61397                | 203.66 | 0.5126 | <b>H-2-&gt;L+1 (31%)</b> , <b>H-1-&gt;L+7 (61%)</b> , HOMO->L+7 (2%)                                                                            |
| 21  | 50118.48566                | 199.53 | 0.0002 | HOMO->L+8 (92%), HOMO->L+6 (3%)                                                                                                                 |
| 22  | 51170.23264                | 195.43 | 0.0012 | H-1->L+8 (93%)                                                                                                                                  |
| 23  | 51372.6778                 | 194.66 | 0.0002 | H-3->L+1 (72%), H-3->L+2 (24%)                                                                                                                  |
| 24  | 51590.4475                 | 193.83 | 0.0129 | H-6->LUMO (33%), H-3->L+3 (13%), H-2->L+2 (46%) HOMO->L+7 (3%)                                                                                  |
| 25  | 51697.71924                | 193.43 | 0.0093 | HOMO->L+9 (87%) HOMO->L+6 (2%)                                                                                                                  |
| 26  | 52080.02604                | 192.01 | 0.014  | H-3->L+3 (84%) H-6->LUMO (6%), H-2->L+2 (7%)                                                                                                    |
| 27  | 52128.4193                 | 191.83 | 0.0004 | H-7->LUMO (94%) H-8->LUMO (2%)                                                                                                                  |
| 28  | 52452.65418                | 190.65 | 0.017  | H-5->LUMO (11%), H-2->L+1 (22%), H-1->L+7 (12%), HOMO->L+10 (27%) H-6->LUMO (9%), H-4->LUMO (3%), H-4->L+2 (2%), HOMO->L+2 (2%), HOMO->L+7 (4%) |
| 29  | 52804.31191                | 189.38 | 0.0017 | H-2->L+3 (24%), HOMO->L+11 (61%) HOMO->L+12 (6%)                                                                                                |
| 30  | 52958.36381                | 188.83 | 0.0006 | H-2->L+3 (27%), H-1->L+9 (55%) HOMO->L+11 (7%)                                                                                                  |
| 31  | 53017.24228                | 188.62 | 0.0793 | H-6->LUMO (27%), H-2->L+2 (13%), H-1->L+10 (11%), HOMO->L+10 (42%)                                                                              |
| 32  | 53154.35653                | 188.13 | 0.0671 | H-2->L+1 (11%), H-2->L+2 (13%), H-1->L+10 (11%), HOMO->L+10 (27%) H-6->LUMO (9%), H-4->LUMO (2%), H-4->L+1 (7%), H-4->L+2 (3%), H-1->L+7 (9%)   |
| 33  | 53285.01835                | 187.67 | 0.0001 | H-2->L+3 (37%), H-1->L+9 (37%), HOMO->L+11 (19%)                                                                                                |
| 34  | 54139.96605                | 184.71 | 0.0003 | H-3->L+1 (25%), H-3->L+2 (74%)                                                                                                                  |
| 35  | 54227.88048                | 184.41 | 0.0673 | H-1->L+10 (72%) H-6->LUMO (8%), H-4->L+1 (2%), H-2->L+2 (9%)                                                                                    |
| 36  | 54261.75577                | 184.29 | 0.0023 | H-1->L+11 (64%), HOMO->L+12 (16%) H-1->L+12 (5%), HOMO->L+14 (3%)                                                                               |
| 37  | 54565.82679                | 183.26 | 0.0076 | H-1->L+11 (22%), HOMO->L+12 (61%) H-2->L+4 (4%), HOMO->L+11 (3%), HOMO->L+14 (3%)                                                               |
| 38  | 55120.73623                | 181.42 | 0.0045 | H-2->L+4 (78%) H-1->L+12 (8%), HOMO->L+12 (6%)                                                                                                  |
| 39  | 55602.24923                | 179.85 | 0.0001 | HOMO->L+14 (79%) H-1->L+12 (6%), HOMO->L+12 (6%)                                                                                                |
| 40  | 55628.05897                | 179.77 | 0      | H-1->L+12 (64%) H-2->L+4 (9%), H-1->L+11 (3%), H-1->L+14 (9%), HOMO->L+14 (7%)                                                                  |
| 41  | 55728.07172                | 179.44 | 0.0011 | HOMO->L+13 (95%) H-1->L+10 (2%)                                                                                                                 |
| 42  | 56599.95706                | 176.68 | 0.0053 | H-4->L+1 (17%), H-1->L+13 (74%) H-2->L+7 (3%)                                                                                                   |
| 43  | 56713.68123                | 176.32 | 0.003  | H-9->LUMO (28%), H-8->LUMO (29%), HOMO->L+15 (34%) H-11->LUMO (2%)                                                                              |
| 44  | 56732.23198                | 176.27 | 0.0027 | H-9->LUMO (18%), H-8->LUMO (17%), H-1->L+14 (10%), HOMO->L+15 (47%)                                                                             |
| 45  | 56834.66439                | 175.95 | 0      | H-1->L+12 (11%), H-1->L+14 (72%) HOMO->L+15 (6%)                                                                                                |
| 46  | 56888.70354                | 175.78 | 0.0624 | H-4->L+1 (57%), H-1->L+13 (22%) H-2->L+7 (9%)                                                                                                   |
| 47  | 57678.32033                | 173.38 | 0.0003 | H-9->LUMO (51%), H-8->LUMO (44%)                                                                                                                |
| 48  | 57822.69357                | 172.94 | 0.0011 | H-2->L+5 (85%) H-2->L+6 (3%), H-2->L+8 (2%), H-1->L+15 (2%)                                                                                     |
| 49  | 57889.63759                | 172.74 | 0.0009 | H-1->L+15 (88%) H-2->L+5 (3%)                                                                                                                   |
| 50  | 58084.0172                 | 172.16 | 0.1116 | H-4->L+2 (10%), H-2->L+7 (69%) H-5->L+1 (7%), H-4->L+1 (7%)                                                                                     |



**Table SI.2.** Theoretical data of the 50 electronic transitions calculated for the cationic species of 8-bromoharmine (**6C**).

| No. | Energy (cm <sup>-1</sup> ) | $\lambda$ (nm) | Osc.   | Symmetry (% contribs)                                                                                      |
|-----|----------------------------|----------------|--------|------------------------------------------------------------------------------------------------------------|
| 1   | 28539.12192                | 350.40         | 0.0663 | <b>H-1-&gt;LUMO (44%), HOMO-&gt;LUMO (52%)</b>                                                             |
| 2   | 30077.22121                | 332.48         | 0.4089 | <b>H-1-&gt;LUMO (49%), HOMO-&gt;LUMO (44%)</b> H-1->L+1 (3%), HOMO->L+1 (3%)                               |
| 3   | 37974.19563                | 263.34         | 0.016  | H-2->LUMO (59%), H-1->L+1 (11%), HOMO->L+2 (24%) HOMO->L+1 (3%)                                            |
| 4   | 38184.70633                | 261.88         | 0.0115 | HOMO->L+1 (10%), HOMO->L+2 (59%), HOMO->L+3 (11%) H-2->LUMO (9%), H-1->L+1 (7%)                            |
| 5   | 39248.55162                | 254.79         | 0.1809 | <b>H-2-&gt;LUMO (12%), HOMO-&gt;L+1 (70%)</b> H-1->LUMO (3%), HOMO->L+2 (3%), HOMO->L+3 (3%)               |
| 6   | 39619.56666                | 252.40         | 0.3886 | <b>H-1-&gt;L+1 (56%), H-1-&gt;L+2 (15%)</b> H-3->LUMO (3%), H-2->LUMO (5%), HOMO->L+1 (9%), HOMO->L+3 (4%) |
| 7   | 40739.06421                | 245.46         | 0.0504 | H-1->L+1 (11%), H-1->L+2 (77%) H-3->LUMO (3%), H-2->LUMO (4%), H-1->L+3 (2%)                               |
| 8   | 41908.56813                | 238.61         | 0.059  | H-3->LUMO (91%) H-1->L+1 (3%)                                                                              |
| 9   | 42696.57181                | 234.21         | 0.0473 | H-1->L+3 (53%), HOMO->L+3 (21%) H-2->LUMO (5%), H-1->L+1 (3%), HOMO->L+2 (2%), HOMO->L+5 (6%), HOMO->L+6   |
| 10  | 43606.3652                 | 229.32         | 0.1696 | H-4->LUMO (10%), <b>H-1-&gt;L+3 (25%), HOMO-&gt;L+3 (50%)</b> HOMO->L+2 (6%), HOMO->L+5 (2%)               |
| 11  | 44910.56372                | 222.66         | 0.0611 | H-4->LUMO (34%), HOMO->L+4 (49%) HOMO->L+3 (4%), HOMO->L+5 (3%), HOMO->L+6 (3%)                            |
| 12  | 45088.81224                | 221.78         | 0.0148 | H-4->LUMO (42%), HOMO->L+4 (32%), H-2->L+1 (6%), H-1->L+4 (4%), HOMO->L+2 (2%), HOMO->L+3 (2%), HOMO->L    |
| 13  | 46001.83186                | 217.38         | 0.0107 | H-1->L+4 (81%) H-1->L+6 (5%), HOMO->L+5 (5%)                                                               |
| 14  | 47135.84739                | 212.15         | 0.0798 | H-5->LUMO (67%), HOMO->L+5 (19%) H-2->L+1 (4%), H-1->L+4 (2%)                                              |
| 15  | 47477.82646                | 210.62         | 0.1227 | H-5->LUMO (25%), <b>HOMO-&gt;L+5 (52%)</b> H-2->L+1 (6%), H-1->L+4 (3%), HOMO->L+4 (5%), HOMO->L+6 (4%)    |
| 16  | 48073.06363                | 208.02         | 0.1715 | H-2->L+1 (12%), <b>HOMO-&gt;L+6 (65%)</b> H-5->LUMO (4%), H-1->L+5 (5%), H-1->L+6 (2%), HOMO->L+4 (5%)     |
| 17  | 48498.92437                | 206.19         | 0.0586 | H-1->L+5 (62%), H-1->L+6 (18%) H-2->L+1 (2%), H-1->L+4 (3%), HOMO->L+6 (5%), HOMO->L+7 (3%)                |
| 18  | 48760.24801                | 205.09         | 0.009  | HOMO->L+7 (74%) H-2->L+2 (6%), H-1->L+5 (5%), H-1->L+7 (7%)                                                |
| 19  | 49324.83611                | 202.74         | 0.0312 | H-2->L+2 (18%), H-1->L+6 (52%), HOMO->L+7 (10%) H-1->L+4 (2%), H-1->L+5 (8%)                               |
| 20  | 49611.16293                | 201.57         | 0.0029 | H-1->L+7 (84%) H-2->L+2 (6%), HOMO->L+7 (4%)                                                               |
| 21  | 49789.41146                | 200.85         | 0.0592 | H-2->L+2 (53%), H-1->L+6 (14%) H-4->L+2 (3%), H-2->L+3 (5%), H-1->L+5 (9%), H-1->L+7 (3%), HOMO->L+3 (     |
| 22  | 50484.66137                | 198.08         | 0.0578 | H-6->LUMO (15%), H-2->L+1 (42%) H-7->LUMO (5%), H-4->LUMO (3%), H-3->L+2 (8%), H-1->L+3 (3%), HOMO->L+5    |
| 23  | 51069.41334                | 195.81         | 0.0011 | H-3->L+2 (25%), HOMO->L+8 (63%) H-3->L+1 (2%)                                                              |
| 24  | 51283.95681                | 194.99         | 0.0072 | H-6->LUMO (16%), H-3->L+2 (40%), HOMO->L+8 (23%) H-3->L+1 (4%), H-3->L+3 (2%), H-2->L+1 (2%), H-2->L+3     |
| 25  | 51980.81984                | 192.38         | 0.0241 | H-7->LUMO (13%), H-6->LUMO (26%), H-1->L+8 (33%) H-3->L+1 (2%), H-3->L+2 (4%), H-3->L+3 (4%), H-2->L+1     |
| 26  | 52122.77342                | 191.85         | 0.0144 | H-6->LUMO (18%), H-1->L+8 (53%) H-7->LUMO (9%), HOMO->L+9 (5%)                                             |
| 27  | 52400.22814                | 190.84         | 0.0014 | HOMO->L+9 (84%) H-1->L+8 (4%), HOMO->L+10 (3%)                                                             |
| 28  | 52741.40067                | 189.60         | 0.0903 | H-3->L+1 (25%), H-2->L+3 (56%) H-7->LUMO (3%), H-4->L+1 (3%), H-3->L+3 (3%), H-2->L+2 (2%)                 |
| 29  | 53009.17674                | 188.65         | 0.0928 | H-3->L+1 (46%), H-2->L+3 (17%), HOMO->L+10 (10%) H-7->LUMO (3%), H-6->LUMO (3%), H-4->L+1 (5%), H-3->L     |
| 30  | 53126.93368                | 188.23         | 0.0139 | H-1->L+9 (51%), HOMO->L+10 (21%), HOMO->L+11 (11%) H-3->L+1 (4%)                                           |
| 31  | 53273.72659                | 187.71         | 0.0153 | H-1->L+9 (33%), HOMO->L+10 (53%) H-6->LUMO (2%)                                                            |
| 32  | 53606.02701                | 186.55         | 0.0109 | HOMO->L+11 (72%) H-1->L+9 (4%), HOMO->L+10 (6%), HOMO->L+15 (3%)                                           |
| 33  | 54231.1067                 | 184.40         | 0.0157 | H-7->LUMO (27%), H-1->L+10 (32%) H-8->LUMO (3%), H-6->LUMO (4%), H-4->L+1 (4%), H-2->L+1 (4%), H-1->L+     |
| 34  | 54295.63105                | 184.18         | 0.0298 | H-7->LUMO (19%), H-1->L+10 (45%) H-6->LUMO (8%), H-4->L+1 (4%), H-2->L+1 (4%), H-1->L+11 (4%)              |
| 35  | 54509.36798                | 183.45         | 0.0055 | H-1->L+10 (13%), H-1->L+11 (44%), HOMO->L+12 (14%) H-2->L+4 (8%), H-1->L+12 (4%), HOMO->L+14 (5%)          |
| 36  | 54697.29516                | 182.82         | 0.003  | H-2->L+4 (45%), H-1->L+11 (24%), HOMO->L+12 (10%) HOMO->L+13 (3%)                                          |
| 37  | 55207.84411                | 181.13         | 0.0074 | H-2->L+4 (32%), HOMO->L+12 (51%) H-1->L+11 (6%)                                                            |
| 38  | 55392.54507                | 180.53         | 0.0028 | H-8->LUMO (43%), H-3->L+3 (30%) H-10->LUMO (3%), H-9->LUMO (6%), H-4->L+1 (3%), H-3->L+1 (4%), H-3->L+     |
| 39  | 55522.40034                | 180.11         | 0.0205 | H-8->LUMO (28%), H-3->L+3 (42%) H-4->L+1 (8%), H-3->L+1 (4%), H-3->L+2 (7%)                                |
| 40  | 55831.31068                | 179.11         | 0.0402 | H-4->L+1 (14%), H-1->L+12 (10%), HOMO->L+13 (50%) H-8->LUMO (2%), H-7->LUMO (2%), H-4->L+2 (8%)            |
| 41  | 55905.51369                | 178.87         | 0.0352 | H-4->L+1 (18%), H-1->L+12 (10%), HOMO->L+13 (29%) H-8->LUMO (5%), H-7->LUMO (4%), H-2->L+3 (3%), H-2->     |
| 42  | 56011.97888                | 178.53         | 0.0161 | H-1->L+12 (23%), HOMO->L+14 (27%) H-8->LUMO (2%), H-7->LUMO (3%), H-4->L+1 (9%), H-4->L+2 (7%), H-1->L     |
| 43  | 56153.93246                | 178.08         | 0.0105 | H-1->L+12 (34%), HOMO->L+14 (49%) H-1->L+14 (3%), HOMO->L+13 (3%)                                          |
| 44  | 56489.4591                 | 177.02         | 0.0262 | H-4->L+2 (55%) H-10->LUMO (3%), H-9->LUMO (6%), H-2->L+5 (7%), H-2->L+6 (2%), H-1->L+13 (3%), HOMO->L+     |
| 45  | 56641.09133                | 176.55         | 0.0032 | H-10->LUMO (46%), H-9->LUMO (31%) H-8->LUMO (9%), H-4->L+2 (4%), H-2->L+5 (3%)                             |
| 46  | 56827.4054                 | 175.97         | 0.0086 | H-1->L+13 (73%) H-4->L+2 (5%), H-2->L+5 (4%), H-1->L+12 (2%), H-1->L+14 (8%)                               |
| 47  | 56997.58839                | 175.45         | 0.1342 | H-4->L+1 (14%), H-2->L+5 (55%) H-5->L+1 (2%), H-4->L+2 (4%), H-2->L+6 (5%), H-1->L+13 (3%), H-1->L+14      |
| 48  | 57357.31166                | 174.35         | 0.0039 | H-1->L+13 (13%), H-1->L+14 (72%) H-2->L+5 (3%), H-1->L+12 (4%)                                             |
| 49  | 57432.32123                | 174.12         | 0.0032 | HOMO->L+15 (81%) H-5->L+2 (3%), HOMO->L+11 (4%)                                                            |
| 50  | 57661.38268                | 173.43         | 0.0094 | H-5->L+1 (14%), H-5->L+2 (58%) H-2->L+6 (5%), H-2->L+7 (2%), HOMO->L+15 (4%)                               |

**Table SI.3.** Theoretical data of the 50 electronic transitions calculated for the cationic species of 6,8-dibromoharmine (**7C**).

| No. | Energy (cm <sup>-1</sup> ) | $\lambda$ (nm) | Osc.   | Symmetry (% contribs)                                                                                                                                                      |
|-----|----------------------------|----------------|--------|----------------------------------------------------------------------------------------------------------------------------------------------------------------------------|
| 1   | 27208.30711                | 367.53         | 0.0775 | <b>HOMO-&gt;LUMO (97%)</b>                                                                                                                                                 |
| 2   | 30490.98363                | 327.97         | 0.3565 | <b>H-1-&gt;LUMO (94%)</b> HOMO->L+1 (4%)                                                                                                                                   |
| 3   | 36839.37354                | 271.45         | 0.0188 | HOMO->L+1 (13%), HOMO->L+2 (77%) H-2->LUMO (2%), H-1->L+2 (2%), HOMO->L+3 (2%)                                                                                             |
| 4   | 37157.15599                | 269.13         | 0.0399 | H-2->LUMO (87%) H-1->L+1 (2%), H-1->L+2 (2%), H-1->L+3 (3%)                                                                                                                |
| 5   | 38041.9462                 | 262.87         | 0.1065 | H-1->L+1 (14%), H-1->L+2 (51%), HOMO->L+1 (26%)                                                                                                                            |
| 6   | 38495.22979                | 259.77         | 0.3217 | <b>H-1-&gt;L+2 (26%), HOMO-&gt;L+1 (44%), HOMO-&gt;L+2 (13%)</b> H-4->LUMO (4%), H-3->LUMO (2%), H-1->LUMO (3%), H-1->L+1 (3%)                                             |
| 7   | 39283.23346                | 254.56         | 0.0318 | H-3->LUMO (94%) HOMO->L+1 (3%)                                                                                                                                             |
| 8   | 40084.14201                | 249.48         | 0.089  | H-1->L+1 (62%), H-1->L+2 (12%) H-2->LUMO (2%), H-1->L+3 (7%), HOMO->L+3 (5%), HOMO->L+4 (4%), HOMO->L+5 (3%)                                                               |
| 9   | 41301.23265                | 242.12         | 0.0786 | H-5->LUMO (29%), HOMO->L+3 (46%) H-1->L+1 (8%), H-1->L+3 (7%)                                                                                                              |
| 10  | 41355.27179                | 241.81         | 0.0451 | H-5->LUMO (47%), H-4->LUMO (29%), HOMO->L+3 (13%) H-1->L+1 (4%), H-1->L+3 (3%)                                                                                             |
| 11  | 42002.935                  | 238.08         | 0.2847 | <b>H-5-&gt;LUMO (19%), H-4-&gt;LUMO (60%)</b> H-2->L+1 (4%), HOMO->L+1 (6%), HOMO->L+3 (5%)                                                                                |
| 12  | 43065.16718                | 232.21         | 0.057  | H-1->L+3 (58%), HOMO->L+3 (20%) H-2->LUMO (4%), H-1->L+2 (3%), HOMO->L+4 (5%), HOMO->L+5 (3%)                                                                              |
| 13  | 44342.7494                 | 225.52         | 0.003  | HOMO->L+4 (13%), HOMO->L+5 (33%), HOMO->L+6 (42%) HOMO->L+8 (2%)                                                                                                           |
| 14  | 44829.90827                | 223.07         | 0.0016 | H-6->LUMO (93%) H-2->L+1 (2%)                                                                                                                                              |
| 15  | 45280.7722                 | 220.84         | 0.0282 | HOMO->L+4 (47%), HOMO->L+6 (29%) H-1->L+3 (2%), HOMO->L+5 (6%), HOMO->L+7 (9%)                                                                                             |
| 16  | 46505.12182                | 215.03         | 0.2882 | <b>HOMO-&gt;L+4 (18%), HOMO-&gt;L+5 (41%)</b> H-2->L+1 (3%), H-1->L+3 (8%), H-1->L+5 (4%), H-1->L+6 (5%), HOMO->L+6 (9%)                                                   |
| 17  | 46580.93794                | 214.68         | 0.0204 | H-1->L+5 (33%), H-1->L+6 (46%) H-2->L+2 (2%), H-1->L+8 (2%), HOMO->L+6 (5%)                                                                                                |
| 18  | 46821.29116                | 213.58         | 0.1123 | H-7->LUMO (11%), H-1->L+4 (74%) H-2->L+1 (3%), H-1->L+7 (5%)                                                                                                               |
| 19  | 47459.27571                | 210.71         | 0.0171 | H-7->LUMO (52%) H-2->L+1 (7%), H-2->L+2 (8%), H-1->L+5 (9%), H-1->L+6 (7%), H-1->L+7 (4%), HOMO->L+8 (2%)                                                                  |
| 20  | 47976.2771                 | 208.44         | 0.0462 | H-2->L+1 (20%), H-2->L+2 (34%), H-1->L+6 (19%) H-1->L+5 (9%), H-1->L+7 (4%), HOMO->L+7 (6%)                                                                                |
| 21  | 48009.34583                | 208.29         | 0.0781 | HOMO->L+7 (66%) H-2->L+1 (5%), H-1->L+5 (8%), H-1->L+6 (3%), HOMO->L+4 (2%), HOMO->L+5 (4%), HOMO->L+6 (4%)                                                                |
| 22  | 48231.95485                | 207.33         | 0.0657 | H-7->LUMO (15%), H-2->L+2 (38%), H-1->L+5 (11%), HOMO->L+7 (11%), H-2->L+1 (5%), H-2->L+3 (2%), H-1->L+4 (4%), HOMO->L+8 (3%)                                              |
| 23  | 48698.94987                | 205.34         | 0.0105 | HOMO->L+8 (83%) H-1->L+5 (4%), HOMO->L+6 (3%)                                                                                                                              |
| 24  | 48907.84747                | 204.47         | 0.0026 | H-3->L+1 (22%), H-3->L+2 (66%) H-3->L+5 (3%), H-3->L+6 (4%)                                                                                                                |
| 25  | 49753.11651                | 200.99         | 0.0531 | H-2->L+1 (24%), H-1->L+5 (15%), H-1->L+7 (24%) H-8->LUMO (5%), H-7->LUMO (5%), H-2->L+2 (3%), H-1->L+6 (8%)                                                                |
| 26  | 50105.58079                | 199.58         | 0.0027 | H-3->L+1 (53%), H-3->L+2 (12%), H-3->L+3 (17%) H-5->L+2 (6%), H-3->L+4 (3%)                                                                                                |
| 27  | 50198.33455                | 199.21         | 0.0148 | H-5->L+2 (28%), H-1->L+7 (32%), H-8->LUMO (2%), H-5->L+1 (5%), H-4->L+2 (2%), H-3->L+1 (4%), H-3->L+2 (2%), H-3->L+3 (2%), H-2->L+1 (3%), H-1->L+4 (5%)                    |
| 28  | 50412.07148                | 198.37         | 0.0187 | H-5->L+2 (28%), H-4->L+2 (12%), H-1->L+7 (20%), H-8->LUMO (4%), H-7->LUMO (4%), H-5->L+1 (5%), H-4->L+1 (2%), H-2->L+1 (8%), H-1->L+4 (4%)                                 |
| 29  | 50950.84983                | 196.27         | 0.1316 | H-2->L+3 (81%) H-8->LUMO (3%), H-4->L+1 (4%), HOMO->L+9 (2%)                                                                                                               |
| 30  | 51004.88898                | 196.06         | 0.0003 | H-1->L+8 (87%) H-1->L+6 (4%)                                                                                                                                               |
| 31  | 51545.28045                | 194.00         | 0.0028 | H-4->L+1 (14%), H-4->L+2 (36%), HOMO->L+9 (24%) H-8->LUMO (2%), H-5->L+2 (7%), H-1->L+8 (2%)                                                                               |
| 32  | 51641.26043                | 193.64         | 0.0074 | H-4->L+2 (15%), HOMO->L+9 (66%) H-8->LUMO (2%), H-5->L+2 (5%)                                                                                                              |
| 33  | 52452.65418                | 190.65         | 0.0007 | H-5->L+1 (56%), H-5->L+3 (17%), H-4->L+1 (11%) H-5->L+2 (6%), H-4->L+2 (4%), H-4->L+3 (4%)                                                                                 |
| 34  | 52647.0338                 | 189.94         | 0.0015 | H-8->LUMO (13%), H-4->L+1 (29%), HOMO->L+10 (19%) H-9->LUMO (9%), H-5->L+1 (4%), H-4->L+2 (7%), H-4->L+3 (6%)                                                              |
| 35  | 52822.05611                | 189.31         | 0.0085 | HOMO->L+10 (69%) H-8->LUMO (5%), H-4->L+1 (6%), H-4->L+2 (3%)                                                                                                              |
| 36  | 53068.05521                | 188.44         | 0.0002 | H-3->L+1 (13%), H-3->L+3 (73%) H-3->L+2 (9%)                                                                                                                               |
| 37  | 53280.17903                | 187.69         | 0.0076 | H-1->L+9 (83%) H-9->LUMO (4%), H-8->LUMO (4%)                                                                                                                              |
| 38  | 53524.56502                | 186.83         | 0.0075 | HOMO->L+11 (82%) H-9->LUMO (4%), H-8->LUMO (3%)                                                                                                                            |
| 39  | 53864.93099                | 185.65         | 0.0777 | H-8->LUMO (34%), H-4->L+1 (12%), H-4->L+3 (13%) H-9->LUMO (3%), H-6->L+2 (5%), H-5->L+1 (3%), H-4->L+2 (2%), H-2->L+1 (2%), H-2->L+3 (2%), H-1->L+9 (6%), HOMO->L+11 (3%)  |
| 40  | 54040.75985                | 185.05         | 0.0115 | H-9->LUMO (38%), HOMO->L+12 (31%) H-6->L+1 (2%), H-6->L+2 (6%), H-4->L+1 (3%), HOMO->L+11 (4%)                                                                             |
| 41  | 54119.80219                | 184.78         | 0.0062 | H-6->L+2 (22%), HOMO->L+12 (47%) H-9->LUMO (5%), H-6->L+1 (5%), H-5->L+2 (2%), HOMO->L+11 (4%)                                                                             |
| 42  | 54272.24097                | 184.26         | 0.1212 | H-9->LUMO (19%), H-6->L+2 (31%) H-8->LUMO (3%), H-6->L+1 (3%), H-5->L+1 (2%), H-4->L+1 (4%), H-3->L+6 (2%), H-2->L+3 (3%), H-2->L+4 (5%), HOMO->L+12 (8%), HOMO->L+13 (4%) |
| 43  | 54584.37754                | 183.20         | 0.0426 | H-2->L+4 (55%), H-2->L+5 (16%) H-1->L+10 (6%), HOMO->L+13 (4%), HOMO->L+14 (3%)                                                                                            |
| 44  | 54835.21596                | 182.36         | 0.0101 | H-1->L+10 (68%), H-1->L+11 (14%) H-2->L+4 (5%), H-1->L+13 (3%)                                                                                                             |
| 45  | 54866.67159                | 182.26         | 0.0562 | H-2->L+4 (24%), H-2->L+5 (38%), HOMO->L+13 (23%)                                                                                                                           |
| 46  | 55042.50045                | 181.68         | 0.0006 | H-5->L+1 (13%), H-5->L+3 (64%) H-9->LUMO (2%), H-5->L+2 (5%), H-4->L+3 (7%)                                                                                                |
| 47  | 55319.95518                | 180.77         | 0.0377 | H-2->L+5 (31%), HOMO->L+13 (47%) HOMO->L+12 (4%), HOMO->L+14 (4%)                                                                                                          |
| 48  | 55437.71212                | 180.38         | 0.0034 | H-1->L+10 (14%), H-1->L+11 (63%) H-1->L+12 (7%), HOMO->L+13 (3%)                                                                                                           |
| 49  | 55645.80317                | 179.71         | 0.0366 | H-10->LUMO (11%), H-6->L+1 (33%), H-6->L+3 (11%), H-4->L+3 (17%), H-11->LUMO (4%), H-8->LUMO (2%), H-6->L+2 (3%), H-1->L+11 (2%)                                           |
| 50  | 55858.73353                | 179.02         | 0.0237 | H-10->LUMO (62%) H-11->LUMO (8%), H-6->L+1 (9%), H-3->L+4 (2%)                                                                                                             |

**Table SI.4.** Theoretical data of the 50 electronic transitions calculated for the cationic species of 6-nitroharimine (**8C**).

| No. | Energy (cm <sup>-1</sup> ) | λ (nm) | Osc.   | Symmetry (% contribs)                                                                                                                                       |
|-----|----------------------------|--------|--------|-------------------------------------------------------------------------------------------------------------------------------------------------------------|
| 1   | 26890.52466                | 371.88 | 0.0535 | HOMO->LUMO (79%), HOMO->L+1 (10%) H-1->LUMO (9%)                                                                                                            |
| 2   | 28109.22841                | 355.76 | 0.0627 | H-1->LUMO (72%), HOMO->LUMO (13%) H-2->LUMO (3%), H-1->L+1 (5%), HOMO->L+1 (3%)                                                                             |
| 3   | 30537.76379                | 327.46 | 0.1159 | H-1->L+1 (70%), HOMO->L+1 (14%) HOMO->LUMO (4%), HOMO->L+2 (2%)                                                                                             |
| 4   | 31637.90403                | 316.08 | 0.5066 | H-1->L+1 (16%), HOMO->L+1 (65%) H-1->LUMO (8%), H-1->L+2 (3%), HOMO->LUMO (3%)                                                                              |
| 5   | 34437.45446                | 290.38 | 0.0983 | H-3->LUMO (34%), H-3->L+1 (11%), H-2->LUMO (27%) H-4->LUMO (3%), H-2->L+1 (5%), H-1->LUMO (7%), H-1->L+1 (4%), HOMO->L+1 (4%)                               |
| 6   | 36233.65117                | 275.99 | 0.0074 | H-5->LUMO (18%), H-4->LUMO (28%), H-3->LUMO (21%) H-5->L+1 (5%), H-4->L+1 (9%), H-3->L+1 (6%), H-2->LUMO (5%)                                               |
| 7   | 39415.50839                | 253.71 | 0.0546 | H-2->LUMO (38%), H-2->L+1 (18%), HOMO->L+2 (21%) H-4->LUMO (6%), H-3->LUMO (5%), H-1->L+2 (4%), HOMO->L+3 (4%)                                              |
| 8   | 40673.7333                 | 245.86 | 0.0508 | H-4->LUMO (10%), H-2->LUMO (19%), HOMO->L+2 (39%) H-3->LUMO (7%), H-2->L+1 (8%), H-1->L+2 (4%), H-1->L+3 (3%)                                               |
| 9   | 41244.77384                | 242.45 | 0.0549 | H-2->L+1 (39%), H-1->L+2 (16%), HOMO->L+2 (15%), HOMO->L+3 (12%) H-4->LUMO (4%), H-3->LUMO (2%), H-1->L+3 (5%)                                              |
| 10  | 41696.44432                | 239.83 | 0.5151 | H-1->L+2 (62%), HOMO->L+2 (19%) H-4->L+1 (3%), H-2->L+1 (7%)                                                                                                |
| 11  | 43654.75847                | 229.07 | 0.0125 | H-2->L+1 (15%), H-1->L+3 (27%), HOMO->L+3 (37%) H-4->LUMO (2%), H-4->L+1 (2%), H-1->L+2 (3%), HOMO->L+6 (4%)                                                |
| 12  | 44448.40803                | 224.98 | 0.0338 | H-1->L+3 (52%), HOMO->L+3 (35%) H-3->L+1 (2%), H-2->LUMO (3%), HOMO->L+6 (2%)                                                                               |
| 13  | 45300.93606                | 220.75 | 0.0295 | H-5->LUMO (28%), H-4->LUMO (28%), H-3->LUMO (10%), H-3->L+1 (18%) H-5->L+1 (8%)                                                                             |
| 14  | 45539.67617                | 219.59 | 0.031  | H-5->LUMO (21%), H-3->LUMO (11%), H-3->L+1 (49%) H-6->LUMO (2%), H-4->LUMO (6%), H-4->L+1 (2%)                                                              |
| 15  | 46483.34485                | 215.13 | 0.0312 | H-4->L+1 (28%), HOMO->L+4 (49%) H-5->LUMO (5%), H-5->L+1 (2%), H-4->LUMO (3%), H-1->L+4 (3%), HOMO->L+5 (3%)                                                |
| 16  | 46508.34804                | 215.02 | 0.041  | H-4->L+1 (37%), HOMO->L+4 (37%) H-5->LUMO (6%), H-5->L+1 (3%), H-4->LUMO (4%), H-1->L+4 (2%)                                                                |
| 17  | 47793.18924                | 209.23 | 0.004  | H-1->L+4 (86%) HOMO->L+4 (3%), HOMO->L+5 (4%)                                                                                                               |
| 18  | 48163.39773                | 207.63 | 0.0057 | H-6->LUMO (55%), H-6->L+1 (30%) H-5->LUMO (3%), H-5->L+1 (9%)                                                                                               |
| 19  | 48396.49196                | 206.63 | 0.1796 | H-5->L+1 (49%), HOMO->L+6 (14%) H-7->LUMO (3%), H-6->LUMO (6%), H-6->L+1 (5%), H-5->LUMO (6%), H-4->L+1 (8%), H-2->L+2 (4%)                                 |
| 20  | 49198.20706                | 203.26 | 0.0062 | HOMO->L+5 (86%) HOMO->L+4 (7%)                                                                                                                              |
| 21  | 50046.70232                | 199.81 | 0.1694 | H-2->L+2 (24%), HOMO->L+6 (42%) H-8->LUMO (9%), H-8->L+1 (3%), H-6->LUMO (3%), H-6->L+1 (8%), H-5->L+1 (2%)                                                 |
| 22  | 50068.47929                | 199.73 | 0.0004 | H-1->L+5 (21%), HOMO->L+7 (67%) H-1->L+4 (3%), HOMO->L+9 (3%)                                                                                               |
| 23  | 50347.54712                | 198.62 | 0.0899 | H-8->LUMO (23%), H-7->LUMO (10%), H-6->L+1 (19%) H-8->L+1 (7%), H-6->LUMO (4%), H-5->L+1 (3%), H-2->L+2 (8%), H-1->L+6 (9%), HOMO->L+6 (8%)                 |
| 24  | 50589.51345                | 197.67 | 0.0009 | H-1->L+5 (68%), HOMO->L+7 (21%) HOMO->L+8 (3%)                                                                                                              |
| 25  | 50775.02097                | 196.95 | 0.0267 | H-7->LUMO (57%), H-1->L+6 (13%) H-8->LUMO (7%), H-6->L+1 (3%), H-5->L+1 (3%), H-2->L+2 (4%), HOMO->L+6 (3%)                                                 |
| 26  | 51223.46523                | 195.22 | 0.0025 | H-1->L+7 (83%) H-1->L+6 (7%)                                                                                                                                |
| 27  | 51564.63775                | 193.93 | 0.0791 | H-7->LUMO (15%), H-1->L+6 (56%) H-2->L+3 (9%), H-1->L+7 (8%)                                                                                                |
| 28  | 52228.43205                | 191.47 | 0.0007 | HOMO->L+8 (81%) HOMO->L+7 (3%), HOMO->L+9 (4%), HOMO->L+11 (5%)                                                                                             |
| 29  | 52451.84763                | 190.65 | 0.0361 | H-8->LUMO (41%), H-7->L+1 (16%), H-6->LUMO (12%), H-6->L+1 (17%) H-2->L+2 (2%)                                                                              |
| 30  | 52782.53494                | 189.46 | 0.0384 | H-7->L+1 (70%) H-8->LUMO (7%), H-6->LUMO (2%), H-6->L+1 (4%), H-2->L+3 (3%)                                                                                 |
| 31  | 53177.74661                | 188.05 | 0.0201 | HOMO->L+8 (10%), HOMO->L+9 (57%), HOMO->L+11 (14%) H-2->L+2 (4%)                                                                                            |
| 32  | 53689.10212                | 186.26 | 0.0009 | H-1->L+8 (88%) H-1->L+5 (2%)                                                                                                                                |
| 33  | 54097.21866                | 184.85 | 0.0932 | H-2->L+2 (26%), H-2->L+3 (15%), HOMO->L+10 (18%) H-7->LUMO (2%), H-7->L+1 (2%), H-5->L+1 (3%), H-4->L+3 (2%), H-1->L+3 (2%), HOMO->L+6 (8%), HOMO->L+9 (5%) |
| 34  | 54219.81494                | 184.43 | 0.0056 | H-8->L+1 (71%) H-9->L+1 (2%), H-8->LUMO (3%), H-6->L+1 (2%), H-2->L+3 (5%)                                                                                  |
| 35  | 54609.38072                | 183.12 | 0.0182 | H-2->L+3 (13%), H-1->L+9 (28%) H-8->L+1 (8%), H-2->L+2 (6%), H-1->L+11 (8%), HOMO->L+6 (2%), HOMO->L+9 (8%), HOMO->L+10 (8%), HOMO->L+11 (4%)               |
| 36  | 54789.24236                | 182.52 | 0.0148 | H-1->L+9 (39%), H-1->L+11 (10%), HOMO->L+10 (21%) H-2->L+2 (6%), H-2->L+3 (5%), HOMO->L+6 (2%), HOMO->L+11 (2%)                                             |
| 37  | 55043.30701                | 181.68 | 0.012  | HOMO->L+9 (14%), HOMO->L+11 (67%) H-2->L+2 (2%), HOMO->L+10 (2%)                                                                                            |
| 38  | 55525.62656                | 180.10 | 0.1341 | H-2->L+3 (34%), HOMO->L+10 (43%) H-7->LUMO (3%), H-1->L+6 (3%), H-1->L+9 (4%)                                                                               |
| 39  | 55913.57924                | 178.85 | 0.0023 | H-1->L+9 (20%), H-1->L+11 (67%) H-1->L+12 (2%)                                                                                                              |
| 40  | 56251.52554                | 177.77 | 0.0141 | H-1->L+10 (90%) HOMO->L+14 (3%)                                                                                                                             |
| 41  | 56750.78273                | 176.21 | 0.0006 | HOMO->L+12 (54%), HOMO->L+13 (29%) H-2->L+4 (4%)                                                                                                            |
| 42  | 56862.08724                | 175.86 | 0.0198 | H-9->LUMO (24%), H-3->L+2 (44%) H-4->L+2 (4%), H-4->L+3 (4%), H-3->L+3 (9%)                                                                                 |
| 43  | 57047.59476                | 175.29 | 0.0013 | H-9->LUMO (50%), H-3->L+2 (20%) H-11->LUMO (4%), H-11->L+1 (4%), H-9->L+1 (5%), H-8->L+1 (2%)                                                               |
| 44  | 57431.51467                | 174.12 | 0.0044 | H-4->L+2 (67%) H-11->LUMO (2%), H-3->L+2 (4%), H-2->L+6 (3%), HOMO->L+14 (8%)                                                                               |
| 45  | 57548.46506                | 173.77 | 0.0024 | HOMO->L+12 (34%), HOMO->L+13 (57%) H-1->L+13 (2%)                                                                                                           |
| 46  | 57669.44823                | 173.40 | 0.0052 | H-2->L+4 (64%) H-11->LUMO (3%), H-1->L+12 (9%), H-1->L+13 (3%), HOMO->L+12 (5%), HOMO->L+13 (3%)                                                            |
| 47  | 57758.16922                | 173.14 | 0.0054 | H-11->LUMO (31%), H-11->L+1 (16%), HOMO->L+14 (27%) H-10->LUMO (6%), H-9->LUMO (5%), H-2->L+4 (5%)                                                          |
| 48  | 57808.17559                | 172.99 | 0.0221 | H-11->LUMO (12%), H-4->L+2 (10%), HOMO->L+14 (55%) H-11->L+1 (7%), H-10->LUMO (3%), H-1->L+10 (2%)                                                          |
| 49  | 58159.02677                | 171.94 | 0.0014 | H-2->L+4 (15%), H-1->L+12 (40%), H-1->L+13 (28%) HOMO->L+15 (4%)                                                                                            |
| 50  | 58534.88113                | 170.84 | 0.0269 | H-10->LUMO (13%), H-5->L+2 (24%), H-3->L+2 (13%), H-3->L+3 (22%) H-5->L+3 (4%), H-4->L+3 (7%), H-2->L+6 (3%)                                                |

**Table SI.5.** Theoretical data of the 50 electronic transitions calculated for the cationic species of 8-nitroharimine (**9C**).

| No. | Energy (cm <sup>-1</sup> ) | λ (nm) | Osc.   | Symmetry (% contribs)                                                                                          |                |
|-----|----------------------------|--------|--------|----------------------------------------------------------------------------------------------------------------|----------------|
|     |                            |        |        | HOMO->LUMO (95%)                                                                                               | HOMO->L+1 (2%) |
| 1   | 25255.63884                | 395.95 | 0.0958 | HOMO->LUMO (95%) HOMO->L+1 (2%)                                                                                |                |
| 2   | 27977.76003                | 357.43 | 0.1098 | H-1->LUMO (94%)                                                                                                |                |
| 3   | 30527.27858                | 327.58 | 0.1715 | HOMO->L+1 (91%) H-1->L+1 (3%), H-1->L+2 (3%)                                                                   |                |
| 4   | 32525.1139                 | 307.45 | 0.0693 | H-4->LUMO (16%), H-3->LUMO (26%), H-2->LUMO (23%), H-1->L+1 (21%) H-4->L+1 (2%), H-3->L+1 (2%), H-2->L+1 (2%), |                |
| 5   | 33355.86497                | 299.80 | 0.2774 | H-1->L+1 (69%) H-4->LUMO (5%), H-3->LUMO (9%), H-2->LUMO (8%), HOMO->L+1 (2%), HOMO->L+2 (3%)                  |                |
| 6   | 36227.19873                | 276.04 | 0.0038 | H-6->LUMO (11%), H-5->LUMO (24%), H-4->LUMO (44%) H-5->L+1 (3%), H-4->L+1 (3%), H-3->LUMO (3%), H-2->LUMO (6%) |                |
| 7   | 37886.28119                | 263.95 | 0.0387 | H-3->LUMO (21%), H-2->LUMO (60%) H-6->LUMO (5%), H-5->LUMO (5%), H-4->LUMO (2%), H-3->L+1 (2%)                 |                |
| 8   | 40110.75831                | 249.31 | 0.1109 | H-2->L+1 (17%), HOMO->L+2 (72%) H-1->L+2 (3%)                                                                  |                |
| 9   | 41659.34281                | 240.04 | 0.269  | H-2->L+1 (60%), HOMO->L+2 (16%) H-1->L+2 (5%), H-1->L+3 (3%), HOMO->L+3 (5%)                                   |                |
| 10  | 42123.91816                | 237.39 | 0.0236 | H-6->LUMO (17%), H-5->LUMO (11%), H-4->LUMO (18%), H-3->LUMO (31%) H-8->LUMO (4%), H-7->LUMO (4%), H-1->L+2 (  |                |
| 11  | 42871.59412                | 233.25 | 0.3353 | H-1->L+2 (72%) H-6->LUMO (2%), H-4->LUMO (3%), H-3->L+1 (6%), H-2->L+1 (5%), HOMO->L+1 (2%)                    |                |
| 12  | 44098.36341                | 226.77 | 0.0074 | HOMO->L+3 (79%) H-2->L+1 (8%), H-1->L+5 (4%)                                                                   |                |
| 13  | 45496.12223                | 219.80 | 0.1916 | H-3->L+1 (71%) H-6->LUMO (2%), H-4->LUMO (3%), H-4->L+1 (4%), H-3->LUMO (3%), H-1->L+2 (4%), H-1->L+3 (6%)     |                |
| 14  | 46008.28429                | 217.35 | 0.0344 | H-8->LUMO (14%), H-7->LUMO (57%), H-6->LUMO (21%) H-4->L+1 (3%)                                                |                |
| 15  | 46830.96981                | 213.53 | 0.0316 | H-1->L+3 (70%) H-3->L+1 (6%), HOMO->L+3 (3%), HOMO->L+4 (4%), HOMO->L+5 (5%)                                   |                |
| 16  | 47128.5884                 | 212.19 | 0.0091 | HOMO->L+4 (86%) H-1->L+3 (3%), HOMO->L+6 (5%)                                                                  |                |
| 17  | 47268.92887                | 211.56 | 0.0385 | H-4->L+1 (74%) H-7->LUMO (9%), H-4->LUMO (4%), H-1->L+3 (2%)                                                   |                |
| 18  | 47628.65214                | 209.96 | 0.0436 | H-6->LUMO (18%), H-5->LUMO (38%), H-5->L+1 (26%) H-7->LUMO (6%), H-4->L+1 (2%), H-1->L+3 (3%)                  |                |
| 19  | 48269.05636                | 207.17 | 0.0074 | H-8->LUMO (39%), HOMO->L+5 (35%) H-7->LUMO (7%), H-5->LUMO (2%), H-5->L+1 (5%), H-1->L+3 (3%)                  |                |
| 20  | 48791.70363                | 204.95 | 0.0022 | H-1->L+4 (81%) H-8->LUMO (3%), H-1->L+6 (2%), HOMO->L+6 (8%)                                                   |                |
| 21  | 49541.79925                | 201.85 | 0.0947 | H-8->LUMO (20%), H-1->L+5 (10%), HOMO->L+5 (35%) H-7->LUMO (5%), H-5->L+1 (4%), H-2->L+2 (4%), H-1->L+3 (3%)   |                |
| 22  | 49774.08692                | 200.91 | 0.0568 | H-6->L+1 (41%), H-5->L+1 (20%), H-2->L+2 (10%) H-8->LUMO (6%), H-7->L+1 (2%), H-6->LUMO (8%), HOMO->L+6 (4%)   |                |
| 23  | 49855.54892                | 200.58 | 0.0365 | HOMO->L+6 (69%) H-8->LUMO (3%), H-6->L+1 (5%), H-1->L+4 (5%), H-1->L+5 (7%), HOMO->L+4 (6%)                    |                |
| 24  | 50253.98681                | 198.99 | 0.1478 | H-2->L+2 (14%), H-1->L+5 (53%) H-8->LUMO (4%), H-7->LUMO (4%), H-6->L+1 (2%), HOMO->L+3 (3%), HOMO->L+5 (8%),  |                |
| 25  | 50678.23444                | 197.32 | 0.0065 | HOMO->L+7 (92%)                                                                                                |                |
| 26  | 51304.92723                | 194.91 | 0.061  | H-7->L+1 (22%), H-6->L+1 (16%), H-5->L+1 (20%), H-2->L+2 (23%) H-6->LUMO (4%), H-5->LUMO (3%), H-1->L+6 (3%)   |                |
| 27  | 51626.74245                | 193.70 | 0.0024 | H-1->L+6 (80%) H-7->L+1 (4%), H-1->L+4 (2%), H-1->L+5 (3%), HOMO->L+8 (4%)                                     |                |
| 28  | 51940.49212                | 192.53 | 0.0616 | H-7->L+1 (57%), H-5->L+1 (16%) H-6->LUMO (3%), H-6->L+1 (7%), H-5->LUMO (6%)                                   |                |
| 29  | 52838.1872                 | 189.26 | 0.0051 | H-1->L+7 (93%)                                                                                                 |                |
| 30  | 53112.4157                 | 188.28 | 0.0016 | HOMO->L+8 (89%) H-1->L+6 (4%)                                                                                  |                |
| 31  | 53971.39617                | 185.28 | 0.0267 | H-8->L+1 (16%), H-2->L+2 (12%), HOMO->L+9 (20%), HOMO->L+10 (11%), HOMO->L+11 (11%) H-6->L+1 (7%), H-1->L+5 (  |                |
| 32  | 54190.77898                | 184.53 | 0.0098 | H-8->L+1 (13%), HOMO->L+9 (64%) H-6->L+1 (3%), H-2->L+2 (5%)                                                   |                |
| 33  | 54699.71482                | 182.82 | 0.0029 | H-9->LUMO (18%), H-8->L+1 (27%), HOMO->L+10 (25%) H-9->L+1 (3%), H-1->L+8 (7%), HOMO->L+9 (4%), HOMO->L+11 (   |                |
| 34  | 54772.30472                | 182.57 | 0.0238 | H-9->LUMO (54%), H-8->L+1 (23%) H-9->L+1 (7%), H-2->L+3 (3%)                                                   |                |
| 35  | 54985.23509                | 181.87 | 0.0677 | H-2->L+2 (12%), HOMO->L+10 (33%) H-9->LUMO (6%), H-8->L+1 (7%), H-7->L+1 (4%), H-6->L+1 (4%), H-3->L+2 (3%),   |                |
| 36  | 55119.12312                | 181.43 | 0.0274 | H-1->L+8 (71%) H-9->LUMO (2%), H-8->L+1 (3%), H-2->L+3 (8%)                                                    |                |
| 37  | 55261.0767                 | 180.96 | 0.0515 | H-3->L+2 (53%), H-2->L+3 (22%) H-3->L+3 (6%), H-1->L+8 (8%)                                                    |                |
| 38  | 55580.47226                | 179.92 | 0.0071 | HOMO->L+10 (17%), HOMO->L+11 (65%) H-3->L+2 (3%), H-2->L+3 (5%)                                                |                |
| 39  | 56007.13955                | 178.55 | 0.0254 | H-11->LUMO (13%), H-10->LUMO (53%) H-8->L+1 (3%), H-3->L+2 (7%), H-2->L+3 (9%), HOMO->L+11 (4%)                |                |
| 40  | 56420.90197                | 177.24 | 0.0026 | H-1->L+9 (81%) H-1->L+10 (3%), H-1->L+11 (4%)                                                                  |                |
| 41  | 56752.39584                | 176.20 | 0.013  | H-11->LUMO (25%), H-1->L+10 (31%) H-9->L+1 (3%), H-3->L+2 (5%), H-2->L+3 (6%), H-1->L+9 (4%), H-1->L+11 (3%),  |                |
| 42  | 56891.1232                 | 175.77 | 0.0069 | H-11->LUMO (38%), H-10->LUMO (13%), H-1->L+10 (31%) H-9->L+1 (4%)                                              |                |
| 43  | 57246.81371                | 174.68 | 0.0559 | H-10->LUMO (12%), H-2->L+3 (11%), H-1->L+11 (13%) H-4->L+2 (5%), H-3->L+2 (8%), H-1->L+9 (3%), H-1->L+10 (9%)  |                |
| 44  | 57353.27889                | 174.36 | 0.0045 | H-1->L+10 (13%), H-1->L+11 (55%), HOMO->L+14 (10%) HOMO->L+13 (4%)                                             |                |
| 45  | 57606.53698                | 173.59 | 0.0379 | H-4->L+2 (14%), HOMO->L+12 (41%), HOMO->L+14 (13%) H-10->LUMO (4%), H-4->L+3 (2%), H-3->L+2 (3%), H-2->L+3 (   |                |
| 46  | 57729.13326                | 173.22 | 0.0047 | H-4->L+2 (62%) H-11->LUMO (4%), H-10->LUMO (2%), H-4->L+3 (4%), H-3->L+2 (3%), H-2->L+3 (5%), HOMO->L+12 (4%)  |                |
| 47  | 57959.00127                | 172.54 | 0.008  | H-2->L+4 (13%), HOMO->L+13 (59%) H-2->L+3 (2%), H-1->L+9 (3%), H-1->L+11 (2%), HOMO->L+12 (8%)                 |                |
| 48  | 58157.41366                | 171.95 | 0.0026 | H-2->L+4 (36%), HOMO->L+12 (25%), HOMO->L+14 (13%) H-2->L+5 (5%), H-1->L+10 (3%), H-1->L+11 (4%), H-1->L+12    |                |
| 49  | 58296.94757                | 171.54 | 0.0037 | H-2->L+4 (32%), HOMO->L+13 (11%), HOMO->L+14 (43%) HOMO->L+12 (4%)                                             |                |
| 50  | 58438.0946                 | 171.12 | 0.003  | H-9->LUMO (12%), H-9->L+1 (71%) H-14->LUMO (2%), H-11->LUMO (8%)                                               |                |

**Table SI.6.** Theoretical data of the 50 electronic transitions calculated for the cationic species of 6,8-dinitroharimine (**10C**).

| No. | Energy (cm <sup>-1</sup> ) | $\lambda$ (nm) | Osc.   | Symmetry (% contribs)                                                                                                                                                          |
|-----|----------------------------|----------------|--------|--------------------------------------------------------------------------------------------------------------------------------------------------------------------------------|
| 1   | 26230.76314                | 381.23         | 0.131  | HOMO->LUMO (95%) H-1->L+2 (2%)                                                                                                                                                 |
| 2   | 27959.20928                | 357.66         | 0.068  | H-1->LUMO (91%) HOMO->L+1 (3%)                                                                                                                                                 |
| 3   | 28889.16654                | 346.15         | 0.1045 | HOMO->L+1 (76%) H-5->L+1 (2%), H-4->L+1 (2%), H-2->L+1 (5%), H-1->LUMO (2%), H-1->L+1 (9%)                                                                                     |
| 4   | 30966.04419                | 322.93         | 0.0164 | H-1->L+1 (74%), HOMO->L+2 (11%) H-2->L+1 (3%), HOMO->L+1 (4%)                                                                                                                  |
| 5   | 32219.42978                | 310.37         | 0.0524 | HOMO->L+2 (80%) H-4->LUMO (3%), H-1->L+1 (7%), H-1->L+3 (2%)                                                                                                                   |
| 6   | 32450.10434                | 308.17         | 0.0346 | H-5->LUMO (10%), H-4->LUMO (40%), H-2->LUMO (17%) H-4->L+1 (4%), H-4->L+2 (4%), H-3->LUMO (3%), H-1->L+1 (6%), HOMO->L+2 (3%)                                                  |
| 7   | 33948.68247                | 294.56         | 0.277  | H-2->L+1 (10%), H-1->L+2 (66%) H-5->L+1 (4%), H-4->LUMO (3%), H-4->L+1 (5%), HOMO->L+3 (2%)                                                                                    |
| 8   | 34912.51501                | 286.43         | 0.2185 | H-4->L+1 (14%), H-2->L+1 (20%), H-1->L+2 (20%), HOMO->L+1 (10%), H-6->L+1 (3%), H-5->L+1 (9%), H-3->LUMO (5%), H-3->L+1 (3%), H-2->LUMO (4%)                                   |
| 9   | 35348.05441                | 282.90         | 0.0315 | H-8->LUMO (13%), H-3->LUMO(32%), H-2->LUMO(10%), H-9->LUMO(8%), H-5->LUMO(9%), H-4->LUMO(4%), H-4->L+1(3%), H-2->L+1(4%), H-1->L+2(2%)                                         |
| 10  | 36257.04125                | 275.81         | 0.0071 | H-6->L+1 (23%), H-3->L+1 (45%) H-8->L+1 (7%), H-7->L+1 (2%), H-5->L+1 (9%), H-2->L+1 (3%)                                                                                      |
| 11  | 37018.42863                | 270.14         | 0.0217 | H-4->LUMO (10%), H-2->LUMO (63%) H-9->LUMO (5%), H-8->LUMO (4%), H-3->LUMO (9%)                                                                                                |
| 12  | 39653.44195                | 252.18         | 0.0138 | H-9->LUMO (13%), H-8->LUMO (16%), H-3->LUMO (44%) H-10->LUMO (2%), H-7->LUMO (3%), H-5->LUMO (7%), H-4->LUMO (5%)                                                              |
| 13  | 41072.97774                | 243.47         | 0.0168 | H-5->LUMO (15%), H-4->LUMO (13%), H-4->L+1 (11%), H-2->L+1 (28%), H-2->L+2 (10%), H-6->LUMO(3%), H-5->L+1(5%), H-1->L+3(3%), HOMO->L+3(4%)                                     |
| 14  | 41610.94955                | 240.32         | 0.0492 | H-5->LUMO (15%), H-2->L+2 (56%) H-9->LUMO (4%), H-6->LUMO (4%), H-4->LUMO (2%), H-1->L+3 (6%), HOMO->L+3 (5%)                                                                  |
| 15  | 41751.29002                | 239.51         | 0.0281 | H-5->LUMO (20%), H-5->L+1(10%), H-4->L+1(15%), H-2->L+1 (22%), H-9->LUMO(3%), H-4->LUMO (7%), H-4->L+2 (2%), H-2->L+2(6%), HOMO->L+3(3%)                                       |
| 16  | 42578.81486                | 234.86         | 0.1006 | H-6->LUMO (72%), HOMO->L+3 (11%) H-8->LUMO (5%), H-5->LUMO (8%)                                                                                                                |
| 17  | 42791.74523                | 233.69         | 0.2794 | H-6->LUMO (12%), H-2->L+2 (10%), HOMO->L+3 (58%) H-3->L+2 (5%), H-1->L+2 (2%), H-1->L+4 (3%), HOMO->L+4 (2%)                                                                   |
| 18  | 43644.27326                | 229.13         | 0.1041 | H-7->LUMO (13%), H-1->L+3 (58%) H-8->LUMO (3%), H-5->LUMO (2%), H-3->L+2 (6%), H-2->L+2 (4%)                                                                                   |
| 19  | 43812.84314                | 228.24         | 0.0314 | H-7->LUMO (26%), H-6->L+1 (13%), H-3->L+1 (19%), H-10->L+1 (4%), H-9->LUMO (7%), H-8->L+1 (3%), H-7->L+1 (2%), H-3->L+2 (4%), H-1->L+3 (9%)                                    |
| 20  | 44166.11398                | 226.42         | 0.0285 | H-9->LUMO (12%), H-7->LUMO (24%), H-6->L+1 (14%), H-3->L+1 (23%), H-10->L+1(4%), H-8->L+1 (3%), H-7->L+1 (3%), H-3->L+2 (5%), H-1->L+3 (3%)                                    |
| 21  | 45051.71074                | 221.97         | 0.0805 | H-4->L+2 (16%), H-3->L+2 (15%), HOMO->L+4 (39%) H-5->LUMO (3%), H-5->L+1 (4%), H-4->L+1 (6%), H-2->L+2 (4%), H-1->L+3 (4%)                                                     |
| 22  | 45324.32614                | 220.63         | 0.0585 | H-4->L+1 (10%), H-4->L+2 (26%), H-3->L+2 (31%), H-8->LUMO (2%), H-7->LUMO (3%), H-5->L+1 (9%), H-4->LUMO (2%), HOMO->L+4 (6%)                                                  |
| 23  | 45494.50912                | 219.81         | 0.152  | H-4->L+2(10%), H-3->L+2(18%), H-1->L+4(12%), HOMO->L+4(23%), H-9->L+2(2%), H-5->L+2(3%), H-1->L+3(4%), H-1->L+5(2%), HOMO->L+3(7%), HOMO->L+5(2%)                              |
| 24  | 45791.32115                | 218.38         | 0.0189 | H-5->L+1 (36%), H-4->L+1 (17%), H-4->L+2 (25%) H-6->L+1 (5%), H-3->L+2 (3%), HOMO->L+4 (3%)                                                                                    |
| 25  | 46168.78862                | 216.60         | 0.0566 | H-10->LUMO (61%), H-9->LUMO (14%) H-11->LUMO (4%), H-8->LUMO (4%), H-7->LUMO (5%), H-1->L+4 (2%)                                                                               |
| 26  | 46762.41268                | 213.85         | 0.0079 | H-10->LUMO (14%), H-8->LUMO (17%), H-1->L+4 (34%) H-8->L+2 (4%), H-7->LUMO (5%), H-5->L+2 (4%), HOMO->L+4 (5%)                                                                 |
| 27  | 46905.97937                | 213.19         | 0.0352 | H-9->LUMO (11%), H-8->LUMO (18%), H-1->L+4 (33%), H-10->LUMO (3%), H-8->L+2 (4%), H-7->LUMO (7%), H-7->L+2 (3%), HOMO->L+4 (6%)                                                |
| 28  | 48181.94848                | 207.55         | 0.0215 | H-5->L+2 (72%) H-10->LUMO (2%), H-6->L+2 (3%), H-4->L+2 (6%), H-1->L+4 (2%), HOMO->L+5 (5%)                                                                                    |
| 29  | 48739.27759                | 205.17         | 0.0017 | H-8->L+1 (60%), H-7->L+1 (14%) H-9->L+1 (5%), H-7->L+2 (5%), H-6->L+1 (4%), H-6->L+2 (2%)                                                                                      |
| 30  | 49249.82654                | 203.05         | 0.0114 | H-9->L+1 (46%), H-8->L+2 (16%), H-7->L+1 (14%) H-9->LUMO (5%), H-9->L+2 (4%), H-6->L+2 (6%)                                                                                    |
| 31  | 49384.52113                | 202.49         | 0.0015 | H-11->LUMO (41%), HOMO->L+5 (30%) H-10->L+1 (5%), H-8->L+1 (3%), H-7->L+1 (3%)                                                                                                 |
| 32  | 49461.1438                 | 202.18         | 0.0343 | H-8->L+2 (15%), H-6->L+2 (67%) H-6->L+1 (3%), H-5->L+2 (6%)                                                                                                                    |
| 33  | 49736.17886                | 201.06         | 0.0133 | H-9->L+1 (25%), H-9->L+2 (15%), H-8->L+2 (13%), H-7->L+2 (16%), HOMO->L+6 (12%) H-6->L+2 (9%)                                                                                  |
| 34  | 49783.76558                | 200.87         | 0.0052 | HOMO->L+6 (74%) H-9->L+1 (4%), H-9->L+2 (3%), H-8->L+2 (3%), H-7->L+2 (4%), H-1->L+6 (4%)                                                                                      |
| 35  | 50020.89258                | 199.92         | 0.0068 | H-11->LUMO (16%), H-10->L+1 (34%), H-7->L+1 (21%) H-11->L+1 (2%), H-9->L+1 (8%), H-8->L+1 (8%), HOMO->L+5 (2%)                                                                 |
| 36  | 50495.14658                | 198.04         | 0.1964 | H-9->L+2 (28%), H-7->L+2 (18%), H-1->L+5 (41%)                                                                                                                                 |
| 37  | 50664.52301                | 197.38         | 0.0361 | H-11->LUMO (13%), H-2->L+3 (15%), H-1->L+5 (12%), H-1->L+6 (12%), HOMO->L+5 (19%), H-10->LUMO(2%), H-9->L+2(3%), H-7->L+2(8%), HOMO->L+4(2%)                                   |
| 38  | 50852.45019                | 196.65         | 0.0073 | H-7->L+2(13%), H-2->L+3(12%), H-1->L+5(11%), H-1->L+6(33%), H-11->LUMO(2%), H-10->L+1(3%), H-9->L+2(4%), H-1->L+7(3%), HOMO->L+5(7%), HOMO->L+7(2%)                            |
| 39  | 51236.3701                 | 195.17         | 0.0419 | H-11->LUMO (10%), H-1->L+6 (36%), HOMO->L+5 (21%) H-10->L+1 (3%), H-7->L+2 (4%), H-1->L+5 (2%), HOMO->L+6 (5%)                                                                 |
| 40  | 51867.09567                | 192.80         | 0.1026 | H-8->L+2(18%), H-7->L+2(14%), H-2->L+3(25%), H-10->L+2(6%), H-9->LUMO(2%), H-9->L+2(9%), H-8->LUMO(2%), H-8->L+1(2%), H-7->LUMO(2%)                                            |
| 41  | 52199.39609                | 191.57         | 0.0678 | H-10->L+1 (34%), H-7->L+1 (12%), H-6->L+1 (12%), H-11->L+1 (4%), H-9->L+1(2%), H-8->L+1(3%), H-8->L+2(3%), H-7->L+2(3%), H-3->L+3(6%), H-3->L+4(4%)                            |
| 42  | 52571.21768                | 190.22         | 0.0086 | HOMO->L+7 (81%) H-1->L+7 (3%), HOMO->L+6 (2%), HOMO->L+8 (3%), HOMO->L+9 (2%)                                                                                                  |
| 43  | 52980.94733                | 188.75         | 0.0182 | H-10->L+2 (73%) H-9->L+2 (4%), H-8->L+2 (7%), H-7->L+1 (3%)                                                                                                                    |
| 44  | 53420.5195                 | 187.19         | 0.0182 | H-11->L+1 (75%) H-11->L+2 (2%), H-2->L+4 (8%)                                                                                                                                  |
| 45  | 53647.96784                | 186.40         | 0.0031 | H-1->L+7 (65%), HOMO->L+8 (14%) H-1->L+6 (9%), H-1->L+10 (3%), HOMO->L+7 (2%)                                                                                                  |
| 46  | 53741.52816                | 186.08         | 0.0008 | H-1->L+7 (12%), HOMO->L+8 (78%) H-1->L+10 (3%)                                                                                                                                 |
| 47  | 54594.05619                | 183.17         | 0.0076 | H-9->L+2 (11%), H-2->L+3 (23%), H-1->L+5 (10%), H-13->LUMO (2%), H-12->LUMO (2%), H-11->L+2 (6%), H-10->L+2 (4%), H-8->L+2 (3%), H-2->L+4 (2%), H-1->L+8 (2%), HOMO->L+10 (5%) |
| 48  | 55092.50683                | 181.51         | 0.1307 | H-3->L+3 (19%), H-2->L+4 (34%), H-1->L+8 (12%), H-11->L+1 (3%), H-7->L+1 (3%), H-6->L+1 (3%), H-3->L+4 (6%), H-2->L+3 (3%), HOMO->L+10 (2%)                                    |
| 49  | 55154.61152                | 181.31         | 0.0195 | H-1->L+8 (75%) H-3->L+3 (4%), H-2->L+4 (7%), HOMO->L+10 (4%)                                                                                                                   |
| 50  | 55340.11904                | 180.70         | 0.0635 | H-3->L+3 (42%), H-2->L+4 (23%) H-13->LUMO (2%), H-12->LUMO (7%), H-11->L+2 (3%), H-3->L+4 (2%), H-2->L+3 (3%)                                                                  |

**Table SI.7.** Theoretical data of the 50 electronic transitions calculated for the neutral species of 6-bromoharmine (5N).

| No. | Energy (cm <sup>-1</sup> ) | $\lambda$ (nm) | Osc.   | Symmetry (% contribs)                                                                                                  |
|-----|----------------------------|----------------|--------|------------------------------------------------------------------------------------------------------------------------|
| 1   | 31633.87126                | 316.12         | 0.0676 | <b>HOMO-&gt;LUMO (93%), H-1-&gt;L+1 (5%)</b>                                                                           |
| 2   | 34176.13082                | 292.60         | 0.2509 | <b>H-1-&gt;LUMO (86%), HOMO-&gt;L+1 (11%)</b>                                                                          |
| 3   | 37454.77457                | 266.99         | 0.0008 | H-1->L+2 (15%), HOMO->L+2 (80%) H-2->L+2 (3%)                                                                          |
| 4   | 38975.93623                | 256.57         | 0.0026 | H-3->LUMO (94%) H-3->L+1 (3%)                                                                                          |
| 5   | 39321.94808                | 254.31         | 0.6989 | <b>HOMO-&gt;L+1 (82%), H-1-&gt;LUMO (7%), H-1-&gt;L+4 (5%)</b>                                                         |
| 6   | 39944.6081                 | 250.35         | 0.0001 | H-1->L+2 (82%), HOMO->L+2 (14%)                                                                                        |
| 7   | 40358.37052                | 247.78         | 0.2354 | <b>H-1-&gt;L+1 (72%), HOMO-&gt;L+4 (11%), H-2-&gt;LUMO (7%), HOMO-&gt;LUMO (3%)</b>                                    |
| 8   | 40659.21532                | 245.95         | 0.0002 | HOMO->L+3 (94%)                                                                                                        |
| 9   | 41616.59543                | 240.29         | 0.0715 | H-2->LUMO (68%), H-1->L+4 (12%) H-1->LUMO (2%),                                                                        |
| 10  | 42282.00283                | 236.51         | 0.0001 | H-1->L+3 (88%) HOMO->L+5 (3%), HOMO->L+6 (3%)                                                                          |
| 11  | 43663.63057                | 229.02         | 0.3366 | <b>HOMO-&gt;L+4 (66%), H-5-&gt;LUMO (3%), H-2-&gt;LUMO (9%), H-1-&gt;L+1 (9%), H-1-&gt;L+4 (3%), HOMO-&gt;L+8 (5%)</b> |
| 12  | 43712.02383                | 228.77         | 0.001  | HOMO->L+6 (89%) H-1->L+3 (5%), HOMO->L+5 (3%)                                                                          |
| 13  | 43941.08529                | 227.58         | 0.0094 | HOMO->L+5 (87%) H-1->L+3 (2%), HOMO->L+6 (4%)                                                                          |
| 14  | 45294.48362                | 220.78         | 0.0633 | H-2->LUMO (10%), H-1->L+4 (74%) HOMO->L+4 (6%)                                                                         |
| 15  | 45422.72578                | 220.15         | 0.0014 | H-1->L+5 (89%) H-1->L+6 (5%)                                                                                           |
| 16  | 45615.49229                | 219.22         | 0.0006 | H-3->L+1 (62%), H-3->L+4 (32%) H-1->L+6 (3%)                                                                           |
| 17  | 45675.98387                | 218.93         | 0.0039 | H-1->L+6 (84%) H-3->L+1 (3%), H-1->L+5 (5%), H                                                                         |
| 18  | 46936.62844                | 213.05         | 0.0019 | HOMO->L+7 (89%) H-1->L+6 (3%)                                                                                          |
| 19  | 47595.58341                | 210.10         | 0.171  | <b>HOMO-&gt;L+8 (75%), H-5-&gt;LUMO (4%), H-1-&gt;L+1 (2%), H-1-&gt;L+8 (4%), HOMO-&gt;L+10 (6%)</b>                   |
| 20  | 47739.95665                | 209.47         | 0.0002 | H-4->LUMO (81%), H-2->L+2 (10%) H-4->L+1 (2%),                                                                         |
| 21  | 47898.04132                | 208.78         | 0.0002 | H-4->LUMO (15%), H-2->L+2 (50%), HOMO->L+9 (24%)                                                                       |
| 22  | 48302.12509                | 207.03         | 0.0038 | H-2->L+2 (29%), HOMO->L+9 (61%) H-1->L+7 (3%)                                                                          |
| 23  | 48390.03952                | 206.65         | 0.0018 | H-2->L+1 (61%), H-1->L+8 (22%) H-5->LUMO (5%),                                                                         |
| 24  | 48580.38637                | 205.84         | 0.0001 | H-1->L+7 (88%) H-1->L+11 (3%), HOMO->L+9 (4%)                                                                          |
| 25  | 48679.59256                | 205.42         | 0.076  | H-5->LUMO (25%), H-1->L+8 (18%), HOMO->L+8 (11%), HOMO                                                                 |
| 26  | 49029.63718                | 203.96         | 0.0925 | H-5->LUMO (40%), HOMO->L+10 (44%) H-2->L+4 (3%)                                                                        |
| 27  | 49332.0951                 | 202.71         | 0.0009 | HOMO->L+11 (87%) HOMO->L+12 (4%), HOMO->L+14 (3)                                                                       |
| 28  | 49838.61128                | 200.65         | 0.0034 | H-1->L+9 (91%) HOMO->L+14 (2%)                                                                                         |
| 29  | 50381.42241                | 198.49         | 0.0003 | H-1->L+10 (77%) H-2->L+4 (4%), H-1->L+8 (9%),                                                                          |
| 30  | 50568.54304                | 197.75         | 0.0047 | H-2->L+3 (63%), HOMO->L+12 (17%) HOMO->L+14 (4%)                                                                       |
| 31  | 50625.8084                 | 197.53         | 0.0461 | H-6->LUMO (33%), H-2->L+1 (16%), H-2->L+4 (16%), H-1-                                                                  |
| 32  | 50675.00822                | 197.34         | 0.0013 | H-3->L+1 (29%), H-3->L+4 (62%) H-3->LUMO (3%)                                                                          |
| 33  | 50964.56126                | 196.21         | 0.0069 | H-1->L+11 (80%) H-2->L+3 (5%), H-1->L+7 (3%),                                                                          |
| 34  | 51287.18303                | 194.98         | 0.019  | H-3->L+2 (11%), H-3->L+3 (60%), H-3->L+5 (14%)                                                                         |
| 35  | 51398.48754                | 194.56         | 0      | H-2->L+3 (21%), H-1->L+11 (10%), HOMO->L+12 (37%), HOMO-                                                               |
| 36  | 51450.10703                | 194.36         | 0.0232 | H-4->L+2 (72%), H-3->L+3 (12%) H-3->L+2 (6%),                                                                          |
| 37  | 51724.33553                | 193.33         | 0.0114 | HOMO->L+13 (82%) H-6->LUMO (5%), H-3->L+2 (3%)                                                                         |
| 38  | 51862.25634                | 192.82         | 0.0016 | H-4->L+2 (12%), H-3->L+2 (74%) H-3->L+3 (3%),                                                                          |
| 39  | 52053.40974                | 192.11         | 0.1789 | H-6->LUMO (48%), H-2->L+4 (24%) H-3->L+2 (5%),                                                                         |
| 40  | 52154.22904                | 191.74         | 0.0008 | HOMO->L+12 (34%), HOMO->L+14 (60%)                                                                                     |
| 41  | 52848.67241                | 189.22         | 0.0005 | H-1->L+12 (69%), H-1->L+14 (19%) H-1->L+15 (3%)                                                                        |
| 42  | 53043.05202                | 188.53         | 0.0698 | H-2->L+4 (18%), H-1->L+13 (63%) H-5->LUMO (4%),                                                                        |
| 43  | 53109.99604                | 188.29         | 0.002  | H-2->L+6 (11%), HOMO->L+15 (78%) H-2->L+5 (2%)                                                                         |
| 44  | 53407.61463                | 187.24         | 0.0213 | H-5->L+1 (17%), H-2->L+4 (19%), H-1->L+13 (30%)                                                                        |
| 45  | 53566.50585                | 186.68         | 0.0002 | H-2->L+6 (48%), H-1->L+14 (28%) H-1->L+12 (7%)                                                                         |
| 46  | 53697.97422                | 186.23         | 0.0009 | H-2->L+5 (11%), H-2->L+6 (28%), H-1->L+12 (13%), H-1-                                                                  |
| 47  | 53806.05251                | 185.85         | 0      | H-2->L+5 (78%) H-2->L+6 (4%), H-1->L+12 (2%), H-1-                                                                     |
| 48  | 54156.09714                | 184.65         | 0.0238 | H-3->L+3 (13%), H-3->L+5 (19%), H-3->L+6 (51%), H-3->                                                                  |
| 49  | 54168.19545                | 184.61         | 0.0002 | H-4->L+1 (91%) H-4->LUMO (3%), H-4->L+4 (3%),                                                                          |
| 50  | 54711.00658                | 182.78         | 0.024  | HOMO->L+16 (88%) H-5->L+1 (3%)                                                                                         |

**Table SI.8.** Theoretical data of the 50 electronic transitions calculated for the neutral species of 8-bromoharmine (**6N**).

| No. | Energy (cm <sup>-1</sup> ) | λ (nm) | Osc.   | Symmetry (% contribs)                                                                                     |
|-----|----------------------------|--------|--------|-----------------------------------------------------------------------------------------------------------|
| 1   | 31856.48028                | 313.91 | 0.0788 | <b>HOMO-&gt;LUMO (85%)</b> , H-1->LUMO (9%), H-1->L+2 (4%)                                                |
| 2   | 34356.79901                | 291.06 | 0.28   | <b>H-1-&gt;LUMO (76%)</b> , HOMO->L+2 (10%), HOMO->LUMO (9%)                                              |
| 3   | 36562.72538                | 273.50 | 0.0007 | HOMO->L+1 (89%) H-2->L+1 (2%), H-1->L+1 (5%)                                                              |
| 4   | 38875.11692                | 257.23 | 0.0026 | H-3->LUMO (94%) H-3->L+2 (2%)                                                                             |
| 5   | 39136.44056                | 255.52 | 0.0002 | H-1->L+1 (91%) HOMO->L+1 (5%)                                                                             |
| 6   | 39858.30677                | 250.89 | 0.5443 | H-2->LUMO (23%), H-1->LUMO (11%), <b>HOMO-&gt;L+2 (62%)</b>                                               |
| 7   | 40749.54942                | 245.40 | 0.2533 | <b>H-2-&gt;LUMO (40%)</b> , H-1->L+2 (16%), H-1->L+5 (13%), HOMO->L+2 (18%), HOMO->L+5 (6%)               |
| 8   | 40978.61087                | 244.03 | 0.0071 | HOMO->L+3 (90%)                                                                                           |
| 9   | 41228.64275                | 242.55 | 0.1068 | H-2->LUMO (17%), H-1->L+2 (64%) H-1->L+5 (3%), HOMO->LUMO (3%),                                           |
| 10  | 42841.75161                | 233.42 | 0.0047 | H-1->L+3 (88%) HOMO->L+4 (5%)                                                                             |
| 11  | 43890.27236                | 227.84 | 0.0001 | HOMO->L+4 (79%), HOMO->L+6 (10%) H-1->L+3 (4%), HOMO->L+3 (3%)                                            |
| 12  | 44420.98518                | 225.12 | 0.0002 | HOMO->L+6 (82%) HOMO->L+4 (9%)                                                                            |
| 13  | 44431.47038                | 225.07 | 0.06   | HOMO->L+5 (74%) H-2->L+2 (4%), H-1->L+2 (6%), H-1->L+5 (6%), HOM                                          |
| 14  | 45349.32933                | 220.51 | 0.4532 | H-2->LUMO (14%), <b>H-1-&gt;L+5 (62%)</b> , H-1->L+2 (3%), HOMO->L+2 (3%), HOMO->L+5 (7%), HOMO->L+9 (5%) |
| 15  | 45479.99114                | 219.88 | 0.0003 | H-3->L+2 (75%), H-3->L+5 (21%) H-1->L+4 (3%)                                                              |
| 16  | 45564.67936                | 219.47 | 0.0025 | H-1->L+4 (92%) H-3->L+2 (2%)                                                                              |
| 17  | 46393.81731                | 215.55 | 0.0004 | H-1->L+6 (89%) H-1->L+8 (3%), HOMO->L+8 (3%)                                                              |
| 18  | 46545.44954                | 214.84 | 0.0012 | H-2->L+1 (88%) H-4->L+1 (2%), HOMO->L+1 (3%)                                                              |
| 19  | 47283.44685                | 211.49 | 0      | HOMO->L+7 (81%), HOMO->L+8 (10%) HOMO->L+3 (3%)                                                           |
| 20  | 47361.68263                | 211.14 | 0.1283 | <b>H-4-&gt;LUMO (69%)</b> , HOMO->L+9 (17%), H-1->L+5 (2%), H-1->L+9 (6%)                                 |
| 21  | 47800.44823                | 209.20 | 0.0977 | H-4->LUMO (11%), H-2->L+2 (32%), HOMO->L+9 (50%)                                                          |
| 22  | 48024.67037                | 208.23 | 0.0007 | HOMO->L+7 (11%), HOMO->L+8 (80%) H-1->L+6 (3%)                                                            |
| 23  | 48824.77236                | 204.81 | 0.0017 | HOMO->L+10 (93%) HOMO->L+12 (2%)                                                                          |
| 24  | 48977.21115                | 204.18 | 0.0004 | H-1->L+7 (83%) H-1->L+3 (3%), H-1->L+8 (7%), H-1->L+11 (2%)                                               |
| 25  | 49103.03364                | 203.65 | 0      | H-5->LUMO (97%)                                                                                           |
| 26  | 49676.49384                | 201.30 | 0.0001 | H-1->L+7 (10%), H-1->L+8 (82%) H-1->L+6 (2%)                                                              |
| 27  | 49749.08374                | 201.01 | 0.0235 | H-2->L+2 (23%), H-1->L+9 (55%) H-1->L+5 (5%), HOMO->L+9 (5%),                                             |
| 28  | 49886.19799                | 200.46 | 0.0101 | HOMO->L+11 (68%), HOMO->L+14 (21%) H-2->L+3 (4%)                                                          |
| 29  | 50401.58627                | 198.41 | 0.0203 | H-3->L+1 (87%) H-3->L+3 (3%), H-1->L+10 (3%)                                                              |
| 30  | 50499.17935                | 198.02 | 0.0009 | H-2->L+3 (69%), HOMO->L+11 (12%) H-2->L+7 (3%), HOMO->L+14 (6%)                                           |
| 31  | 50530.63498                | 197.90 | 0.014  | H-1->L+10 (74%), HOMO->L+12 (15%) H-3->L+1 (5%)                                                           |
| 32  | 51209.75381                | 195.28 | 0.0058 | H-1->L+10 (17%), HOMO->L+12 (76%) HOMO->L+10 (2%)                                                         |
| 33  | 51619.48346                | 193.73 | 0.001  | H-3->L+2 (17%), H-3->L+5 (67%) H-3->LUMO (3%), HOMO->L+14 (6%)                                            |
| 34  | 51694.49302                | 193.44 | 0      | H-2->L+3 (12%), HOMO->L+14 (51%) H-3->L+5 (8%), H-1->L+11 (8%), H                                         |
| 35  | 51717.8831                 | 193.36 | 0.0256 | H-3->L+3 (67%), H-3->L+4 (16%) H-5->L+1 (2%), H-3->L+1 (5%), H                                            |
| 36  | 51888.87264                | 192.72 | 0.0012 | H-1->L+11 (53%), HOMO->L+13 (31%) H-1->L+14 (6%), HOMO->L+14 (                                            |
| 37  | 52094.54401                | 191.96 | 0.0011 | H-1->L+11 (21%), HOMO->L+13 (60%) HOMO->L+11 (3%), HOMO->L+14                                             |
| 38  | 52117.12754                | 191.88 | 0      | H-5->L+1 (81%) H-3->L+3 (2%), H-2->L+5 (3%), H-1->L+9 (4%)                                                |
| 39  | 52603.47986                | 190.10 | 0.11   | H-2->L+5 (54%), H-1->L+12 (15%) H-4->L+2 (9%), H-2->L+2 (6%), H-                                          |
| 40  | 52772.85629                | 189.49 | 0.0812 | H-2->L+5 (25%), H-1->L+12 (52%) H-5->L+1 (5%), H-2->L+2 (2%),                                             |
| 41  | 52992.23909                | 188.71 | 0.0149 | H-2->L+2 (23%), H-1->L+9 (15%), H-1->L+12 (27%) H-5->L+1 (6%),                                            |
| 42  | 53248.7234                 | 187.80 | 0.0006 | H-2->L+4 (16%), H-1->L+14 (69%) H-2->L+6 (3%), H-1->L+11 (4%)                                             |
| 43  | 53360.02791                | 187.41 | 0.0055 | H-4->L+1 (18%), H-2->L+4 (42%), H-1->L+14 (13%) H-2->L+3 (3%),                                            |
| 44  | 53734.26917                | 186.10 | 0      | H-4->L+1 (16%), H-2->L+4 (22%), H-1->L+13 (49%) H-1->L+14 (5%), H                                         |
| 45  | 53822.1836                 | 185.80 | 0.0034 | H-4->L+1 (34%), H-2->L+4 (12%), H-2->L+6 (16%), H-1->L+13 (31%)                                           |
| 46  | 53893.16039                | 185.55 | 0.0075 | H-2->L+6 (35%), HOMO->L+15 (47%) H-4->L+1 (3%), H-1->L+13 (5%)                                            |
| 47  | 54034.30742                | 185.07 | 0.002  | H-4->L+1 (20%), H-2->L+6 (31%), HOMO->L+15 (40%)                                                          |
| 48  | 54378.70616                | 183.90 | 0.0296 | H-6->LUMO (53%), H-4->L+2 (19%) H-3->L+6 (9%), H-2->L+5 (4%),                                             |
| 49  | 54646.48223                | 182.99 | 0.0175 | H-3->L+3 (11%), H-3->L+6 (67%) H-6->LUMO (4%), H-3->L+4 (3%), H                                           |
| 50  | 54735.20322                | 182.70 | 0.0923 | H-6->LUMO (29%), H-4->L+2 (47%), HOMO->L+17 (13%) H-4->L+5 (2%)                                           |

**Table SI.9.** Theoretical data of the 50 electronic transitions calculated for the neutral species of 6,8-dibromoharmine (7N).

| No. | Energy (cm <sup>-1</sup> ) | λ (nm)      | Osc.   | Symmetry (% contribs)                                                                                                                                         |
|-----|----------------------------|-------------|--------|---------------------------------------------------------------------------------------------------------------------------------------------------------------|
| 1   | 30535.34413                | 327.48935   | 0.0793 | <b>HOMO-&gt;LUMO (95%), H-1-&gt;L+2 (3%)</b>                                                                                                                  |
| 2   | 34397.12673                | 290.721957  | 0.0001 | HOMO->L+1 (95%) H-2->L+1 (3%)                                                                                                                                 |
| 3   | 35298.85459                | 283.2953114 | 0.1235 | <b>H-1-&gt;LUMO (72%), HOMO-&gt;L+2 (22%), H-2-&gt;LUMO (4%)</b>                                                                                              |
| 4   | 37648.34764                | 265.6159069 | 0.0022 | H-3->LUMO (94%)                                                                                                                                               |
| 5   | 38179.86701                | 261.9181465 | 0.0005 | H-1->L+1 (95%)                                                                                                                                                |
| 6   | 39392.92487                | 253.8526914 | 0.2262 | <b>H-2-&gt;LUMO (63%), HOMO-&gt;L+2 (28%), H-1-&gt;L+4 (5%)</b>                                                                                               |
| 7   | 39726.8384                 | 251.7189991 | 0.8291 | <b>H-2-&gt;LUMO (25%), H-1-&gt;LUMO (23%), HOMO-&gt;L+2 (47%)</b>                                                                                             |
| 8   | 41298.81298                | 242.13771   | 0.0054 | HOMO->L+3 (87%) HOMO->L+5 (4%)                                                                                                                                |
| 9   | 42243.28822                | 236.7239962 | 0.0044 | HOMO->L+5 (68%) H-1->L+2 (3%), HOMO->L+3 (6%), HOMO->L+4 (9%), HOMO->L+6 (3%), HOMO->L+7 (2%)                                                                 |
| 10  | 42347.33374                | 236.1423758 | 0.0451 | H-1->L+2 (48%), HOMO->L+4 (30%), HOMO->L+5 (11%)                                                                                                              |
| 11  | 43557.16538                | 229.5833513 | 0.0002 | H-2->L+1 (90%) HOMO->L+1 (3%)                                                                                                                                 |
| 12  | 44270.1595                 | 225.8857911 | 0.2462 | <b>HOMO-&gt;L+4 (20%), HOMO-&gt;L+6 (35%), HOMO-&gt;L+8 (10%), H-4-&gt;LUMO (4%), H-2-&gt;L+2 (3%), H-1-&gt;L+2 (9%), H-1-&gt;L+4 (4%), HOMO-&gt;L+5 (4%)</b> |
| 13  | 44518.57826                | 224.6253225 | 0.003  | H-5->LUMO (82%) H-6->LUMO (8%), H-4->LUMO (3%), HOMO->L+6 (3%)                                                                                                |
| 14  | 44736.34796                | 223.5318808 | 0.0295 | H-1->L+2 (10%), HOMO->L+4 (15%), HOMO->L+6 (37%), HOMO->L+7 (21%) H-4->LUMO (5%), H-1->L+3 (3%)                                                               |
| 15  | 45078.32704                | 221.8360941 | 0.0256 | HOMO->L+7 (59%) H-4->LUMO (4%), H-3->L+2 (6%), H-3->L+4 (3%), H-1->L+2 (5%), HOMO->L+4 (4%), HOMO->                                                           |
| 16  | 45139.62517                | 221.534848  | 0.0013 | H-3->L+2 (61%), H-3->L+4 (25%) HOMO->L+7 (7%)                                                                                                                 |
| 17  | 45597.74809                | 219.309076  | 0.174  | <b>H-4-&gt;LUMO (47%), HOMO-&gt;L+8 (30%), H-1-&gt;L+3 (9%)</b>                                                                                               |
| 18  | 45771.96385                | 218.4743489 | 0.023  | H-1->L+3 (58%), H-1->L+5 (18%) H-4->LUMO (3%), H-1->L+4 (4%), H-1->L+7 (2%), HOMO->L+8 (6%)                                                                   |
| 19  | 45948.59927                | 217.6344907 | 0.1443 | <b>H-4-&gt;LUMO (26%), HOMO-&gt;L+8 (36%), H-2-&gt;L+2 (8%), H-1-&gt;L+2 (8%), HOMO-&gt;L+4 (9%)</b>                                                          |
| 20  | 46555.93475                | 214.7953865 | 0.0009 | H-6->LUMO (87%) H-5->LUMO (9%)                                                                                                                                |
| 21  | 46694.66211                | 214.1572408 | 0.0026 | H-1->L+3 (22%), H-1->L+5 (67%) H-1->L+4 (2%)                                                                                                                  |
| 22  | 47462.50193                | 210.6926435 | 0.007  | H-2->L+2 (48%), H-1->L+4 (13%), H-1->L+6 (10%) H-4->LUMO (2%), H-3->L+1 (3%), H-1->L+8 (6%), HOMO->L                                                          |
| 23  | 47489.92478                | 210.57098   | 0.0237 | H-3->L+1 (90%) H-2->L+2 (5%)                                                                                                                                  |
| 24  | 48073.06363                | 208.0166988 | 0.062  | H-1->L+4 (57%) H-3->L+1 (3%), H-2->LUMO (2%), H-2->L+2 (7%), H-1->L+5 (4%), H-1->L+6 (5%), HOMO->L+8                                                          |
| 25  | 48102.09959                | 207.8911333 | 0.0007 | H-7->LUMO (95%)                                                                                                                                               |
| 26  | 48722.33995                | 205.244658  | 0.0006 | H-5->L+1 (90%) HOMO->L+9 (3%)                                                                                                                                 |
| 27  | 48828.80513                | 204.7971474 | 0.0102 | HOMO->L+9 (77%) H-5->L+1 (2%), H-4->L+1 (3%), H-1->L+4 (3%), H-1->L+6 (4%)                                                                                    |
| 28  | 48919.94578                | 204.4155986 | 0.0007 | H-4->L+1 (59%) H-8->L+1 (2%), H-2->L+3 (7%), H-2->L+5 (7%), HOMO->L+5 (3%), HOMO->L+9 (3%), HOMO->L                                                           |
| 29  | 49182.88253                | 203.3227718 | 0.007  | H-1->L+6 (13%), HOMO->L+10 (63%) H-4->L+1 (3%), H-1->L+7 (4%)                                                                                                 |
| 30  | 49461.1438                 | 202.1789071 | 0.0123 | H-8->LUMO (17%), H-1->L+6 (22%), HOMO->L+10 (12%), HOMO->L+11 (29%) H-2->L+2 (4%)                                                                             |
| 31  | 49669.23485                | 201.3318713 | 0.0016 | H-1->L+6 (21%), HOMO->L+11 (45%) H-2->L+2 (3%), H-1->L+7 (7%), HOMO->L+10 (7%), HOMO->L+12 (2%)                                                               |
| 32  | 49870.87345                | 200.5178435 | 0.0047 | H-8->LUMO (13%), H-1->L+7 (55%), HOMO->L+11 (13%) H-6->L+1 (3%), HOMO->L+10 (3%)                                                                              |
| 33  | 50100.74147                | 199.5978444 | 0.0023 | H-6->L+1 (40%), H-1->L+7 (18%), H-1->L+8 (17%) H-8->LUMO (7%), H-1->L+6 (6%)                                                                                  |
| 34  | 50242.69505                | 199.0339091 | 0.0312 | H-8->LUMO (17%), H-6->L+1 (39%), H-1->L+8 (23%) H-1->L+6 (5%), H-1->L+7 (2%)                                                                                  |
| 35  | 50357.22577                | 198.5812333 | 0.0022 | H-3->L+2 (26%), H-3->L+4 (54%) H-3->LUMO (2%), H-3->L+5 (5%), H-3->L+6 (5%), H-3->L+8 (2%)                                                                    |
| 36  | 50599.1921                 | 197.631614  | 0.0089 | H-2->L+3 (72%) H-4->L+1 (4%), H-2->L+5 (3%), HOMO->L+12 (5%), HOMO->L+14 (3%)                                                                                 |
| 37  | 50814.54214                | 196.7940589 | 0.0062 | HOMO->L+13 (79%) HOMO->L+14 (8%)                                                                                                                              |
| 38  | 51000.85621                | 196.0751396 | 0.0032 | H-7->L+1 (77%) H-8->LUMO (5%), H-7->L+5 (3%), H-2->L+4 (3%), H-1->L+8 (3%)                                                                                    |
| 39  | 51232.33733                | 195.1892207 | 0.024  | HOMO->L+12 (69%) H-7->L+1 (2%), H-2->L+3 (4%), H-2->L+4 (9%), HOMO->L+11 (4%)                                                                                 |
| 40  | 51479.94954                | 194.2503847 | 0.1305 | H-8->LUMO (15%), H-2->L+4 (31%), H-1->L+8 (15%), HOMO->L+12 (12%) H-7->L+1 (6%), H-5->L+2 (2%), H-2                                                           |
| 41  | 51849.35147                | 192.8664432 | 0.0062 | H-4->L+1 (15%), H-2->L+5 (63%) H-2->L+4 (7%), HOMO->L+13 (3%)                                                                                                 |
| 42  | 51930.00691                | 192.5668914 | 0.0365 | H-3->L+3 (67%) H-3->L+5 (8%), H-3->L+6 (9%), H-3->L+8 (5%), H-2->L+4 (6%)                                                                                     |
| 43  | 52263.92044                | 191.3365839 | 0.0424 | H-5->L+2 (76%) H-5->L+4 (4%), H-2->L+4 (8%)                                                                                                                   |
| 44  | 52330.05791                | 191.0947627 | 0.0449 | H-4->L+2 (21%), H-2->L+4 (14%), H-1->L+8 (12%), H-1->L+9 (12%) H-9->LUMO (4%), H-8->LUMO (5%), H-5-                                                           |
| 45  | 52762.37108                | 189.5290108 | 0.025  | HOMO->L+14 (64%) H-4->L+2 (7%), H-2->L+3 (3%), H-2->L+5 (2%), H-2->L+8 (3%), H-1->L+9 (2%), HOMO->L+                                                          |
| 46  | 52872.06248                | 189.1358031 | 0.1026 | H-4->L+2 (34%), H-2->L+6 (17%), H-1->L+9 (10%), HOMO->L+14 (13%) H-5->L+2 (2%), H-2->L+4 (5%), H-2-                                                           |
| 47  | 53401.96874                | 187.2590138 | 0.0922 | H-4->L+2 (10%), H-2->L+6 (41%), H-1->L+9 (23%) H-6->L+2 (2%), H-4->L+4 (4%), H-2->L+4 (3%), H-2->L+                                                           |
| 48  | 53434.23092                | 187.1459517 | 0.0027 | H-6->L+2 (70%) H-6->L+4 (4%), H-5->L+2 (3%), H-3->L+6 (9%), H-3->L+8 (4%)                                                                                     |
| 49  | 53687.48901                | 186.2631347 | 0.0184 | H-2->L+7 (21%), HOMO->L+15 (28%) H-4->L+2 (4%), H-2->L+5 (3%), H-2->L+6 (5%), H-1->L+9 (6%), H-1->L+                                                          |
| 50  | 53748.78715                | 186.0507098 | 0.0012 | H-6->L+2 (15%), H-3->L+6 (38%), H-3->L+8 (15%) H-3->L+2 (3%), H-3->L+3 (2%), H-3->L+4 (6%), H-3->L+                                                           |



**Table SI.10.** Theoretical data of the 50 electronic transitions calculated for the neutral species of 6-nitroharimine (**8N**).

| No. | Energy (cm <sup>-1</sup> ) | $\lambda$ (nm) | Osc.   | Symmetry (% contribs)                                                                                                                                                          |
|-----|----------------------------|----------------|--------|--------------------------------------------------------------------------------------------------------------------------------------------------------------------------------|
| 1   | 24762.02752                | 403.84         | 0.0289 | H-1->LUMO (17%), <b>HOMO-&gt;LUMO (81%)</b>                                                                                                                                    |
| 2   | 26277.5433                 | 380.55         | 0.1916 | <b>H-1-&gt;LUMO (80%)</b> , HOMO->LUMO (16%)                                                                                                                                   |
| 3   | 31800.02147                | 314.47         | 0.0145 | H-5->LUMO (45%), H-3->LUMO (41%) HOMO->L+1 (7%)                                                                                                                                |
| 4   | 33377.64194                | 299.60         | 0.1097 | <b>HOMO-&gt;L+1 (80%)</b> , H-5->LUMO (5%), H-3->LUMO (2%), H-1->L+1 (5%), H-1->L+2 (3%)                                                                                       |
| 5   | 34648.77172                | 288.61         | 0.0005 | H-2->LUMO (96%) H-2->L+1 (2%)                                                                                                                                                  |
| 6   | 35785.20691                | 279.45         | 0.0183 | H-6->LUMO (30%), H-5->LUMO (26%), H-3->LUMO (24%) H-1->L+1 (9%), HOMO->L+1 (2%)                                                                                                |
| 7   | 36023.14046                | 277.60         | 0.3951 | <b>H-1-&gt;L+1 (74%)</b> , H-6->LUMO (7%), H-5->LUMO (3%), HOMO->L+1 (3%), HOMO->L+2 (6%)                                                                                      |
| 8   | 37200.70993                | 268.81         | 0.1135 | <b>H-6-&gt;LUMO (44%)</b> , H-5->LUMO (15%), <b>H-3-&gt;LUMO (29%)</b> , H-8->LUMO (4%), H-4->LUMO (3%)                                                                        |
| 9   | 38966.25757                | 256.63         | 0.0023 | H-2->L+1 (92%) H-2->LUMO (2%), H-2->L+2 (3%)                                                                                                                                   |
| 10  | 40329.33456                | 247.96         | 0.0136 | H-4->LUMO (85%) H-6->LUMO (4%), HOMO->L+2 (7%)                                                                                                                                 |
| 11  | 41734.35237                | 239.61         | 0.474  | <b>HOMO-&gt;L+2 (73%)</b> , H-4->LUMO (7%), H-3->L+1 (2%), H-1->L+1 (6%), H-1->L+4 (2%), HOMO->L+4 (4%)                                                                        |
| 12  | 42388.46802                | 235.91         | 0.0533 | H-3->L+1 (27%), H-1->L+2 (42%), H-1->L+4 (13%) HOMO->L+2 (3%), HOMO->L+4 (9%)                                                                                                  |
| 13  | 42622.3688                 | 234.62         | 0.0007 | HOMO->L+3 (95%)                                                                                                                                                                |
| 14  | 43254.70747                | 231.19         | 0.1044 | H-3->L+1 (43%), H-1->L+2 (34%), H-1->L+4 (10%) H-8->LUMO (2%), HOMO->L+4 (4%)                                                                                                  |
| 15  | 44696.82679                | 223.73         | 0.006  | H-1->L+3 (91%) HOMO->L+5 (4%)                                                                                                                                                  |
| 16  | 45525.15819                | 219.66         | 0.2013 | H-1->L+2 (10%), <b>HOMO-&gt;L+4 (67%)</b> , H-8->LUMO (3%), H-4->L+1 (5%), H-1->L+4 (3%), HOMO->L+2 (3%), HOMO->L+8 (3%)                                                       |
| 17  | 45851.81273                | 218.09         | 0.0037 | HOMO->L+5 (23%), HOMO->L+6 (69%) H-1->L+3 (2%)                                                                                                                                 |
| 18  | 45987.31388                | 217.45         | 0.0006 | H-2->L+2 (63%), H-2->L+4 (32%)                                                                                                                                                 |
| 19  | 46195.40492                | 216.47         | 0.004  | HOMO->L+5 (66%), HOMO->L+6 (26%)                                                                                                                                               |
| 20  | 46560.77408                | 214.77         | 0.1679 | H-3->L+1 (18%), <b>H-1-&gt;L+4 (59%)</b> , H-8->LUMO (2%), H-1->L+2 (3%), HOMO->L+4 (6%)                                                                                       |
| 21  | 47735.92388                | 209.49         | 0.0227 | H-8->LUMO (61%), HOMO->L+8 (16%) H-7->LUMO (3%), H-6->LUMO (3%), H-3->L+1 (3%), H-1->L+5 (5%), HOMO->L+7 (2%)                                                                  |
| 22  | 47793.9958                 | 209.23         | 0.0013 | H-1->L+5 (85%) H-8->LUMO (3%), H-1->L+6 (4%), HOMO->L+7 (2%)                                                                                                                   |
| 23  | 47937.56249                | 208.60         | 0.0007 | H-1->L+6 (87%) H-1->L+3 (2%), H-1->L+5 (3%)                                                                                                                                    |
| 24  | 49013.5061                 | 204.03         | 0.1382 | H-8->LUMO (10%), H-4->L+1 (23%), HOMO->L+8 (49%) H-1->L+8 (5%), HOMO->L+10 (2%)                                                                                                |
| 25  | 49109.48607                | 203.63         | 0.0306 | HOMO->L+7 (80%) H-7->LUMO (3%), H-4->L+1 (2%), H-1->L+5 (2%)                                                                                                                   |
| 26  | 49194.98084                | 203.27         | 0.0377 | H-9->LUMO (18%), H-7->LUMO (48%) H-6->LUMO (5%), H-5->L+1 (9%), H-4->L+1 (3%), H-1->L+8 (3%)                                                                                   |
| 27  | 49807.96221                | 200.77         | 0.09   | H-4->L+1 (27%), HOMO->L+8 (12%), HOMO->L+9 (22%) H-9->LUMO (3%), H-7->LUMO (3%), H-3->L+2 (2%), H-1->L+4 (2%), H-1->L+8 (6%), HOMO->L+7 (4%), HOMO->L+10 (3%), HOMO->L+11 (4%) |
| 28  | 50035.41056                | 199.86         | 0.0149 | HOMO->L+9 (60%) H-9->LUMO (3%), H-5->L+1 (3%), H-4->L+1 (5%), H-3->L+2 (3%), H-1->L+8 (4%), HOMO->L+8 (3%)                                                                     |
| 29  | 50516.92355                | 197.95         | 0.0089 | H-9->LUMO (11%), H-5->L+1 (70%) H-1->L+8 (3%), HOMO->L+10 (5%)                                                                                                                 |
| 30  | 50566.12337                | 197.76         | 0.0046 | H-1->L+7 (31%), H-1->L+8 (30%), H-1->L+11 (10%), H-4->L+1 (2%), H-3->L+2 (3%), H-1->L+9 (8%), HOMO->L+9 (3%), HOMO->L+10 (2%)                                                  |
| 31  | 50778.24719                | 196.93         | 0.0211 | HOMO->L+10 (77%) H-5->L+1 (2%), H-4->L+1 (4%), H-3->L+4 (2%), H-1->L+7 (3%), HOMO->L+12 (3%)                                                                                   |
| 32  | 50950.04328                | 196.27         | 0.001  | H-3->L+2 (17%), H-1->L+7 (31%), H-1->L+8 (15%), HOMO->L+11 (19%) H-4->L+1 (5%), H-2->L+3 (3%)                                                                                  |
| 33  | 51158.13432                | 195.47         | 0.0037 | H-1->L+7 (21%), HOMO->L+11 (61%) H-1->L+8 (2%), HOMO->L+9 (4%)                                                                                                                 |
| 34  | 51447.68736                | 194.37         | 0.0001 | H-2->L+2 (27%), H-2->L+4 (59%) H-9->LUMO (2%), H-2->L+1 (3%)                                                                                                                   |
| 35  | 51607.38514                | 193.77         | 0.0114 | H-9->LUMO (35%), H-7->LUMO (13%), H-1->L+9 (24%) H-5->L+1 (3%), H-3->L+2 (2%), H-2->L+4 (5%), H-1->L+11 (3%)                                                                   |
| 36  | 51621.90312                | 193.72         | 0.0181 | H-9->LUMO (19%), H-7->LUMO (10%), H-1->L+9 (33%) H-5->L+1 (3%), H-3->L+2 (9%), H-2->L+3 (3%), H-1->L+7 (5%), H-1->L+8 (2%), H-1->L+11 (6%)                                     |
| 37  | 51977.59362                | 192.39         | 0.0249 | H-2->L+3 (68%), H-2->L+5 (14%) H-4->L+1 (3%), H-3->L+2 (5%)                                                                                                                    |
| 38  | 52414.74612                | 190.79         | 0.0225 | H-6->L+1 (75%), H-3->L+2 (10%) H-1->L+9 (3%), H-1->L+11 (2%)                                                                                                                   |
| 39  | 52551.86038                | 190.29         | 0.0017 | H-1->L+10 (85%) H-1->L+8 (5%), HOMO->L+12 (2%)                                                                                                                                 |
| 40  | 52675.2632                 | 189.84         | 0.0069 | H-1->L+9 (17%), H-1->L+11 (55%) H-6->L+1 (7%), H-3->L+3 (3%), HOMO->L+13 (5%)                                                                                                  |
| 41  | 52918.03609                | 188.97         | 0.0001 | H-3->L+3 (21%), HOMO->L+13 (21%), HOMO->L+14 (36%) H-1->L+11 (8%), HOMO->L+11 (2%), HOMO->L+15 (3%)                                                                            |
| 42  | 53566.50585                | 186.68         | 0.0101 | H-3->L+3 (50%), HOMO->L+14 (33%) HOMO->L+12 (9%)                                                                                                                               |
| 43  | 53621.35155                | 186.49         | 0.0165 | HOMO->L+12 (73%) H-3->L+2 (2%), H-3->L+3 (5%), HOMO->L+10 (2%), HOMO->L+13 (4%), HOMO->L+14 (4%)                                                                               |
| 44  | 54151.25781                | 184.67         | 0.0005 | H-3->L+3 (14%), HOMO->L+13 (64%), HOMO->L+14 (13%) HOMO->L+12 (3%)                                                                                                             |
| 45  | 54339.18499                | 184.03         | 0.1442 | H-3->L+2 (15%), H-3->L+4 (41%) H-7->L+1 (5%), H-6->L+1 (4%), H-1->L+8 (8%), H-1->L+11 (4%), HOMO->L+12 (5%)                                                                    |
| 46  | 54658.58054                | 182.95         | 0.0018 | H-2->L+5 (19%), H-2->L+6 (49%), H-2->L+7 (11%) H-3->L+4 (5%), H-2->L+3 (9%)                                                                                                    |
| 47  | 54834.40941                | 182.37         | 0.0286 | H-7->L+1 (75%) H-12->LUMO (8%), H-10->LUMO (3%)                                                                                                                                |
| 48  | 54969.91055                | 181.92         | 0.0453 | H-3->L+4 (26%), HOMO->L+15 (24%) H-4->L+1 (3%), H-4->L+2 (6%), H-3->L+2 (7%), H-2->L+3 (2%), H-2->L+5 (4%)                                                                     |
| 49  | 55039.27424                | 181.69         | 0.0131 | H-3->L+4 (11%), HOMO->L+15 (55%) H-4->L+2 (3%), H-3->L+2 (4%), H-1->L+13 (8%), HOMO->L+14 (3%)                                                                                 |
| 50  | 55161.06395                | 181.29         | 0.0009 | H-1->L+13 (32%), H-1->L+14 (48%) H-1->L+15 (4%), HOMO->L+15 (6%)                                                                                                               |

**Table SI.11.** Theoretical data of the 50 electronic transitions calculated for the neutral species of 8-nitroharimine (**9N**).

| No. | Energy (cm <sup>-1</sup> ) | λ (nm) | Osc.   | Symmetry (% contribs)                                                                                                                    |
|-----|----------------------------|--------|--------|------------------------------------------------------------------------------------------------------------------------------------------|
| 1   | 23675.59871                | 422.38 | 0.1182 | <b>HOMO-&gt;LUMO (92%)</b> , H-1->LUMO (7%)                                                                                              |
| 2   | 25675.04714                | 389.48 | 0.0826 | <b>H-1-&gt;LUMO (91%)</b> , HOMO->LUMO (7%)                                                                                              |
| 3   | 31292.69874                | 319.56 | 0.0082 | H-5->LUMO (50%), H-4->LUMO (33%), H-3->LUMO (10%)                                                                                        |
| 4   | 32821.92593                | 304.67 | 0.0004 | H-2->LUMO (98%)                                                                                                                          |
| 5   | 34527.78855                | 289.62 | 0.0058 | H-3->LUMO (26%), HOMO->L+1 (63%) H-5->LUMO (2%), H-1->L+2 (2%)                                                                           |
| 6   | 34685.87322                | 288.30 | 0.1395 | <b>H-3-&gt;LUMO (54%)</b> , HOMO->L+1 (28%), H-6->LUMO (3%), H-5->LUMO (9%), H-1->L+2 (2%)                                               |
| 7   | 36100.56969                | 277.00 | 0.0079 | H-6->LUMO (71%) H-7->LUMO (6%), H-5->LUMO (5%), H-4->LUMO (7%), H-3->LUMO (6%)                                                           |
| 8   | 36619.99074                | 273.07 | 0.37   | <b>H-1-&gt;L+1 (86%)</b> , HOMO->L+2 (9%)                                                                                                |
| 9   | 39359.85614                | 254.07 | 0.0453 | H-6->LUMO (10%), H-5->LUMO (27%), H-4->LUMO (50%) H-2->L+1 (8%)                                                                          |
| 10  | 39378.40689                | 253.95 | 0.0061 | H-2->L+1 (87%) H-5->LUMO (3%), H-4->LUMO (4%)                                                                                            |
| 11  | 42406.21221                | 235.81 | 0.6834 | <b>HOMO-&gt;L+2 (84%)</b> , H-1->L+1 (7%), H-1->L+4 (2%)                                                                                 |
| 12  | 43175.66514                | 231.61 | 0.0618 | H-1->L+2 (77%), HOMO->L+4 (13%) H-8->LUMO (2%), HOMO->L+1 (3%)                                                                           |
| 13  | 43351.494                  | 230.67 | 0.0101 | HOMO->L+3 (94%) HOMO->L+5 (2%)                                                                                                           |
| 14  | 44182.24507                | 226.34 | 0.1297 | <b>H-3-&gt;L+1 (61%)</b> , H-1->L+4 (23%), HOMO->L+4 (8%)                                                                                |
| 15  | 44918.62926                | 222.62 | 0.0011 | H-1->L+3 (86%) HOMO->L+5 (9%)                                                                                                            |
| 16  | 45855.03895                | 218.08 | 0.0861 | H-8->LUMO (24%), H-2->L+2 (18%), HOMO->L+4 (37%) H-3->L+1 (5%), H-2->L+4 (6%),                                                           |
| 17  | 45919.56331                | 217.77 | 0.032  | H-2->L+2 (54%), H-2->L+4 (20%), HOMO->L+4 (12%) H-8->LUMO (8%)                                                                           |
| 18  | 46338.97161                | 215.80 | 0.0007 | HOMO->L+5 (75%), HOMO->L+6 (11%) H-1->L+3 (8%)                                                                                           |
| 19  | 46720.47185                | 214.04 | 0.0008 | HOMO->L+6 (85%) HOMO->L+5 (9%)                                                                                                           |
| 20  | 47301.9976                 | 211.41 | 0.0186 | H-9->LUMO (10%), H-7->LUMO (15%), H-3->L+1 (17%), H-1->L+4 (18%), HOMO->L+8 (10%)                                                        |
| 21  | 47473.79369                | 210.64 | 0.1169 | H-9->LUMO (15%), H-8->LUMO (35%), H-7->LUMO (13%) H-6->LUMO (4%), H-4->L+1 (3%)                                                          |
| 22  | 47714.14691                | 209.58 | 0.0049 | H-1->L+5 (91%) HOMO->L+7 (3%)                                                                                                            |
| 23  | 47919.01174                | 208.69 | 0.1181 | H-9->LUMO (14%), <b>H-1-&gt;L+4 (44%)</b> , H-8->LUMO (5%), H-7->LUMO (7%), H-6->LUMO (2%), H-3->L+1 (7%), H-1->L+2 (3%), HOMO->L+4 (7%) |
| 24  | 48515.86201                | 206.12 | 0.0008 | H-1->L+6 (87%) HOMO->L+9 (4%)                                                                                                            |
| 25  | 49263.53797                | 202.99 | 0.0547 | H-9->LUMO (24%), H-7->LUMO (34%), HOMO->L+7 (14%) H-5->L+1 (7%), H-4->L+1 (4%)                                                           |
| 26  | 49340.96719                | 202.67 | 0.0138 | H-7->LUMO (10%), HOMO->L+7 (63%) H-9->LUMO (7%), H-1->L+5 (2%), HOMO->L+9 (5%)                                                           |
| 27  | 49766.02138                | 200.94 | 0.0097 | HOMO->L+8 (42%), HOMO->L+9 (10%) H-9->LUMO (3%), H-8->LUMO (7%), H-7->LUMO (3%)                                                          |
| 28  | 50007.98771                | 199.97 | 0.0677 | H-9->LUMO (10%), H-5->L+1 (11%), H-4->L+1 (55%) H-1->L+7 (4%), H-1->L+8 (6%), H                                                          |
| 29  | 50088.64315                | 199.65 | 0.0042 | HOMO->L+8 (24%), HOMO->L+9 (54%) H-1->L+6 (6%), H-1->L+8 (3%), HOMO->L+7 (5%)                                                            |
| 30  | 50617.74286                | 197.56 | 0.013  | H-1->L+7 (63%) H-5->L+1 (6%), H-1->L+6 (2%), H-1->L+8 (3%), H-1->L+9 (2%), H-1->                                                         |
| 31  | 50924.23354                | 196.37 | 0.0817 | H-5->L+1 (25%), H-1->L+8 (20%), H-1->L+9 (20%) H-9->LUMO (2%), H-3->L+2 (2%), H                                                          |
| 32  | 51142.80979                | 195.53 | 0.0603 | H-5->L+1 (27%), H-4->L+1 (10%), H-3->L+2 (24%), H-2->L+3 (10%) H-2->L+5 (3%), H                                                          |
| 33  | 51579.15573                | 193.88 | 0.0002 | H-1->L+8 (39%), H-1->L+9 (42%) H-1->L+7 (7%), HOMO->L+10 (5%)                                                                            |
| 34  | 51638.03421                | 193.66 | 0.0031 | H-1->L+9 (10%), HOMO->L+10 (69%), HOMO->L+12 (10%) H-3->L+2 (4%)                                                                         |
| 35  | 52067.92772                | 192.06 | 0.0304 | H-2->L+3 (66%), H-2->L+5 (10%) H-5->L+1 (4%), H-4->L+1 (3%), H-3->L+2 (5%), H-2                                                          |
| 36  | 52400.22814                | 190.84 | 0.0027 | HOMO->L+11 (77%), HOMO->L+14 (15%)                                                                                                       |
| 37  | 52613.15851                | 190.07 | 0.0004 | H-2->L+2 (25%), H-2->L+4 (70%)                                                                                                           |
| 38  | 52809.95779                | 189.36 | 0.0119 | H-1->L+10 (66%), HOMO->L+12 (15%) H-3->L+2 (7%), H-1->L+8 (2%)                                                                           |
| 39  | 53364.06069                | 187.39 | 0.0028 | H-10->LUMO (61%), H-6->L+1 (10%) H-12->LUMO (2%), H-9->LUMO (3%), H-3->L+3 (4%)                                                          |
| 40  | 53393.09665                | 187.29 | 0.0006 | H-10->LUMO (13%), H-3->L+3 (20%), HOMO->L+14 (42%) H-1->L+11 (2%), HOMO->L+11 (                                                          |
| 41  | 53595.54181                | 186.58 | 0.0089 | H-10->LUMO (16%), H-6->L+1 (65%) H-7->L+1 (4%), HOMO->L+12 (3%)                                                                          |
| 42  | 53877.83586                | 185.61 | 0.0107 | H-1->L+10 (13%), HOMO->L+12 (65%) H-6->L+1 (4%), HOMO->L+10 (7%)                                                                         |
| 43  | 54010.11078                | 185.15 | 0.0029 | H-1->L+11 (42%), HOMO->L+13 (45%) H-3->L+3 (3%)                                                                                          |
| 44  | 54194.00519                | 184.52 | 0.0009 | H-3->L+3 (43%), H-1->L+11 (27%), HOMO->L+13 (14%) H-1->L+9 (2%), HOMO->L+14 (3%)                                                         |
| 45  | 54523.0794                 | 183.41 | 0.0172 | H-11->LUMO (20%), H-3->L+3 (13%), HOMO->L+13 (15%), HOMO->L+14 (12%) H-6->L+1 (                                                          |
| 46  | 54559.37435                | 183.29 | 0.0164 | H-11->LUMO (18%), H-3->L+3 (10%), H-1->L+11 (13%), HOMO->L+13 (19%), HOMO->L+14 (12%)                                                    |
| 47  | 54969.91055                | 181.92 | 0.0064 | H-11->LUMO (31%), H-1->L+12 (44%) H-3->L+2 (3%), H-2->L+6 (3%), H-1->L+10 (2%)                                                           |
| 48  | 55085.24784                | 181.54 | 0.0016 | H-2->L+6 (73%) H-2->L+3 (5%), H-2->L+8 (5%), H-2->L+9 (4%), H-1->L+12 (9%)                                                               |
| 49  | 55185.26059                | 181.21 | 0.0018 | H-1->L+13 (13%), H-1->L+14 (66%) H-1->L+11 (3%), H-1->L+12 (6%)                                                                          |
| 50  | 55351.4108                 | 180.66 | 0.0048 | H-11->LUMO (11%), H-3->L+2 (12%), H-1->L+12 (26%) H-7->L+1 (6%), H-5->L+2 (4%),                                                          |

**Table SI.12.** Theoretical data of the 50 electronic transitions calculated for the neutral species of 6,8-dinitroharminine (**10N**).

| No. | Energy (cm <sup>-1</sup> ) | λ (nm) | Osc.   | Symmetry (% contribs)                                                                                                                                                     |
|-----|----------------------------|--------|--------|---------------------------------------------------------------------------------------------------------------------------------------------------------------------------|
| 1   | 23241.67243                | 430.26 | 0.102  | <b>HOMO-&gt;LUMO (99%)</b>                                                                                                                                                |
| 2   | 25877.4923                 | 386.44 | 0.0613 | H-1->LUMO (16%), <b>HOMO-&gt;L+1 (81%)</b>                                                                                                                                |
| 3   | 27430.91613                | 364.55 | 0.1484 | <b>H-1-&gt;LUMO (79%)</b> , HOMO->L+1 (14%)                                                                                                                               |
| 4   | 29041.60533                | 344.33 | 0.0167 | H-1->L+1 (89%) H-6->L+1 (4%)                                                                                                                                              |
| 5   | 30557.1211                 | 327.26 | 0.0048 | H-5->LUMO (15%), H-2->LUMO (63%) H-7->LUMO (5%), H-4->LUMO (8%), H-3->LUMO (4%)                                                                                           |
| 6   | 30922.49025                | 323.39 | 0.0095 | H-7->LUMO (10%), H-5->LUMO (32%), H-2->LUMO (33%) H-4->LUMO (9%), H-3->LUMO (9%)                                                                                          |
| 7   | 31952.46026                | 312.96 | 0.0018 | H-6->L+1 (36%), H-3->L+1 (44%) H-7->L+1 (2%), H-4->LUMO (3%), H-1->L+1 (4%), HOM                                                                                          |
| 8   | 32679.97235                | 306.00 | 0.0045 | H-5->LUMO (13%), H-4->LUMO (64%) H-10->LUMO (4%), H-4->L+1 (3%), H-3->LUMO (6%)                                                                                           |
| 9   | 33947.06936                | 294.58 | 0.0013 | H-2->L+1 (96%)                                                                                                                                                            |
| 10  | 34080.15084                | 293.43 | 0.0506 | H-5->LUMO (16%), H-3->LUMO (70%) HOMO->L+2 (5%)                                                                                                                           |
| 11  | 34779.43353                | 287.53 | 0.0937 | <b>HOMO-&gt;L+2 (87%)</b> , H-3->LUMO (4%), H-1->L+3 (3%)                                                                                                                 |
| 12  | 35271.43173                | 283.52 | 0.0017 | H-8->L+1 (17%), H-4->L+1 (59%) H-10->L+1 (7%), H-6->L+1 (4%), H-5->L+1 (3%), H-                                                                                           |
| 13  | 37200.70993                | 268.81 | 0.0673 | H-11->LUMO (15%), H-8->L+1 (11%), H-6->L+1 (19%), H-4->L+1 (12%), H-3->L+1 (17%)                                                                                          |
| 14  | 37543.49556                | 266.36 | 0.0256 | H-11->LUMO (25%), H-10->LUMO (10%), H-8->LUMO (14%), H-6->L+1 (15%), H-3->L+1 (16%)                                                                                       |
| 15  | 38225.84061                | 261.60 | 0.0167 | H-10->L+1 (18%), H-8->L+1 (27%), H-4->L+1 (14%), H-3->L+1 (13%) H-11->LUMO (2%),                                                                                          |
| 16  | 38375.05318                | 260.59 | 0.0022 | H-2->L+2 (94%) H-2->L+6 (2%)                                                                                                                                              |
| 17  | 38993.68042                | 256.45 | 0.3848 | <b>H-1-&gt;L+2 (79%)</b> , HOMO->L+3 (10%), H-7->LUMO (4%)                                                                                                                |
| 18  | 39963.15885                | 250.23 | 0.027  | H-6->LUMO (91%) H-7->LUMO (3%)                                                                                                                                            |
| 19  | 40813.26722                | 245.02 | 0.0747 | H-7->LUMO (61%), H-5->LUMO (15%) H-8->LUMO (3%), H-6->LUMO (5%), H-5->L+1 (5%),                                                                                           |
| 20  | 41704.50986                | 239.78 | 0.0015 | H-5->L+1 (88%) H-8->L+1 (4%), H-7->LUMO (4%)                                                                                                                              |
| 21  | 43257.93369                | 231.17 | 0.0214 | H-10->LUMO (28%), H-8->LUMO (63%) H-11->LUMO (4%)                                                                                                                         |
| 22  | 43676.53544                | 228.96 | 0.4128 | H-7->L+1 (11%), <b>HOMO-&gt;L+3 (67%)</b> , H-1->L+2 (7%), HOMO->L+4 (5%)                                                                                                 |
| 23  | 44142.7239                 | 226.54 | 0.0043 | H-11->LUMO (10%), H-10->LUMO (15%), H-9->LUMO (72%)                                                                                                                       |
| 24  | 44227.41211                | 226.10 | 0.1834 | H-7->L+1 (69%), HOMO->L+3 (11%) H-8->L+1 (3%), H-3->L+2 (8%), H-1->L+2 (3%)                                                                                               |
| 25  | 44604.87959                | 224.19 | 0.0314 | H-7->L+1 (10%), H-3->L+2 (75%) H-1->L+4 (7%)                                                                                                                              |
| 26  | 45492.89601                | 219.81 | 0.0143 | HOMO->L+4 (28%), HOMO->L+5 (65%)                                                                                                                                          |
| 27  | 45878.42903                | 217.97 | 0.0014 | H-2->L+3 (61%), H-2->L+4 (28%) H-2->L+5 (5%), HOMO->L+5 (3%)                                                                                                              |
| 28  | 46064.7431                 | 217.09 | 0.1216 | H-1->L+3 (32%), HOMO->L+4 (28%), HOMO->L+5 (17%) H-4->L+2 (9%)                                                                                                            |
| 29  | 46530.93156                | 214.91 | 0.0521 | H-4->L+2 (80%) H-11->LUMO (4%), H-1->L+3 (4%), HOMO->L+4 (3%)                                                                                                             |
| 30  | 46921.30391                | 213.12 | 0.0017 | H-10->L+1 (56%), H-9->L+1 (13%), H-8->L+1 (23%) H-11->L+1 (5%)                                                                                                            |
| 31  | 47528.63939                | 210.40 | 0.063  | H-12->LUMO (17%), H-10->LUMO (11%), H-1->L+3 (12%), HOMO->L+4 (13%), HOMO->L+6 (12%)                                                                                      |
| 32  | 47726.24523                | 209.53 | 0.1473 | H-11->L+1 (12%), H-1->L+3 (13%), <b>HOMO-&gt;L+6 (31%)</b> , H-12->LUMO (8%), H-9->L+1 (3%), H-3->L+2 (3%), H-1->L+4 (8%), HOMO->L+4 (2%), HOMO->L+7 (3%), HOMO->L+8 (5%) |
| 33  | 47737.53699                | 209.48 | 0.0125 | H-11->L+1 (59%), H-9->L+1 (15%), HOMO->L+6 (15%) H-1->L+4 (2%)                                                                                                            |
| 34  | 48394.07229                | 206.64 | 0.0798 | H-11->LUMO (20%), H-10->LUMO (17%), H-9->LUMO (14%) H-12->L+1 (2%), H-11->L+1 (                                                                                           |
| 35  | 48911.07368                | 204.45 | 0.0016 | HOMO->L+7 (54%), HOMO->L+8 (42%)                                                                                                                                          |
| 36  | 49212.72504                | 203.20 | 0.0394 | H-12->LUMO (37%), H-5->L+2 (16%) H-12->L+1 (8%), H-1->L+3 (5%), HOMO->L+6 (2%),                                                                                           |
| 37  | 49355.48517                | 202.61 | 0.0116 | H-5->L+2 (11%), HOMO->L+6 (13%), HOMO->L+7 (20%), HOMO->L+8 (27%) H-12->LUMO (3                                                                                           |
| 38  | 49689.39871                | 201.25 | 0.0964 | H-12->LUMO (13%), H-12->L+1 (10%), H-5->L+2 (54%) H-7->L+2 (4%), H-1->L+3 (4%)                                                                                            |
| 39  | 50007.98771                | 199.97 | 0.0064 | H-1->L+4 (24%), H-1->L+5 (59%) H-1->L+9 (2%), HOMO->L+7 (7%)                                                                                                              |
| 40  | 50715.33594                | 197.18 | 0.0406 | H-12->L+1 (10%), H-9->L+1 (36%) H-12->LUMO (6%), H-11->L+1 (8%), H-10->L+1 (4%)                                                                                           |
| 41  | 50877.45338                | 196.55 | 0.0631 | H-12->L+1 (15%), H-1->L+4 (33%), H-1->L+5 (19%) H-9->L+1 (4%), H-3->L+2 (3%), H                                                                                           |
| 42  | 51421.07107                | 194.47 | 0.0456 | H-12->L+1 (44%), H-9->L+1 (15%) H-12->LUMO (7%), H-11->L+1 (4%), H-10->L+1 (4%)                                                                                           |
| 43  | 51928.3938                 | 192.57 | 0.0147 | H-7->L+2 (16%), H-3->L+3 (16%), H-1->L+6 (36%) H-6->L+2 (8%), H-1->L+7 (4%), H-                                                                                           |
| 44  | 52035.66554                | 192.18 | 0.0003 | HOMO->L+9 (60%), HOMO->L+10 (22%) HOMO->L+6 (2%), HOMO->L+8 (3%)                                                                                                          |
| 45  | 52240.53037                | 191.42 | 0.0006 | H-2->L+3 (30%), H-2->L+4 (50%) H-13->LUMO (4%), H-2->L+5 (5%), H-2->L+6 (4%)                                                                                              |
| 46  | 52402.64781                | 190.83 | 0.0354 | H-6->L+2 (57%) H-13->LUMO (8%), H-7->L+2 (5%), H-2->L+5 (7%), H-1->L+4 (3%), H-                                                                                           |
| 47  | 52501.854                  | 190.47 | 0.0103 | H-13->LUMO (41%), H-7->L+2 (10%), H-3->L+3 (10%) H-14->LUMO (9%), H-2->L+4 (4%)                                                                                           |
| 48  | 52586.54222                | 190.16 | 0.0026 | H-13->LUMO (27%), HOMO->L+9 (15%), HOMO->L+10 (42%)                                                                                                                       |
| 49  | 52716.39748                | 189.69 | 0.0048 | H-13->LUMO (12%), H-6->L+2 (18%), H-2->L+5 (21%), HOMO->L+10 (12%) H-14->LUMO (                                                                                           |
| 50  | 53053.53723                | 188.49 | 0.0052 | H-14->LUMO (25%), H-3->L+3 (15%), H-2->L+5 (38%) H-2->L+4 (4%), H-2->L+8 (4%)                                                                                             |

## 18. Molecular orbital diagram of neutral (N) and cationic (C) species of bromoharmines (5 - 7)

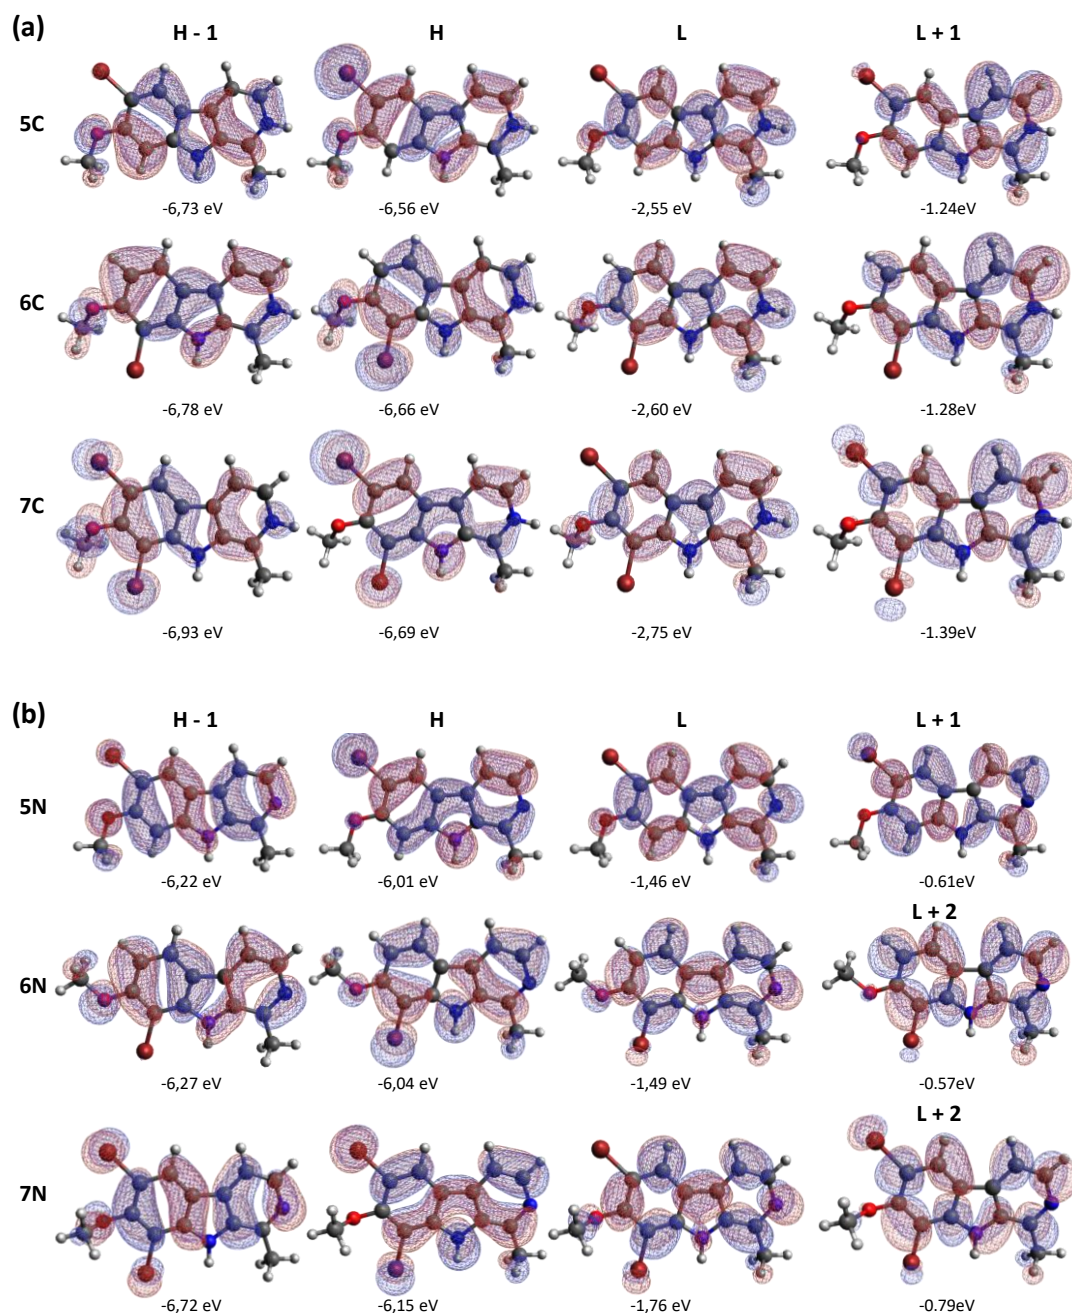

**Figure SI.6.** Molecular orbital diagram of (a) cationic (C) and (b) neutral (N) species of bromoharmines **5** – **7** (isovalue =  $0.02 e^{1/2} \text{ bohr}^{-3/2}$ ). HOMO-LUMO and HOMO-1-LUMO are the main transitions involved in the low energy absorption bands ( $300 \text{ nm} < \lambda < 400 \text{ nm}$ ) of the compounds in  $\text{H}_2\text{O}$ . The vertical transition energies were calculated for the optimized ground-state geometry using TD-DFT calculations. All calculations are performed in water at the B3LYP/aug-cc-pVDZ level of theory using the polarizable continuum model.

## 19. Molecular orbital diagram of neutral (N) and cationic (C) species of nitroharmines (8 - 10)

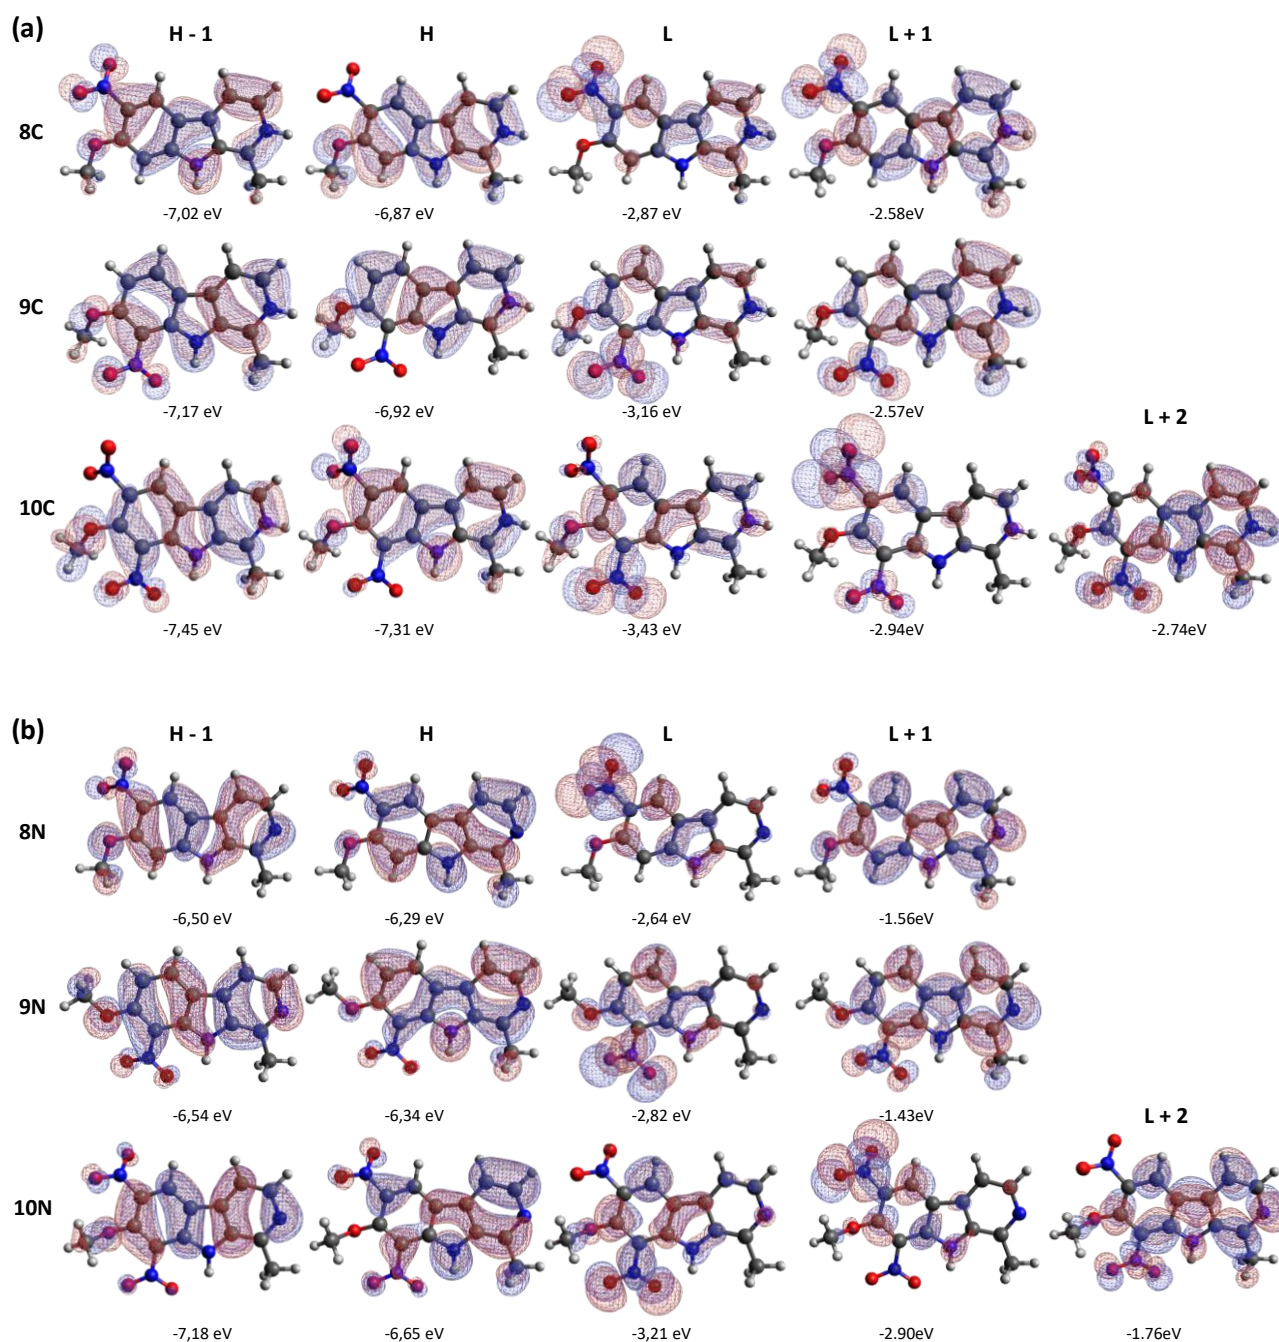

**Figure SI.7.** Molecular orbital diagram of (a) cationic (C) and (b) neutral (N) species of nitroharmines **8 – 10** (isovalue =  $0.02 e^{1/2} \text{ bohr}^{-3/2}$ ). HOMO-LUMO and HOMO-1-LUMO are the main transitions involved in the low energy absorption bands ( $300 \text{ nm} < \lambda < 500 \text{ nm}$ ) of the compounds in  $\text{H}_2\text{O}$ . The vertical transition energies were calculated for the optimized ground-state geometry using TD-DFT calculations. All calculations are performed in water at the B3LYP/aug-cc-pVDZ level of theory using the polarizable continuum model.

## 20. Other molecular orbital diagram of compounds 5 to 10

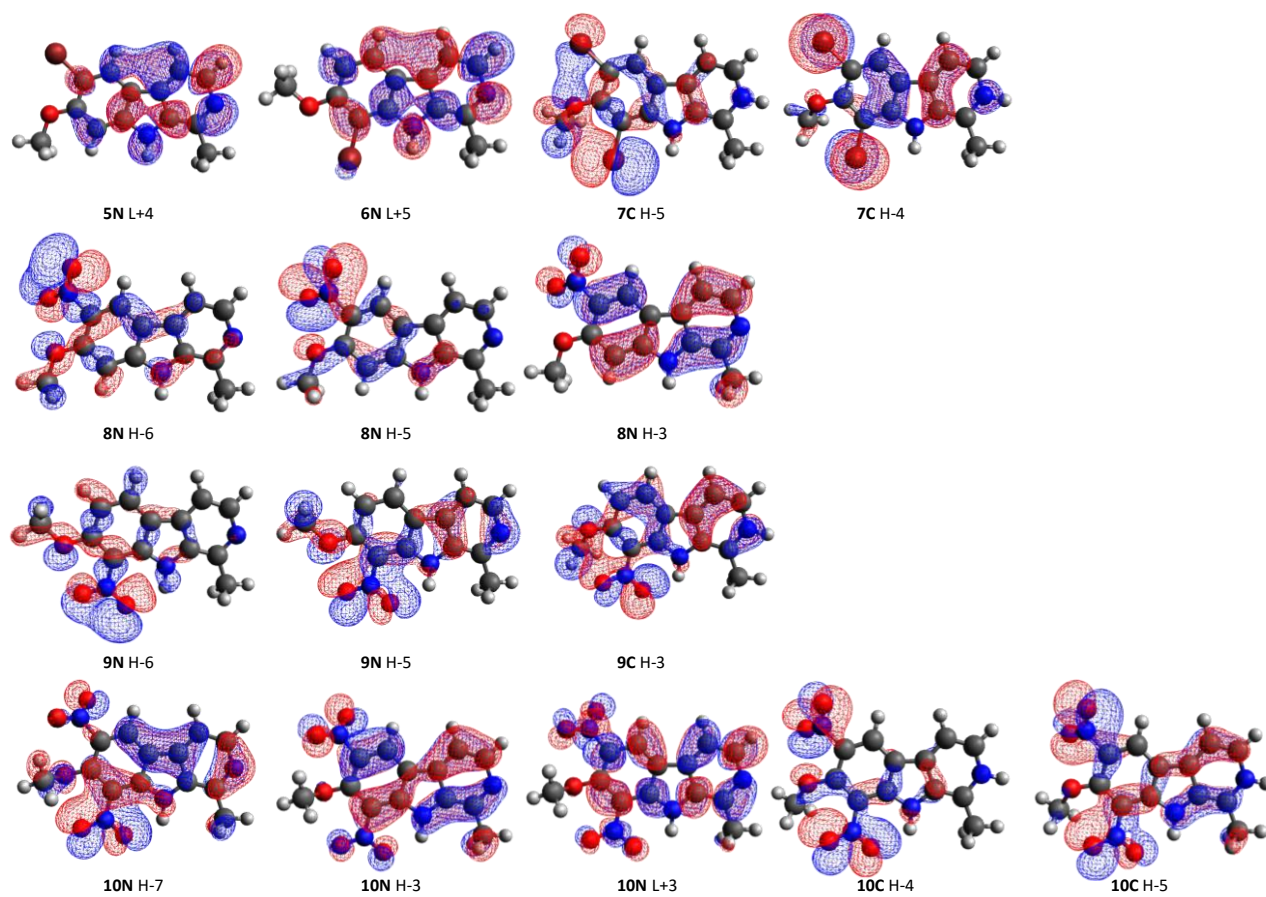

**Figure SI.8.** Molecular orbital diagram of compounds **5** to **10** (isovalue =  $0.02 e^{1/2} \text{ bohr}^{-3/2}$ ) involved in higher energy absorption bands ( $230 \text{ nm} > \lambda > 300 \text{ nm}$ ) of the compounds in  $\text{H}_2\text{O}$ . The vertical transition energies were calculated at the optimized ground-state geometry using TD-DFT calculations. All calculations are performed in water at the B3LYP/aug-cc-pVDZ level of theory using the polarizable continuum model.

**Table SI.13.** Self-Consistent Field (E) energies of different tautomeric species calculated at the B3LYP/aug-cc-pVDZ/PCM(water) level of theory.  $\Delta E$  is the difference of energy between the neutral (**N**) and zwitterionic (**Z**) species (*i.e.*,  $E(\mathbf{N})-E(\mathbf{Z})$ ) expressed in eV.

| Compound   | E / eV     | Tautomer   | E / eV     | $\Delta E = E(\mathbf{N})-E(\mathbf{Z}) / \text{eV}$ |
|------------|------------|------------|------------|------------------------------------------------------|
| <b>5N</b>  | -3260.9942 | <b>5Z</b>  | -3260.9816 | -0.3420                                              |
| <b>6N</b>  | -3260.9932 | <b>6Z</b>  | -3260.9764 | -0.4594                                              |
| <b>7N</b>  | -5834.5399 | <b>7Z</b>  | -5834.5292 | -0.2932                                              |
| <b>8N</b>  | -891.9782  | <b>8Z</b>  | -891.9677  | -0.2855                                              |
| <b>9N</b>  | -891.9776  | <b>9Z</b>  | -891.9562  | -0.5823                                              |
| <b>10N</b> | -1096.5004 | <b>10Z</b> | -1096.4901 | -0.2593                                              |

22. Fluorescence spectra of 6-bromoharmine (5) as a function of pH and O<sub>2</sub> concentration.

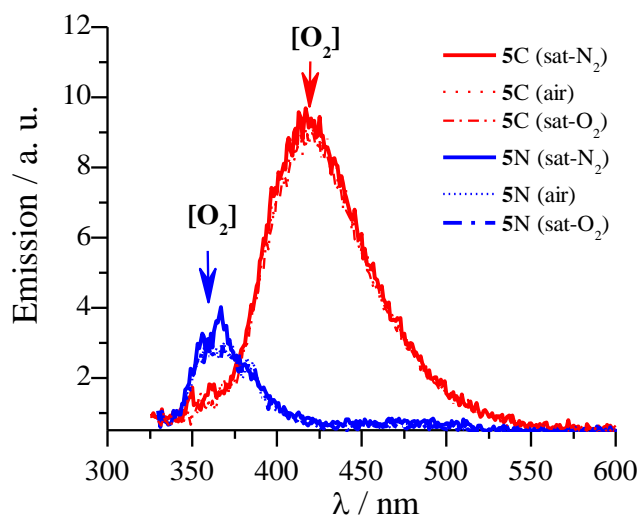

**Figure SI.9.** Corrected fluorescence spectra of 6-bromoharmine (5) in aqueous solution as a function of pH and O<sub>2</sub> concentration. Spectra were obtained for three oxygen concentrations (*i.e.*, N<sub>2</sub>-saturated, aerated, and O<sub>2</sub>-saturated) under acidic (**red lines**) and alkaline (**blue lines**) conditions. The excitation wavelengths were 325 and 340 nm for acidic and alkaline experiments, respectively.



## 23. Phosphorescence spectra at 77 K

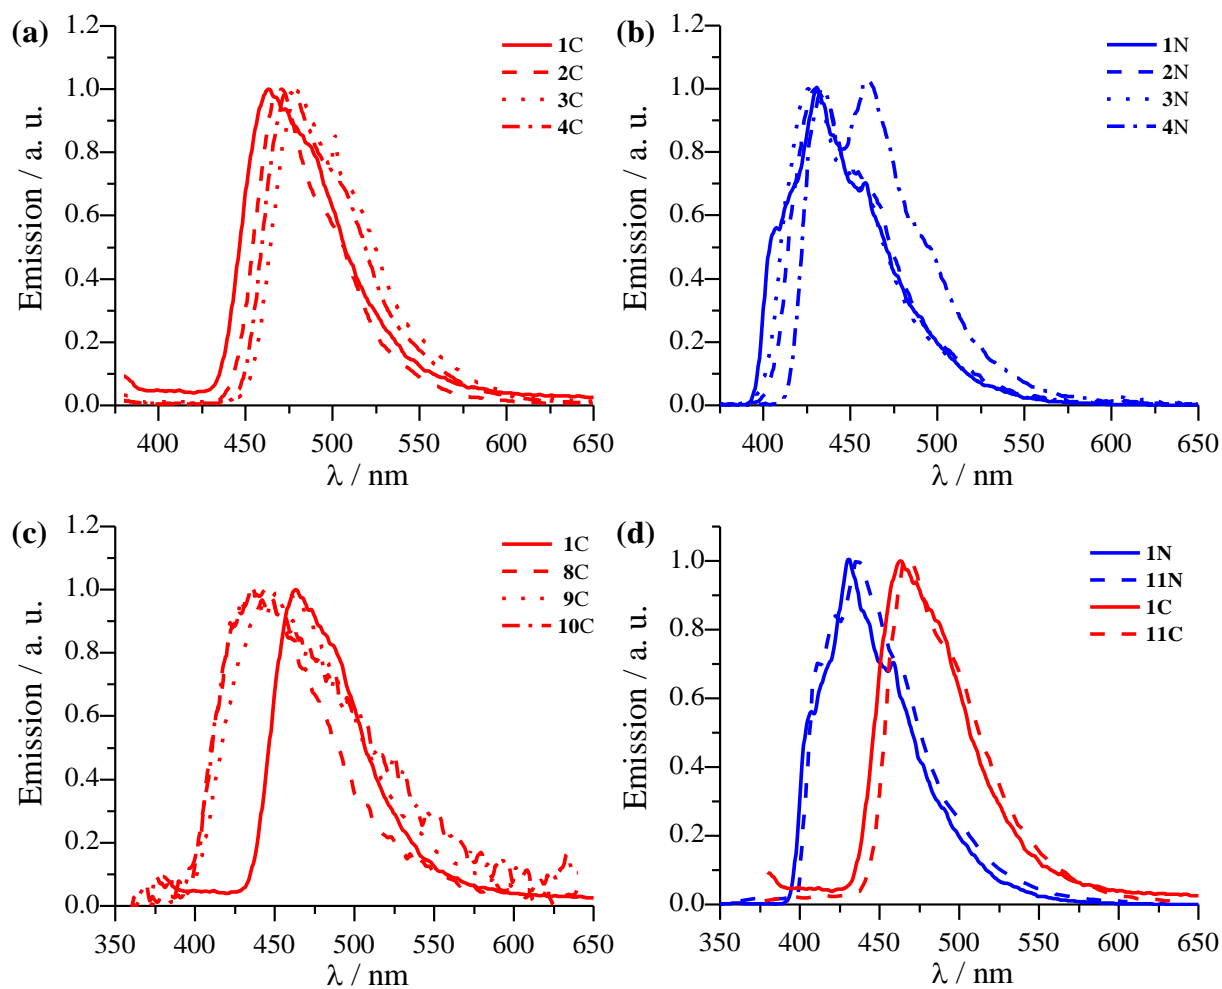

**Figure SI.10.** Phosphorescence spectra of compounds (a) 1C–4C, (b) 1N–4N, (c) 1C and 8C–10C and (d) 11N and 11C, measured in solid matrix (isopropanol-ethyl ether (1:1)) at 77 K. For acidic measurements, samples were doped with  $\text{HClO}_4$  before freezing.

## 24. Calculated (0K) vs. experimental (77K) maximum wavelength of phosphorescence emission

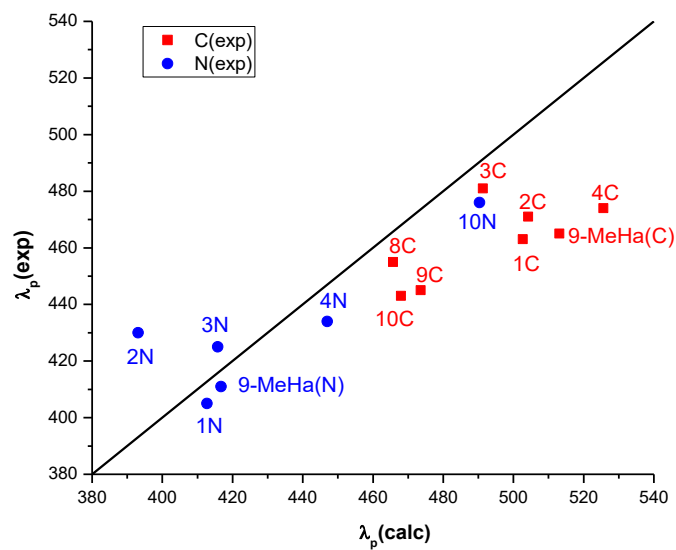

**Figure SI.11.** Correlation between experimental (measured at 77K) and theoretical (calculated at 0K) maximum wavelength of phosphorescence emission of cationic (C) and neutral (N) species of compounds **1** – **10** and 9-methyl-harmine (9-Me-Ha).

## 25. Spin-density distribution of 1 - 3

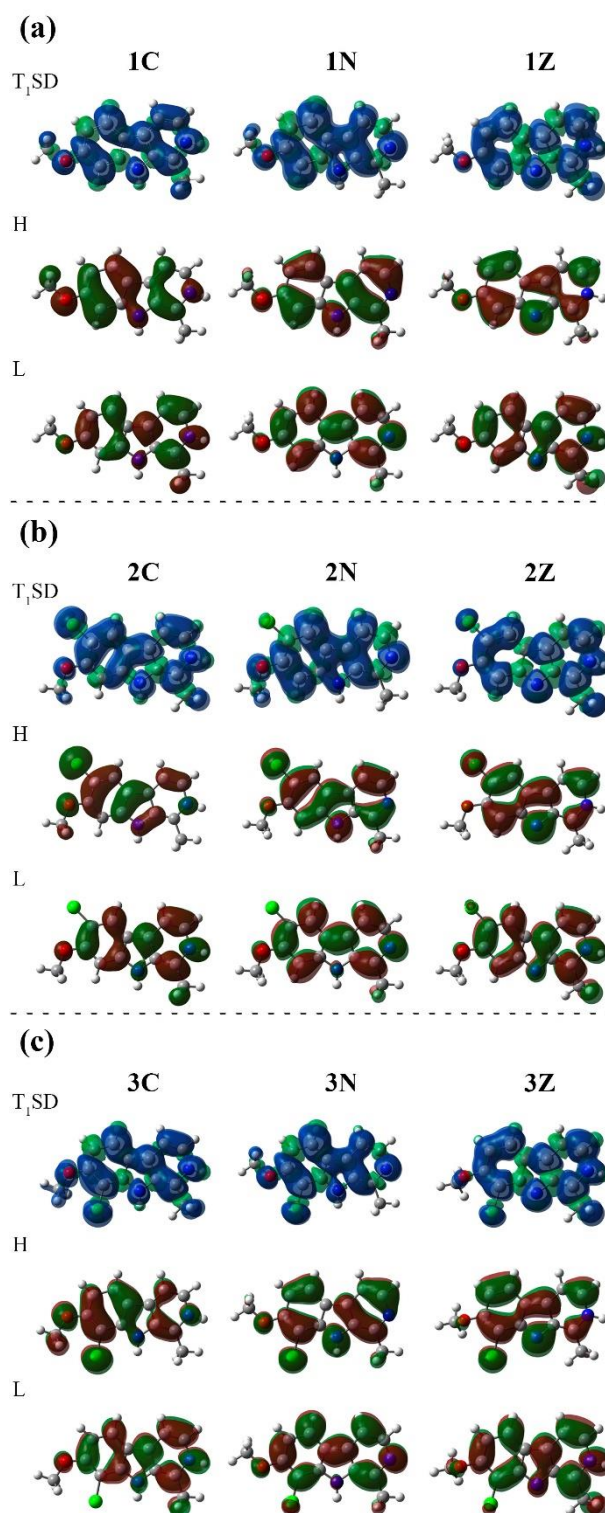

**Figure SI.12.** *Top:* spin-density distribution (SD) for the fully-relaxed lowest triplet excited states of cationic (C), neutral (N) and zwitterionic (Z) species of harmine (1), 6-chloroharmine (2) and 8-chloroharmine (3); isovalue:  $0.0004 e \text{ bohr}^{-3}$ . *Bottom:* contour plots of the HOMO and LUMO of all the compounds in their optimized ground-state geometries; isovalue =  $0.02 e^{1/2} \text{ bohr}^{-3/2}$ . All calculations are performed in vacuo at the B3LYP/TZVP level of theory.

## 26. Spin-density distribution of 5 - 10

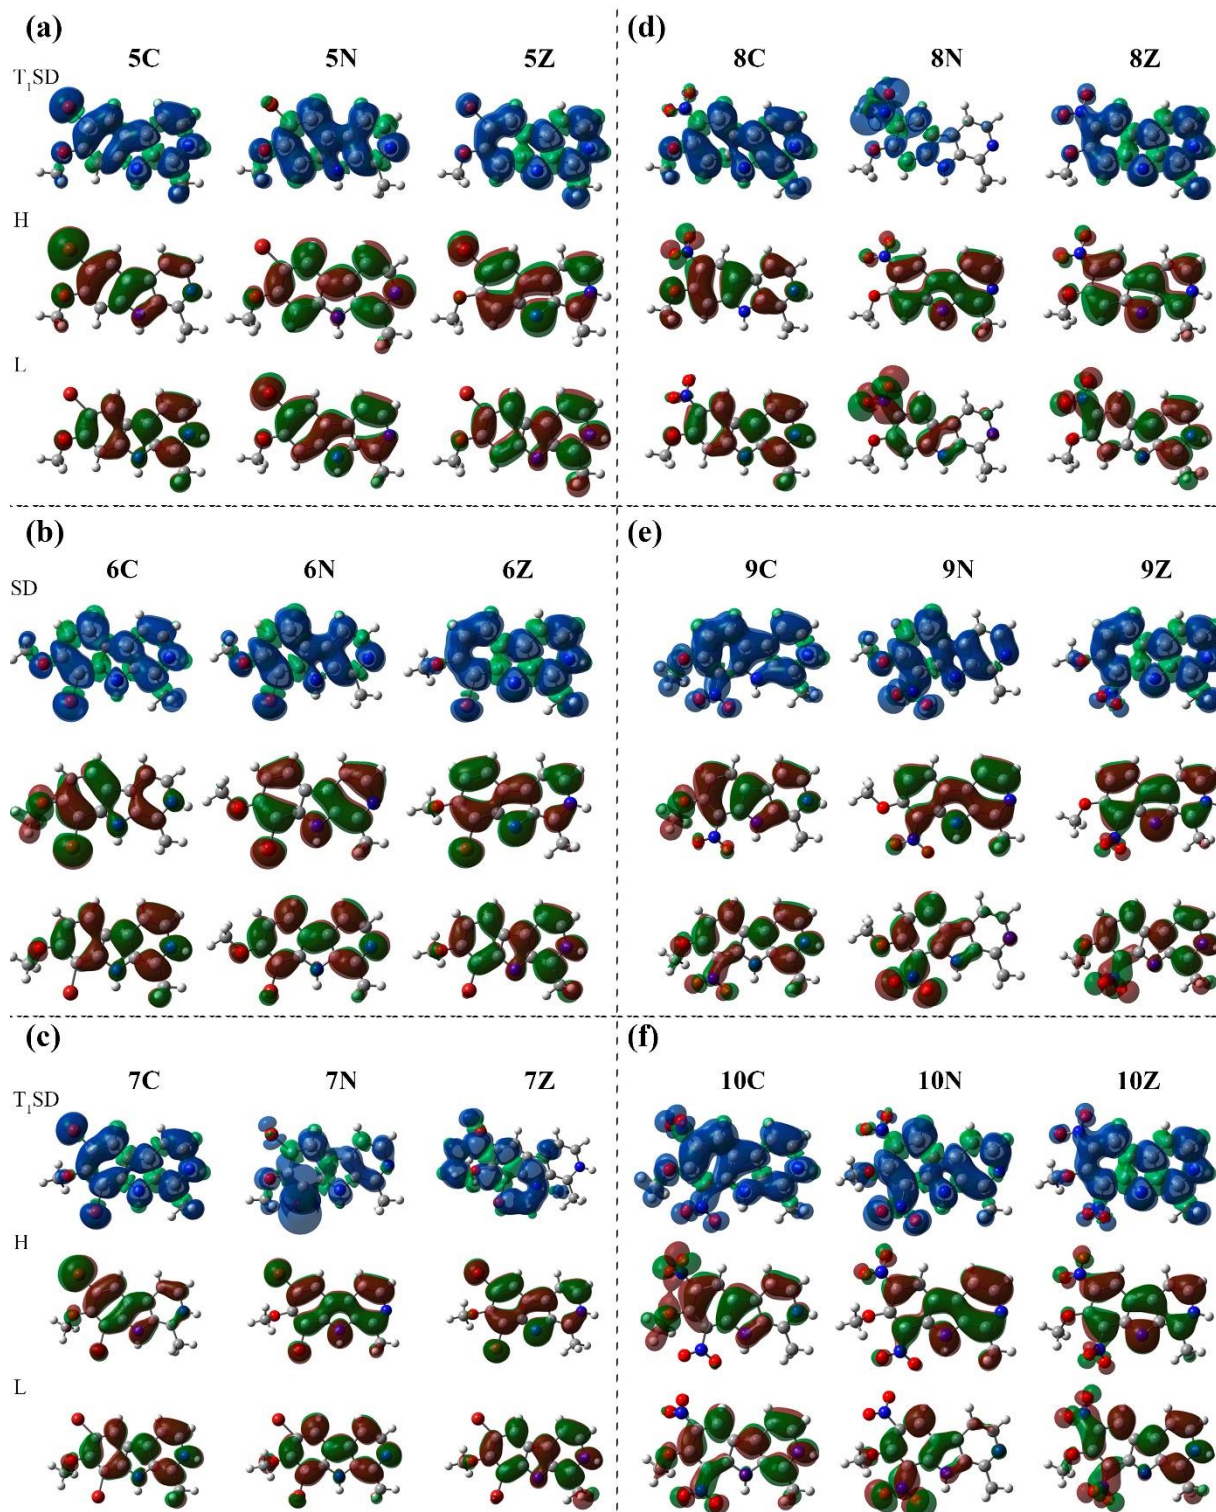

**Figure SI.13.** *Top:* spin-density distribution (SD) for the fully-relaxed lowest triplet excited states of cationic, neutral and zwitterionic species of compounds **5** - **10**; isovalue:  $0.0004 \text{ e bohr}^{-3}$ . *Bottom:* Contour plots of the HOMO and LUMO of all the compounds in their optimized ground-state geometries; isovalue =  $0.02 \text{ e}^{1/2} \text{ bohr}^{-3/2}$ . All calculations are performed in vacuo at the B3LYP/TZVP level of theory.

27. Dipole moments and the total electron density in the ground ( $S_0$ ) and triplet ( $T_1$ ) states

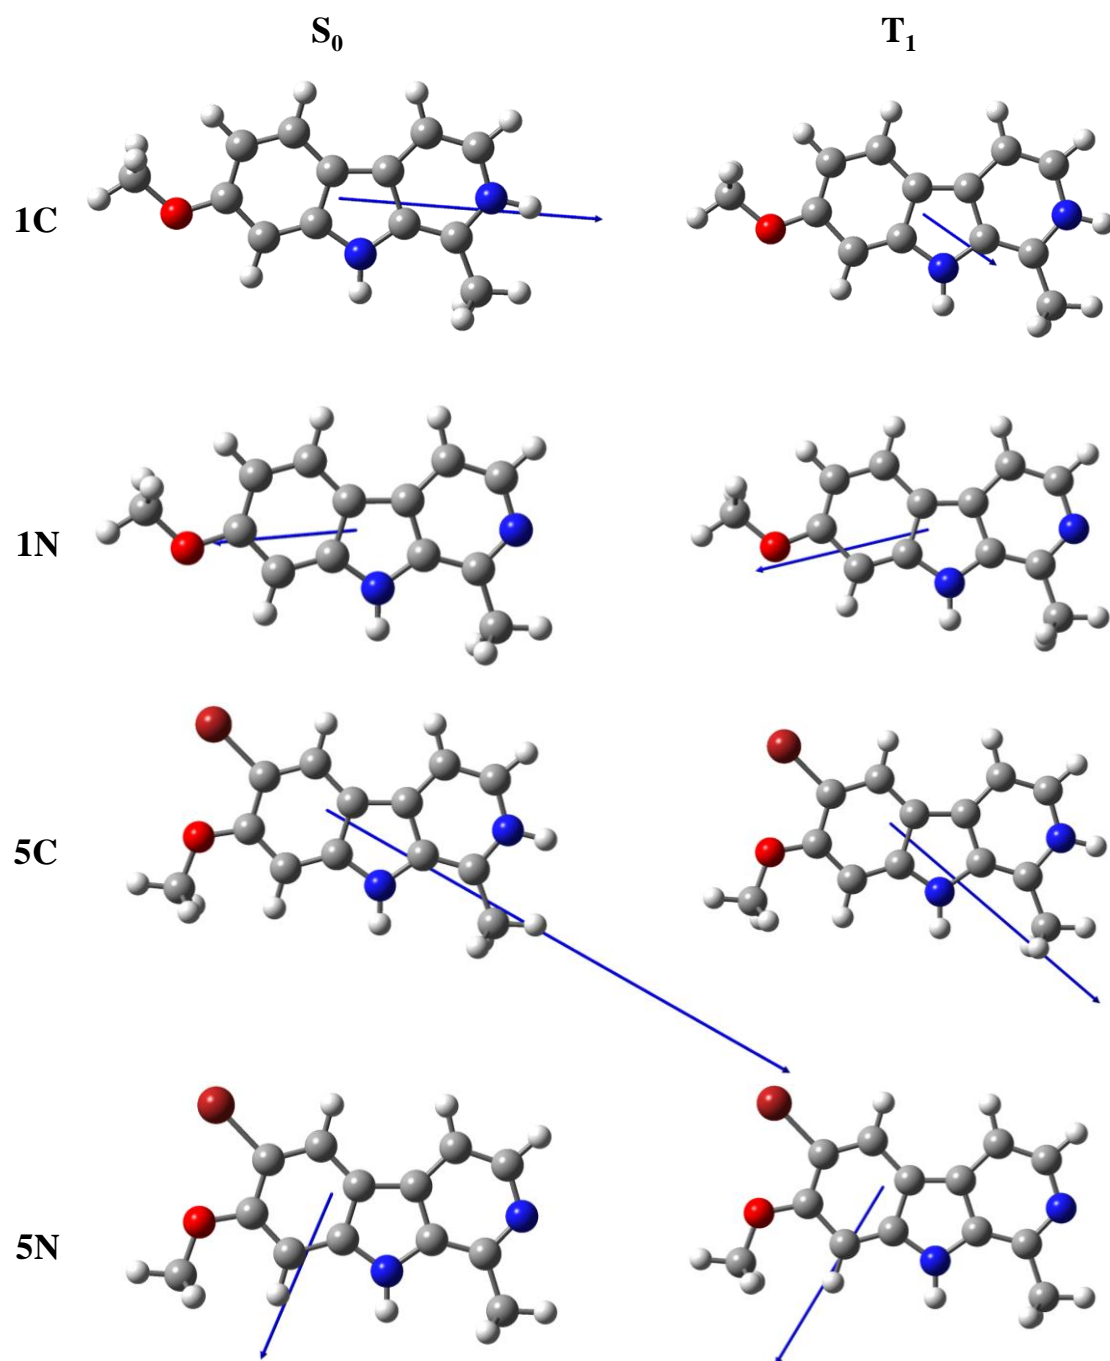

**Figure SI.14.**  $\rho$  and  $\mu$  plots for singlet ground ( $S_0$ ) and excited triplet ( $T_1$ ) states of cationic (C) and neutral (N) species of harmine (**1**), and 6-bromoharmine (**5**), as representative examples.

28. Relationship between  $\lambda_{0-0}$ ,  $\mu_d^C(T_1)$  and experimental  $\Phi_{\Delta}^{(O_2)}$

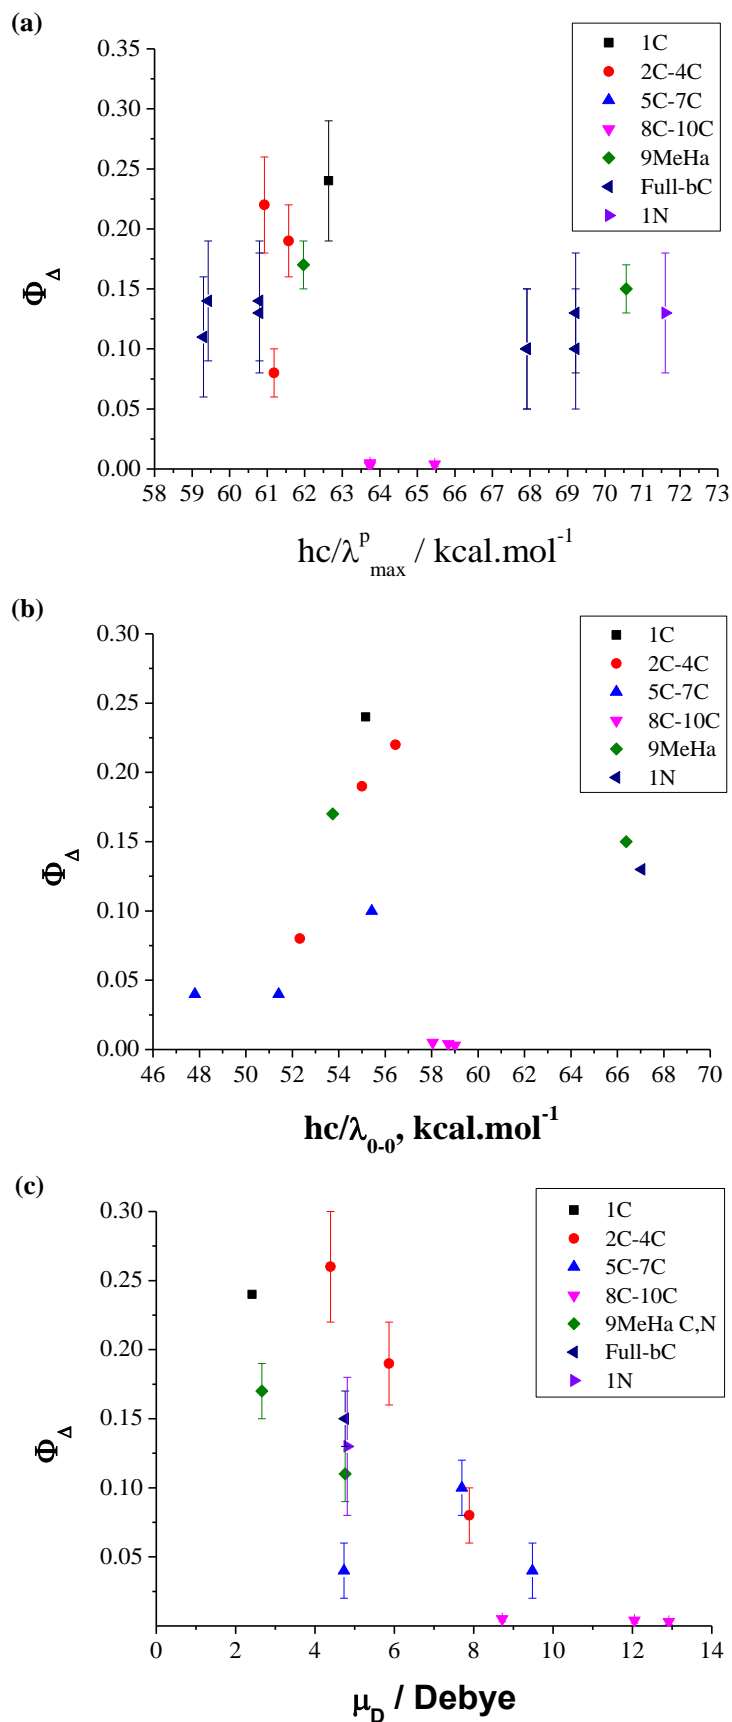

**Figure SI.15.** Relationship between experimental quantum yield of singlet oxygen production ( $\Phi_{\Delta}^{(O_2)}$ ) and (a) experimental maximum of phosphorescence emission ( $\lambda_p^{\text{exp}}$ ), (b) theoretical  $\lambda_{0-0}$ , and (c) theoretical dipole moment in the triplet state ( $\mu_d^C(T_1)$ ) values, respectively.
